# Supplementary material for: Epigenetic Modulation of Radiation-Induced Diacylglycerol Kinase Alpha Expression Prevents Pro-Fibrotic Fibroblast Response
Source: Cancers (Basel). 2021 May 18;13(10):2455. doi: 10.3390/cancers13102455 (PMC8158145; doi:10.3390/cancers13102455)
Supplement: Supplementary file 1 [file cancers-13-02455-s001.zip]

Archive with 11 entries (11 files):
- mergeSupFig.pdf
- Table S1. Oligonucleotides for sgRNA sequences.xlsx
- Table S10. List of differentially expressed genes from effect of mutation, adjusted for IR.xlsx
- Table S2. Oligonucleotides for siRNA sequences.xlsx
- Table S3. Primer sequences used for RT-qPCR.xlsx
- Table S4. Oligonucleotides used for EMSA probes.xlsx
- Table S5 Oligonucleotides for tagmentation-based sequencing library preparation.xlsx
- Table S6. Primer sequences used for ACT-qPCR.xlsx
- Table S7. List of differentially expressed genes from effect of mutation without IR.xlsx
- Table S8. List of differentially expressed genes from effect of IR in sgC.xlsx
- Table S9. List of differentially expressed genes from effect of IR in sgE1.xlsx
