# Supplementary material for: Epigenetic Modulation of Radiation-Induced Diacylglycerol Kinase Alpha Expression Prevents Pro-Fibrotic Fibroblast Response
Source: Cancers (Basel). 2021 May 18;13(10):2455. doi: 10.3390/cancers13102455 (PMC8158145; doi:10.3390/cancers13102455)
Supplement: Supplementary file 1 [file cancers-13-02455-s001.zip › Table S1. Oligonucleotides for sgRNA sequences.xlsx]

## Sheet: 工作表1
Name	Top strand srquence	Botten strand srquence
sgRNAd1	CACCGAGCTCCGCGGAACGCAGTCC	AAACCGGACTGCGTTCCGCGGAGCT
sgRNAd2	CACCGCCTTCCCTAGTGGAGCTCCG	AAACGCGGAGCTCCACTAGGGAAGG
sgRNAd3	CACCGGCGCGACACAGAACCAGCTC	AAACCCGGAGCTCCACTAGGGAAGG
sgRNAd4	CACCGTCTCTCCCATCTCGGGTCTT	AAACCAAGACCCGAGATGGGAGAGA
sgRNA-E1	CACCGCCTTCCCTAGTGGAGCTCCG	AAACCGGAGCTCCACTAGGGAAGGC
sgRNA-E2	CACCGTAGAGGTCGTTGCGTGGCGT	AAACACGCCACGCAACGACCTCTAC
* Sequences with underlines are additional bases were added to facilitate the cloning at the BsmBI site.
