# Supplementary material for: Epigenetic Modulation of Radiation-Induced Diacylglycerol Kinase Alpha Expression Prevents Pro-Fibrotic Fibroblast Response
Source: Cancers (Basel). 2021 May 18;13(10):2455. doi: 10.3390/cancers13102455 (PMC8158145; doi:10.3390/cancers13102455)
Supplement: Supplementary file 1 [file cancers-13-02455-s001.zip › Table S2. Oligonucleotides for siRNA sequences.xlsx]

## Sheet: 工作表1
Name	Target srquence
p300	GAAAUUAGGUUACACAACA
	GGACUACCCUAUCAAGUAA
	GAACAUGGCUCCACAACCA
	GGCAGUAUGUCGAUGAUAU
CBP (CREBBP)	UCACAGAGAUCCAGGGCGA
	GCGAAUGACAGCACAGAUU
	CCUCGGAAUUCCAGACUAU
	GCUCAAGGGCAGCCGAACA
EZH1	GAACACAGUUGCAUUGGUU
	GCAAGGUGGUUUCCUGUAA
	GCAAGCAGGUCUUUCAGUU
	GGGCUAAAUUGCACGCGUU
EZH2	CAAAGAAUCUAGCAUCAUA
	GAGGACGGCUUCCCAAUAA
	GCUGAAGCCUCAAUGUUUA
	GAAUGGAAACAGCGAAGGA
Control (Non-targeting)	UGGUUUACAUGUCGACUAA
	UGGUUUACAUGUUGUGUGA
	UGGUUUACAUGUUUUCUGA
	UGGUUUACAUGUUUUCCUA
