# Supplementary material for: Epigenetic Modulation of Radiation-Induced Diacylglycerol Kinase Alpha Expression Prevents Pro-Fibrotic Fibroblast Response
Source: Cancers (Basel). 2021 May 18;13(10):2455. doi: 10.3390/cancers13102455 (PMC8158145; doi:10.3390/cancers13102455)
Supplement: Supplementary file 1 [file cancers-13-02455-s001.zip › Table S3. Primer sequences used for RT-qPCR.xlsx]

## Sheet: 工作表1
Name (UPL hydrolysis probe)	Forward primer	Reverse primer
ACTA2 (35)	AGCCAAGCACTGTCAGGAAT	TTGTCACACACCAAGGCAGT
COL1A1 (67)	GGGATTCCCTGGACCTAAAG	GGAACACCTCGCTCTCCA
FN1 (33)	GGAAAGTGTCCCTATCTCTGATACC	AATGTTGGTGAATCGCAGGT
COL3A1 (20)	CTGGACCCCAGGGTCTTC	GACCATCTGATCCAGGGTTTC
DGKA (20)	GATCTGGCTCGATGCCTAAG	GATCTTTGCCAGATTCTGTCCT
HPRT1 (73)	TGACCTTGATTTATTTTGCATACC	CGAGCAAGACGTTCAGTCCT
GAPDH (60)	AGCCACATCGCTCAGACAC	GCCCAATACGACCAAATCC
CBP/CREBBP (49)	GCCAGAATCACCCTGAAGC	TTTCCCCAGAATCCACAAAC
p300 (38)	TCTGTTCCTACCCCAACAGC	CTGGGAAAGTGGAGTTGCAG
EZH1 (11)	CATGTGGCACAGACTGCTTC	GGTTGTGGAGCATGGCATA
EZH2 (35)	CCGCTGAGGATGTGGATAC	CAGTGTGCAGCCCACAAC
