# Supplementary material for: Epigenetic Modulation of Radiation-Induced Diacylglycerol Kinase Alpha Expression Prevents Pro-Fibrotic Fibroblast Response
Source: Cancers (Basel). 2021 May 18;13(10):2455. doi: 10.3390/cancers13102455 (PMC8158145; doi:10.3390/cancers13102455)
Supplement: Supplementary file 1 [file cancers-13-02455-s001.zip › Table S4. Oligonucleotides used for EMSA probes.xlsx]

## Sheet: 工作表1
Name	5' Modification	Positive stream sequence	Negative stream sequence
E1_WT Biotin	[Btn]	AGCTCCGCGGAACGCAGTCCAGGCGGGGCCGGGG	CCCCGGCCCCGCCTGGACTGCGTTCCGCGGAGCT
E1_WTme Biotin	[Btn]	AGCTC[5MedC]G[5MedC]GGAA[5MedC]GCAGTCCAGG[5MedC]GGGGC[5MedC]GGGG	CCC[5MedC]GGCCC[5MedC]GCCTGGACTG[5MedC]GTTC[5MedC]G[5MedC]GGAGCT
E1 WT		AGCTCCGCGGAACGCAGTCCAGGCGGGGCCGGGG	CCCCGGCCCCGCCTGGACTGCGTTCCGCGGAGCT
E1_mut		AGCTtCCGCGGAACGCAGTCCAGGCGGGGCCGGGG	CCCCGGCCCCGCCTGGACTGCGTTCCGCGGaAGCT
BD1_mut		AGCTCCGCGGAACGCAGTCCAGactaGGCCGGGG	CCCCGGCCtagtCTGGACTGCGTTCCGCGGAGCT
E2_WT Biotin	[Btn]	GAGGTCGTTGCGTGGCGTGGGTGGCTCGGGGAGT	ACTCCCCGAGCCACCCACGCCACGCAACGACCTC
E2_WTme Biotin	[Btn]	GAGGT [5MedC]GTTG [5MedC]GTGG [5MedC]GTGGGTGGCT [5MedC]GGGGAGT	ACTCCC [5MedC]GAGCCACCCA [5MedC]GCCA [5MedC]GCAA [5MedC]GACCTC
E2_WT		GAGGTCGTTGCGTGGCGTGGGTGGCTCGGGGAGT	ACTCCCCGAGCCACCCACGCCACGCAACGACCTC
E2_mut		GAGGTCGTTGCGTGGGTGGCTCGGGGAGT	ACTCCCCGAGCCACCCACGCAACGACCTC
