# Supplementary material for: Epigenetic Modulation of Radiation-Induced Diacylglycerol Kinase Alpha Expression Prevents Pro-Fibrotic Fibroblast Response
Source: Cancers (Basel). 2021 May 18;13(10):2455. doi: 10.3390/cancers13102455 (PMC8158145; doi:10.3390/cancers13102455)
Supplement: Supplementary file 1 [file cancers-13-02455-s001.zip › Table S5 Oligonucleotides for tagmentation-based sequencing library preparation.xlsx]

## Sheet: Sheet1
Purpose	Name	Sequence (5' to 3')
adaptor	Tn5ME-A	TCGTCGGCAGCGTCAGATGTGTATAAGAGACAG
	Tn5ME-B	GTCTCGTGGGCTCGGAGATGTGTATAAGAGACAG
	Tn5MErev	[phos]CTGTCTCTTATACACATCT
PCR primers	Tn5mCP1	AATGATACGGCGACCACCGAGATCTACACTCGTCGGCAGCGTC
	Tn5mCBar_n1	CAAGCAGAAGACGGCATACGAGATGGATGTTCTGTCTCGTGGGCTCGG
	Tn5mCBar_n2	CAAGCAGAAGACGGCATACGAGATCTTATCCAGGTCTCGTGGGCTCGG
	Tn5mCBar_n3	CAAGCAGAAGACGGCATACGAGATGTAAGTCACGTCTCGTGGGCTCGG
	Tn5mCBar_n4	CAAGCAGAAGACGGCATACGAGATTTCAGTGAGGTCTCGTGGGCTCGG
	Tn5mCBar_n5	CAAGCAGAAGACGGCATACGAGATCTCGTAATGGTCTCGTGGGCTCGG
	Tn5mCBar_n6	CAAGCAGAAGACGGCATACGAGATCATGTCTCAGTCTCGTGGGCTCGG
	Tn5mCBar_n7	CAAGCAGAAGACGGCATACGAGATAATCGTGGAGTCTCGTGGGCTCGG
	Tn5mCBar_n8	CAAGCAGAAGACGGCATACGAGATGTATCAGTCGTCTCGTGGGCTCGG
	Tn5mCBar9	CAAGCAGAAGACGGCATACGAGATTCGCCTTAGTCTCGTGGGCTCGG
	Tn5mCBar10	CAAGCAGAAGACGGCATACGAGATCTAGTACGGTCTCGTGGGCTCGG
	Tn5mCBar11	CAAGCAGAAGACGGCATACGAGATTTCTGCCTGTCTCGTGGGCTCGG
	Tn5mCBar12	CAAGCAGAAGACGGCATACGAGATGCTCAGGAGTCTCGTGGGCTCGG
	Tn5mCBar13	CAAGCAGAAGACGGCATACGAGATAGGAGTCCGTCTCGTGGGCTCGG
	Tn5mCBar14	CAAGCAGAAGACGGCATACGAGATCATGCCTAGTCTCGTGGGCTCGG
	Tn5mCBar15	CAAGCAGAAGACGGCATACGAGATGTAGAGAGGTCTCGTGGGCTCGG
	Tn5mCBar16	CAAGCAGAAGACGGCATACGAGATCCTCTCTGGTCTCGTGGGCTCGG
	Tn5mCBar17	CAAGCAGAAGACGGCATACGAGATAGCGTAGCGTCTCGTGGGCTCGG
	Tn5mCBar18	CAAGCAGAAGACGGCATACGAGATCAGCCTCGGTCTCGTGGGCTCGG
*Specific barcode sequences are highlight in red
