# Supplementary material for: Epigenetic Modulation of Radiation-Induced Diacylglycerol Kinase Alpha Expression Prevents Pro-Fibrotic Fibroblast Response
Source: Cancers (Basel). 2021 May 18;13(10):2455. doi: 10.3390/cancers13102455 (PMC8158145; doi:10.3390/cancers13102455)
Supplement: Supplementary file 1 [file cancers-13-02455-s001.zip › Table S6. Primer sequences used for ACT-qPCR.xlsx]

## Sheet: 工作表1
Name	Forward primer	Reverse primer
Promo	GGGTGAGAGGGTGAGACTTG	TTCGGGCATAGGTTGAAGAG
EGR1_BD1	TAGTTCCCCACCCTTCCCTA	CAACGACCTCTAGCGCTTCT
EGR1_BD2	AGAAGCGCTAGAGGTCGTTG	GCCATGACCCCATTTTGT
Ctrl	AGAAGCGCTAGAGGTCGTTG	GCCATGACCCCATTTTGT
