# Supplementary material for: Epigenetic Modulation of Radiation-Induced Diacylglycerol Kinase Alpha Expression Prevents Pro-Fibrotic Fibroblast Response
Source: Cancers (Basel). 2021 May 18;13(10):2455. doi: 10.3390/cancers13102455 (PMC8158145; doi:10.3390/cancers13102455)
Supplement: Supplementary file 1 [file cancers-13-02455-s001.zip › Table S7. List of differentially expressed genes from effect of mutation without IR.xlsx]

## Sheet: Sheet1
Table S7. The list DEGs from effect of IR in sgC
ENSEMBL_id	symbol	log2FoldChange	pvalue	padj
ENSG00000164116.16	GUCY1A1	1.59574	3.85912e-05	0.0277381
ENSG00000146535.13	GNA12	-1.17333	3.42485e-06	0.00400023
ENSG00000231234.2	SKP1P1	1.16976	8.33682e-07	0.00155798
ENSG00000185883.11	ATP6V0C	0.77208	2.549e-05	0.0216526
ENSG00000071967.11	CYBRD1	0.483679	1.34968e-07	0.000315286
ENSG00000062485.18	CS	1.13409	3.22831e-06	0.00400023
ENSG00000104979.8	C19orf53	-0.543922	6.80893e-05	0.042708
ENSG00000106683.14	LIMK1	-0.571472	1.85557e-07	0.000385299
ENSG00000197965.11	MPZL1	1.50555	1.02932e-28	9.61799e-25
ENSG00000167244.19	IGF2	-0.565798	1.75545e-05	0.016403
ENSG00000101210.11	EEF1A2	-0.570409	9.02788e-05	0.0496215
ENSG00000258674.5	NA	0.861183	2.48206e-08	6.62639e-05
ENSG00000167862.9	MRPL58	-0.515217	7.2666e-05	0.0438059
ENSG00000185414.19	MRPL30	-1.44731	4.78509e-29	8.94237e-25
ENSG00000197614.10	MFAP5	0.513457	3.70293e-05	0.0276801
ENSG00000198482.11	ZNF808	-1.18672	3.12237e-11	1.45877e-07
ENSG00000157680.15	DGKI	1.04158	1.37385e-08	5.13489e-05
ENSG00000204519.10	ZNF551	1.68949	6.7999e-06	0.0070598
ENSG00000154529.14	CNTNAP3B	1.11885	2.20547e-06	0.00373262
ENSG00000204837.4	FGF7P3	-1.92545	2.48826e-06	0.00373262
ENSG00000261611.6	NA	2.81831	4.40226e-15	2.74231e-11
ENSG00000104341.16	LAPTM4B	0.896604	3.3487e-05	0.0260752
ENSG00000135482.6	ZC3H10	-2.21925	2.21556e-08	6.62639e-05
ENSG00000137672.12	TRPC6	0.777388	7.54516e-05	0.0440638
ENSG00000179454.13	KLHL28	0.53932	1.20005e-05	0.0118034
ENSG00000164176.12	EDIL3	0.838977	5.50338e-05	0.0367312
ENSG00000143418.19	CERS2	-0.699049	4.55326e-05	0.0315153
ENSG00000094841.13	UPRT	0.645894	4.34686e-06	0.00477848
ENSG00000284116.1	NA	2.49714	6.85595e-05	0.042708
ENSG00000250722.5	SELENOP	0.702166	7.98547e-05	0.045222
ENSG00000186376.14	ZNF75D	-0.425755	2.89618e-05	0.0235321
ENSG00000127990.17	SGCE	0.481687	3.16265e-06	0.00400023
ENSG00000146476.10	ARMT1	0.897337	2.49566e-05	0.0216526
ENSG00000122912.14	SLC25A16	0.472018	2.59654e-06	0.00373262
