# Supplementary material for: Epigenetic Modulation of Radiation-Induced Diacylglycerol Kinase Alpha Expression Prevents Pro-Fibrotic Fibroblast Response
Source: Cancers (Basel). 2021 May 18;13(10):2455. doi: 10.3390/cancers13102455 (PMC8158145; doi:10.3390/cancers13102455)
Supplement: Supplementary file 1 [file cancers-13-02455-s001.zip › Table S8. List of differentially expressed genes from effect of IR in sgC.xlsx]

## Sheet: Sheet1
Table S8. The list DEGs from effect of IR in sgC
ENSEMBL_id	symbol	log2FoldChange	pvalue	padj
ENSG00000078237.6	TIGAR	0.529317	0.000275739	0.00802151
ENSG00000070087.14	PFN2	0.507281	8.64989e-05	0.00285695
ENSG00000213988.10	ZNF90	-1.7051	4.08231e-05	0.00148392
ENSG00000164283.12	ESM1	-1.21418	1.65442e-12	1.44171e-10
ENSG00000130204.12	TOMM40	-0.469836	0.000109641	0.00352586
ENSG00000172667.10	ZMAT3	0.50287	0.000104839	0.00339942
ENSG00000127564.16	PKMYT1	-3.73123	1.06857e-29	1.79814e-27
ENSG00000109805.9	NCAPG	-4.00018	1.45935e-94	9.18918e-92
ENSG00000275591.4	XKR5	-4.56464	5.76938e-19	6.90909e-17
ENSG00000153044.9	CENPH	-1.92933	3.0745e-09	2.06234e-07
ENSG00000119471.14	HSDL2	0.356065	0.00115506	0.0268094
ENSG00000168811.6	IL12A	0.700163	0.00190455	0.0401045
ENSG00000144959.9	NCEH1	-0.379003	0.000561441	0.01477
ENSG00000085999.11	RAD54L	-3.89422	1.67799e-42	3.80864e-40
ENSG00000164104.11	HMGB2	-1.88818	5.28299e-19	6.40522e-17
ENSG00000050820.16	BCAR1	-0.551827	0.000770559	0.0189915
ENSG00000212719.11	LINC02693	-0.632838	0.00242737	0.0491898
ENSG00000173546.7	CSPG4	-0.428228	0.00232881	0.0478007
ENSG00000136861.17	CDK5RAP2	-0.256997	0.00146108	0.032336
ENSG00000112697.15	TMEM30A	0.614833	0.000242221	0.00717473
ENSG00000138658.15	ZGRF1	-1.3361	2.90919e-06	0.00013499
ENSG00000142856.16	ITGB3BP	-1.0102	0.000827041	0.0201295
ENSG00000249115.8	HAUS5	-0.443932	0.00207353	0.0431047
ENSG00000121957.13	GPSM2	-0.874391	5.41221e-09	3.54518e-07
ENSG00000160949.16	TONSL	-1.31547	1.26078e-13	1.19089e-11
ENSG00000075131.9	TIPIN	-0.624891	0.000121971	0.00387133
ENSG00000113657.12	DPYSL3	-0.360317	3.31139e-06	0.000151378
ENSG00000025770.18	NCAPH2	-0.604819	0.000354705	0.00996235
ENSG00000253522.6	MIR3142HG	-3.75071	0.000605138	0.0157497
ENSG00000154451.14	GBP5	-5.01636	7.35704e-05	0.00249322
ENSG00000204899.5	MZT1	-0.462943	0.00148669	0.0327913
ENSG00000143162.8	CREG1	0.465491	0.00238127	0.0486726
ENSG00000004838.13	ZMYND10	-1.34849	8.28805e-05	0.00275609
ENSG00000138778.11	CENPE	-2.34704	5.69861e-31	1.02997e-28
ENSG00000117650.12	NEK2	-4.68372	6.276e-93	3.71235e-90
ENSG00000171159.4	C9orf16	-0.563157	8.50858e-05	0.00281882
ENSG00000092621.12	PHGDH	-1.37982	1.39075e-26	2.12089e-24
ENSG00000168078.9	PBK	-3.88212	1.24129e-105	9.69202e-103
ENSG00000167553.15	TUBA1C	-0.749895	9.75065e-08	5.48765e-06
ENSG00000119777.19	TMEM214	0.380094	0.000488238	0.0131454
ENSG00000266680.1	NA	0.832598	0.000729238	0.0181103
ENSG00000055813.5	CCDC85A	-0.82728	0.000376569	0.010471
ENSG00000164938.13	TP53INP1	0.669086	3.9749e-05	0.00144757
ENSG00000163956.11	LRPAP1	0.611114	2.76451e-09	1.88025e-07
ENSG00000139618.14	BRCA2	-2.0116	6.16664e-16	6.50664e-14
ENSG00000118513.18	MYB	-4.01347	0.000634329	0.0163191
ENSG00000174871.10	CNIH2	-0.910317	0.0024135	0.0490744
ENSG00000139354.10	GAS2L3	-3.2802	2.18388e-27	3.46581e-25
ENSG00000172432.18	GTPBP2	-0.351893	0.000425826	0.0116253
ENSG00000033030.13	ZCCHC8	-0.316737	0.000634539	0.0163191
ENSG00000005022.5	SLC25A5	-0.331055	4.63493e-05	0.00166926
ENSG00000158402.19	CDC25C	-4.44139	2.78351e-53	7.44303e-51
ENSG00000074800.15	ENO1	-0.55427	1.75379e-11	1.39163e-09
ENSG00000122483.17	CCDC18	-1.37785	1.98454e-12	1.67698e-10
ENSG00000185883.11	ATP6V0C	0.599824	0.00179065	0.0381589
ENSG00000166881.9	NEMP1	-0.912419	1.99944e-14	1.95145e-12
ENSG00000108468.14	CBX1	-0.428799	1.62622e-05	0.000636149
ENSG00000137834.14	SMAD6	-0.409809	0.00221767	0.0455672
ENSG00000079435.9	LIPE	-0.5201	0.00155096	0.0339409
ENSG00000119139.19	TJP2	-0.43741	0.000174054	0.00530866
ENSG00000126787.12	DLGAP5	-4.83014	6.81086e-100	5.11339e-97
ENSG00000089280.18	FUS	-0.574093	2.00048e-08	1.22789e-06
ENSG00000180198.16	RCC1	-0.7233	0.000631841	0.0162979
ENSG00000028277.21	POU2F2	0.526596	6.95378e-05	0.00237719
ENSG00000184678.10	H2BC21	0.670124	9.62933e-06	0.000394056
ENSG00000123243.14	ITIH5	0.39195	0.000604369	0.0157497
ENSG00000161800.12	RACGAP1	-1.94851	1.08496e-72	4.81327e-70
ENSG00000103187.7	COTL1	-0.357787	0.000130005	0.00409968
ENSG00000112742.9	TTK	-4.18321	4.39548e-55	1.26176e-52
ENSG00000163661.3	PTX3	-0.348262	6.68267e-05	0.00230063
ENSG00000125753.13	VASP	-0.322264	0.00146772	0.0324462
ENSG00000122566.21	HNRNPA2B1	-0.395514	4.87248e-06	0.000216161
ENSG00000137094.14	DNAJB5	1.06092	2.2599e-05	0.00087353
ENSG00000106105.13	GARS1	-0.355939	0.00025905	0.0075812
ENSG00000179242.15	CDH4	-0.778926	2.22704e-06	0.000106248
ENSG00000135679.23	MDM2	0.772399	3.42296e-08	2.03089e-06
ENSG00000213699.8	SLC35F6	-1.32624	2.31746e-06	0.000109532
ENSG00000273812.1	NA	-3.56285	0.00192728	0.0404521
ENSG00000284946.1	NA	-4.09232	1.2416e-05	0.000499612
ENSG00000278259.4	MYO19	-0.792087	3.86958e-08	2.26829e-06
ENSG00000164687.10	FABP5	-1.07647	6.26871e-06	0.000270122
ENSG00000153885.14	KCTD15	-0.639743	0.00115708	0.0268246
ENSG00000197905.8	TEAD4	-0.34885	0.000632046	0.0162979
ENSG00000169116.11	PARM1	1.28822	7.43937e-19	8.74799e-17
ENSG00000110619.17	CARS1	-0.368435	0.00144951	0.0321529
ENSG00000145632.14	PLK2	0.533451	0.00109609	0.0256543
ENSG00000155893.12	PXYLP1	-1.48049	2.50191e-17	2.7907e-15
ENSG00000136811.16	ODF2	-0.549904	3.54195e-08	2.09512e-06
ENSG00000108179.13	PPIF	-0.449251	0.000148202	0.00457736
ENSG00000120149.8	MSX2	0.449723	0.000990087	0.023515
ENSG00000188610.12	FAM72B	-2.37276	8.59391e-07	4.27942e-05
ENSG00000285794.1	NA	-3.18974	0.000695627	0.0174308
ENSG00000004777.18	ARHGAP33	-0.951028	4.62625e-05	0.00166921
ENSG00000101447.14	FAM83D	-3.52477	1.02421e-63	3.7722e-61
ENSG00000175643.9	RMI2	-1.05109	2.30581e-06	0.000109246
ENSG00000162643.12	DNAI3	1.32298	1.85935e-12	1.58754e-10
ENSG00000154839.9	SKA1	-6.90162	1.05327e-05	0.000428331
ENSG00000128805.14	ARHGAP22	-0.479385	0.00143505	0.0318683
ENSG00000121152.9	NCAPH	-4.70589	5.11118e-165	1.9954e-161
ENSG00000159147.17	DONSON	-0.507805	6.53111e-05	0.00226846
ENSG00000277287.1	NA	0.88508	8.74483e-10	6.18475e-08
ENSG00000197451.11	HNRNPAB	-0.403385	0.000216085	0.00647922
ENSG00000136492.8	BRIP1	-2.09782	9.26374e-31	1.64389e-28
ENSG00000058804.11	NDC1	-0.875481	7.3492e-08	4.1824e-06
ENSG00000146263.11	MMS22L	-0.797471	1.24647e-05	0.000499612
ENSG00000166949.15	SMAD3	-0.234307	0.00170292	0.0366898
ENSG00000215784.5	FAM72D	-3.07395	1.0522e-12	9.37851e-11
ENSG00000183684.7	ALYREF	-0.436004	8.75083e-05	0.00288541
ENSG00000024526.16	DEPDC1	-4.38717	4.85729e-62	1.69311e-59
ENSG00000168876.8	ANKRD49	1.08672	4.08445e-07	2.13749e-05
ENSG00000176349.11	NA	-1.14396	7.60488e-05	0.00255944
ENSG00000244509.3	APOBEC3C	0.386258	8.21572e-06	0.000343406
ENSG00000164080.13	RAD54L2	0.66536	0.00171705	0.0369127
ENSG00000051341.13	POLQ	-4.87652	2.54301e-52	6.70804e-50
ENSG00000112081.16	SRSF3	-0.357974	1.37157e-05	0.000546388
ENSG00000149636.15	DSN1	-0.765117	1.42274e-10	1.05197e-08
ENSG00000012048.21	BRCA1	-2.06997	5.22048e-41	1.11982e-38
ENSG00000127423.10	AUNIP	-1.9116	1.15179e-10	8.64725e-09
ENSG00000115163.14	CENPA	-4.20264	6.37614e-73	2.89447e-70
ENSG00000149554.12	CHEK1	-0.645048	1.76066e-08	1.0876e-06
ENSG00000162735.18	PEX19	-0.340169	0.00188316	0.039826
ENSG00000180354.15	MTURN	-0.878111	0.000769767	0.0189915
ENSG00000125730.16	C3	0.4122	0.00239589	0.0488182
ENSG00000132274.15	TRIM22	0.468321	4.24323e-06	0.000191289
ENSG00000159239.13	NA	2.18446	3.05157e-07	1.63197e-05
ENSG00000189057.10	FAM111B	-4.75274	2.10795e-57	6.5313e-55
ENSG00000065809.13	FAM107B	-0.477014	3.98411e-06	0.00018044
ENSG00000087586.17	AURKA	-2.08231	2.65884e-43	6.10595e-41
ENSG00000173894.10	CBX2	-1.57931	6.29548e-09	4.08265e-07
ENSG00000106268.15	NUDT1	-0.688035	8.06343e-07	4.03585e-05
ENSG00000008118.9	CAMK1G	-0.86923	0.00203487	0.0423914
ENSG00000166073.10	GPR176	0.413602	3.95744e-05	0.00144504
ENSG00000150753.11	CCT5	-0.288864	0.00070287	0.0175672
ENSG00000221829.9	FANCG	-1.11556	5.15923e-10	3.71617e-08
ENSG00000111445.13	RFC5	-0.806683	3.06425e-08	1.84043e-06
ENSG00000166123.13	GPT2	-0.487569	0.00240761	0.0490057
ENSG00000117724.12	CENPF	-4.25208	1.87722e-108	1.74492e-105
ENSG00000014138.8	POLA2	-1.02464	4.26501e-06	0.00019172
ENSG00000124762.13	CDKN1A	0.96917	1.47622e-30	2.55006e-28
ENSG00000100285.9	NEFH	-0.693454	0.000101502	0.00329671
ENSG00000139343.10	SNRPF	-0.328008	0.00145347	0.032204
ENSG00000149503.12	INCENP	-1.18008	3.03614e-14	2.91948e-12
ENSG00000165072.9	MAMDC2	0.724953	2.71236e-12	2.26262e-10
ENSG00000151503.12	NCAPD3	-0.700798	1.20387e-11	9.75088e-10
ENSG00000093009.9	CDC45	-3.09937	2.37391e-30	4.06479e-28
ENSG00000106462.10	EZH2	-1.6574	4.08911e-44	9.61679e-42
ENSG00000088325.15	TPX2	-2.98904	1.93408e-97	1.30184e-94
ENSG00000137975.7	CLCA2	1.70366	1.79553e-14	1.76124e-12
ENSG00000171914.16	TLN2	-0.458957	6.3603e-07	3.24159e-05
ENSG00000111696.11	NT5DC3	-0.508843	0.000587589	0.0153544
ENSG00000160886.13	LY6K	-0.756802	2.05413e-09	1.42186e-07
ENSG00000148175.12	STOM	0.326638	0.00117146	0.0270935
ENSG00000102384.13	CENPI	-2.34127	2.14616e-19	2.66835e-17
ENSG00000103995.13	CEP152	-1.27802	1.29193e-10	9.5888e-09
ENSG00000080839.11	RBL1	-1.3847	2.00491e-24	2.87763e-22
ENSG00000117600.12	PLPPR4	0.446927	0.00041234	0.0113205
ENSG00000182199.10	SHMT2	-0.582809	6.30211e-06	0.000270963
ENSG00000176208.8	ATAD5	-2.30031	9.57783e-11	7.24648e-09
ENSG00000064199.6	SPA17	-0.630573	2.01935e-06	9.7088e-05
ENSG00000184661.13	CDCA2	-2.75162	6.62384e-42	1.46929e-39
ENSG00000198830.10	HMGN2	-0.706562	1.92008e-12	1.62956e-10
ENSG00000131351.14	HAUS8	-1.33573	1.31907e-16	1.44654e-14
ENSG00000172115.8	CYCS	-0.35148	0.00135491	0.0305402
ENSG00000196214.10	ZNF766	0.432945	0.00062284	0.0161245
ENSG00000176619.12	LMNB2	-1.10471	1.68869e-14	1.67326e-12
ENSG00000142188.16	TMEM50B	0.344755	0.000930329	0.0222549
ENSG00000167601.11	AXL	-0.415795	0.00011746	0.00375258
ENSG00000156804.7	FBXO32	0.468482	0.000352173	0.00990785
ENSG00000171793.14	CTPS1	-0.326834	0.000224185	0.00669126
ENSG00000187741.14	FANCA	-3.0266	1.84459e-54	5.14378e-52
ENSG00000123496.7	IL13RA2	0.797068	2.34827e-06	0.000110721
ENSG00000197044.10	ZNF441	0.520992	0.00198226	0.0414279
ENSG00000132749.10	TESMIN	-1.06453	1.13315e-05	0.000457952
ENSG00000198885.9	ITPRIPL1	-1.15879	0.000894724	0.0215009
ENSG00000159259.7	CHAF1B	-1.63884	3.59881e-19	4.41816e-17
ENSG00000101187.15	SLCO4A1	-0.698398	0.00118882	0.02743
ENSG00000154920.14	EME1	-2.9645	1.93592e-11	1.52993e-09
ENSG00000012171.19	SEMA3B	0.425548	0.00149815	0.0329695
ENSG00000080986.12	NDC80	-3.7907	1.2243e-154	3.41405e-151
ENSG00000119630.13	PGF	0.690847	2.6306e-07	1.41458e-05
ENSG00000152495.10	CAMK4	-0.941169	0.00065887	0.0167028
ENSG00000109881.16	CCDC34	-0.897193	7.42268e-09	4.78187e-07
ENSG00000197852.10	INKA2	0.907118	1.42361e-11	1.13855e-09
ENSG00000183172.8	SMDT1	0.868403	7.88898e-05	0.00264593
ENSG00000168496.3	FEN1	-1.61407	3.96922e-23	5.53422e-21
ENSG00000072501.17	SMC1A	-0.460773	6.31253e-07	3.22567e-05
ENSG00000007968.6	E2F2	-5.39289	7.37728e-07	3.74037e-05
ENSG00000169994.18	MYO7B	-1.63368	8.4153e-05	0.00279365
ENSG00000181938.13	GINS3	-1.7587	1.99087e-13	1.84179e-11
ENSG00000138346.14	DNA2	-1.26356	1.01281e-08	6.39809e-07
ENSG00000183668.17	PSG9	0.364966	0.000896607	0.0215009
ENSG00000257167.2	TMPO-AS1	-4.1093	2.15094e-22	2.95679e-20
ENSG00000149136.8	SSRP1	-0.419364	0.000105268	0.00340767
ENSG00000100242.15	SUN2	-0.517795	3.69154e-05	0.0013596
ENSG00000168476.11	REEP4	-0.567079	0.000817021	0.0199444
ENSG00000149716.12	LTO1	-0.825889	3.33242e-08	1.98926e-06
ENSG00000184156.16	KCNQ3	1.0566	0.000115467	0.00369494
ENSG00000161888.11	SPC24	-3.15248	1.03879e-29	1.76323e-27
ENSG00000184162.14	NR2C2AP	-0.85094	1.4215e-05	0.000562832
ENSG00000177084.16	POLE	-0.921987	7.02508e-16	7.37256e-14
ENSG00000119397.16	CNTRL	-0.667547	4.04551e-07	2.12281e-05
ENSG00000168672.3	LRATD2	0.592432	8.84411e-05	0.00290146
ENSG00000006634.7	DBF4	-0.902163	2.23165e-06	0.000106248
ENSG00000152784.15	PRDM8	-0.552282	0.000328884	0.00934471
ENSG00000170629.14	DPY19L2P2	-1.73115	8.30519e-09	5.29795e-07
ENSG00000136404.15	TM6SF1	-1.09616	0.000476758	0.0128718
ENSG00000172716.16	SLFN11	-0.777901	8.73513e-06	0.000360747
ENSG00000166851.14	PLK1	-3.99573	8.10102e-193	5.27106e-189
ENSG00000272196.2	H2AC19	0.625195	0.000129381	0.00408949
ENSG00000177602.5	HASPIN	-1.84002	4.36146e-15	4.45737e-13
ENSG00000189159.15	JPT1	-0.533937	5.66783e-05	0.00199071
ENSG00000096060.14	FKBP5	-1.51073	3.48765e-12	2.89698e-10
ENSG00000162066.15	AMDHD2	-0.514678	0.000464299	0.0125877
ENSG00000137135.17	ARHGEF39	-2.20395	1.6974e-12	1.47259e-10
ENSG00000135045.6	C9orf40	-0.472203	0.000268286	0.00782422
ENSG00000135362.13	PRR5L	-0.97138	0.000547737	0.014468
ENSG00000139734.18	DIAPH3	-1.52044	1.77732e-36	3.57663e-34
ENSG00000131080.14	EDA2R	0.457111	0.000112909	0.00362498
ENSG00000132780.16	NASP	-0.828423	3.32645e-09	2.21612e-07
ENSG00000196517.11	SLC6A9	-0.566416	0.000139725	0.00434998
ENSG00000167740.9	CYB5D2	0.346961	0.00067443	0.0170089
ENSG00000075218.18	GTSE1	-4.47909	9.12487e-82	4.81398e-79
ENSG00000100479.12	POLE2	-2.47044	1.84125e-15	1.91176e-13
ENSG00000123975.4	CKS2	-1.46381	3.85411e-19	4.70202e-17
ENSG00000197299.11	BLM	-3.06487	1.28491e-25	1.9001e-23
ENSG00000059377.16	TBXAS1	-5.27071	0.00039386	0.0108897
ENSG00000109674.3	NEIL3	-2.70876	7.13076e-18	8.13991e-16
ENSG00000119915.4	ELOVL3	0.908713	0.000282183	0.00816032
ENSG00000081051.7	AFP	-5.06268	0.000675645	0.0170175
ENSG00000075651.15	PLD1	0.387384	0.000318304	0.00909706
ENSG00000256646.7	NA	7.73095	0.00074922	0.0185407
ENSG00000133048.12	CHI3L1	0.825029	6.05925e-05	0.00212346
ENSG00000102317.17	RBM3	-0.292107	0.00118823	0.02743
ENSG00000164032.11	H2AZ1	-0.961295	1.76736e-12	1.51978e-10
ENSG00000164125.15	GASK1B	0.644973	0.000339533	0.00959144
ENSG00000230918.1	DPP4-DT	0.845924	0.000437399	0.0119246
ENSG00000167670.15	CHAF1A	-1.20693	2.2268e-13	2.05033e-11
ENSG00000133119.12	RFC3	-1.93271	1.54596e-17	1.74434e-15
ENSG00000136938.8	ANP32B	-0.404865	0.000114698	0.00367637
ENSG00000259091.1	LINC00517	-1.4784	5.57971e-06	0.000245306
ENSG00000125378.15	BMP4	0.318737	0.000177425	0.0053946
ENSG00000137267.5	TUBB2A	-0.322048	0.00108557	0.0254386
ENSG00000261487.1	NA	0.617203	0.000653346	0.0166492
ENSG00000090861.15	AARS1	-0.359555	0.00096347	0.0229623
ENSG00000122952.16	ZWINT	-2.3262	3.32487e-32	6.12278e-30
ENSG00000228716.6	DHFR	-1.13362	2.99403e-11	2.33774e-09
ENSG00000244694.7	PTCHD4	0.539242	2.16776e-07	1.17215e-05
ENSG00000189403.14	HMGB1	-0.531989	0.00233233	0.0478226
ENSG00000162063.12	CCNF	-2.0666	2.06938e-35	3.99943e-33
ENSG00000228594.3	FNDC10	-0.544278	7.56732e-05	0.00255561
ENSG00000035499.12	DEPDC1B	-4.65049	6.26825e-42	1.40639e-39
ENSG00000102007.10	PLP2	-0.515193	8.24845e-06	0.000344038
ENSG00000134222.16	PSRC1	-1.97868	1.43873e-46	3.51051e-44
ENSG00000161544.9	CYGB	1.34605	1.31355e-15	1.37115e-13
ENSG00000167992.12	VWCE	1.06431	3.01021e-10	2.209e-08
ENSG00000196584.2	XRCC2	-2.58432	4.08709e-16	4.33587e-14
ENSG00000137563.11	GGH	-0.787822	7.10587e-08	4.05575e-06
ENSG00000167747.14	C19orf48	-0.669941	1.44545e-05	0.000570004
ENSG00000104889.6	RNASEH2A	-1.87436	2.16961e-21	2.90074e-19
ENSG00000171872.4	KLF17	-1.69952	3.17576e-06	0.000145861
ENSG00000205464.12	ATP6AP1L	0.763921	0.00213632	0.0441748
ENSG00000198856.12	OSTC	0.46461	7.21152e-05	0.0024567
ENSG00000141576.15	RNF157	-0.939663	3.23477e-05	0.00119815
ENSG00000111247.14	RAD51AP1	-3.03531	2.56357e-59	8.48151e-57
ENSG00000155189.11	AGPAT5	-0.740453	0.00125393	0.0285943
ENSG00000100629.16	CEP128	-1.78782	3.02682e-14	2.91948e-12
ENSG00000077152.10	UBE2T	-1.90816	1.34049e-35	2.61664e-33
ENSG00000011332.19	DPF1	-1.28711	4.90335e-05	0.00175621
ENSG00000172831.11	CES2	0.319966	0.00111187	0.0259614
ENSG00000205476.8	CCDC85C	-0.332109	0.000811804	0.01991
ENSG00000270607.1	NA	-0.6288	0.000682345	0.01712
ENSG00000163918.10	RFC4	-1.18294	2.73314e-15	2.8228e-13
ENSG00000140848.16	CPNE2	-0.449106	2.86841e-05	0.00108511
ENSG00000169683.7	LRRC45	-0.538905	0.000626948	0.0162093
ENSG00000138685.15	FGF2	0.477627	2.42168e-05	0.000928708
ENSG00000145375.7	SPATA5	-0.467046	0.000646745	0.0165026
ENSG00000267748.4	NA	-6.39427	3.10522e-05	0.00116119
ENSG00000179163.11	FUCA1	0.595291	1.32067e-12	1.1665e-10
ENSG00000146918.19	NCAPG2	-1.72896	3.51154e-25	5.15379e-23
ENSG00000123219.12	CENPK	-2.1822	6.28949e-24	8.96138e-22
ENSG00000163520.13	FBLN2	0.423227	0.000133513	0.00417655
ENSG00000261061.1	NA	-1.02285	5.30425e-07	2.74639e-05
ENSG00000010292.12	NCAPD2	-0.924752	8.70292e-13	7.79271e-11
ENSG00000154736.5	ADAMTS5	0.46931	0.000529001	0.01403
ENSG00000151849.14	CENPJ	-0.808642	7.74884e-07	3.91858e-05
ENSG00000270276.2	H4C15	0.917684	0.000990782	0.023515
ENSG00000204131.9	NHSL2	-0.797197	0.000964605	0.0229623
ENSG00000160200.17	CBS	-0.7039	6.5495e-05	0.00227081
ENSG00000263753.7	LINC00667	0.909429	1.4706e-05	0.000578751
ENSG00000170855.3	TRIAP1	0.47857	7.94056e-05	0.00265866
ENSG00000245694.9	CRNDE	-0.756898	4.52522e-06	0.000202597
ENSG00000168077.13	SCARA3	-1.31846	2.25643e-18	2.63745e-16
ENSG00000273213.2	H3-2	-1.09186	1.68628e-06	8.14755e-05
ENSG00000066279.17	ASPM	-2.19749	1.27835e-20	1.66356e-18
ENSG00000026103.21	FAS	0.405709	0.000584093	0.0152835
ENSG00000267201.1	LINC01775	-3.21531	7.34379e-05	0.00249306
ENSG00000198056.13	PRIM1	-2.12748	1.47673e-16	1.60143e-14
ENSG00000162073.13	PAQR4	-1.68646	2.63357e-06	0.000123279
ENSG00000135842.16	NIBAN1	-0.772452	2.88064e-09	1.95243e-07
ENSG00000117399.13	CDC20	-4.78219	1.11799e-180	5.45577e-177
ENSG00000147642.16	SYBU	-0.588404	0.00121047	0.0278308
ENSG00000166508.17	MCM7	-1.71222	1.25416e-30	2.18582e-28
ENSG00000090889.11	KIF4A	-4.44798	7.56985e-56	2.23884e-53
ENSG00000011426.10	ANLN	-3.87422	7.34062e-132	1.19407e-128
ENSG00000203995.9	ZYG11A	-1.02772	0.000817393	0.0199444
ENSG00000013810.18	TACC3	-2.46682	6.3304e-36	1.24818e-33
ENSG00000050438.16	SLC4A8	-0.627895	5.55935e-06	0.000244963
ENSG00000180155.19	LYNX1	0.738569	9.5183e-12	7.74155e-10
ENSG00000116209.11	TMEM59	0.343456	0.000509092	0.013613
ENSG00000068489.12	PRR11	-2.86933	4.32648e-37	8.88978e-35
ENSG00000116830.11	TTF2	-0.41588	4.40224e-05	0.00159724
ENSG00000136450.12	SRSF1	-0.294452	0.000816484	0.0199444
ENSG00000065357.19	DGKA	0.339652	0.000132067	0.00415129
ENSG00000197472.14	ZNF695	-2.04511	0.000537569	0.0142379
ENSG00000062822.13	POLD1	-1.25964	1.31006e-14	1.31141e-12
ENSG00000139514.12	SLC7A1	-0.470335	8.81134e-05	0.00289754
ENSG00000197457.9	STMN3	-0.426025	0.000245482	0.00723837
ENSG00000104447.12	TRPS1	0.377158	5.46203e-05	0.00194205
ENSG00000189058.8	APOD	0.648925	4.24233e-09	2.81668e-07
ENSG00000169689.14	CENPX	-0.402543	0.000847217	0.0205182
ENSG00000203812.2	H2AC18	0.559081	0.00189695	0.0399875
ENSG00000141499.16	WRAP53	-0.78569	1.39369e-06	6.8012e-05
ENSG00000253352.9	TUG1	0.534747	0.000278188	0.00805672
ENSG00000244405.7	ETV5	-0.358418	0.000869482	0.0210313
ENSG00000165071.14	TMEM71	-3.38278	4.51115e-15	4.58633e-13
ENSG00000213347.10	MXD3	-2.20402	3.00922e-52	7.83199e-50
ENSG00000154146.12	NRGN	-2.49702	4.59672e-07	2.39762e-05
ENSG00000164237.8	CMBL	0.402091	7.59417e-05	0.00255944
ENSG00000061337.15	LZTS1	-0.830604	6.84394e-05	0.00234787
ENSG00000181191.11	PJA1	0.965218	0.00188281	0.039826
ENSG00000185347.17	TEDC1	-1.33972	8.69349e-06	0.000360291
ENSG00000124813.21	RUNX2	-0.773082	0.000668962	0.0169366
ENSG00000148773.13	MKI67	-4.96425	9.3296e-209	1.82114e-204
ENSG00000117632.22	STMN1	-1.19667	3.80493e-16	4.05859e-14
ENSG00000164050.12	PLXNB1	0.403721	0.000499843	0.0134393
ENSG00000128578.9	STRIP2	-1.37064	9.68116e-10	6.79771e-08
ENSG00000102359.6	SRPX2	0.310229	0.0013995	0.0312567
ENSG00000285314.1	NA	11.8024	0.000415638	0.011395
ENSG00000164109.13	MAD2L1	-2.59057	8.39895e-47	2.07528e-44
ENSG00000135476.11	ESPL1	-2.19628	1.20241e-30	2.1145e-28
ENSG00000119969.14	HELLS	-1.66143	1.77897e-13	1.65359e-11
ENSG00000105696.8	TMEM59L	0.669185	0.000811392	0.01991
ENSG00000169813.16	HNRNPF	-0.308699	0.000550645	0.0145251
ENSG00000103647.12	CORO2B	-0.535782	0.000277861	0.00805672
ENSG00000196605.7	ZNF846	0.450784	0.00212662	0.0440699
ENSG00000104177.17	MYEF2	-0.463828	3.1777e-05	0.0011815
ENSG00000121039.9	RDH10	0.438585	0.00169772	0.0366182
ENSG00000096746.17	HNRNPH3	-0.372943	2.85009e-05	0.00108027
ENSG00000240747.7	KRBOX1	-0.774211	7.66721e-05	0.00257597
ENSG00000197415.11	VEPH1	-0.421237	0.00129517	0.0293631
ENSG00000132436.11	FIGNL1	-0.951337	0.000142564	0.00441724
ENSG00000097046.12	CDC7	-1.06498	1.50618e-08	9.33356e-07
ENSG00000180573.9	H2AC6	1.04241	7.2005e-06	0.000304889
ENSG00000167772.11	ANGPTL4	0.682027	0.000421884	0.01155
ENSG00000123485.11	HJURP	-2.771	1.29126e-57	4.06538e-55
ENSG00000113810.15	SMC4	-0.910925	1.27996e-11	1.02818e-09
ENSG00000101057.15	MYBL2	-5.03166	2.2032e-164	7.16775e-161
ENSG00000092820.17	EZR	-0.512748	5.89887e-06	0.00025588
ENSG00000187840.4	EIF4EBP1	-0.992279	8.49121e-08	4.81827e-06
ENSG00000186281.12	GPAT2	-0.443092	0.000251872	0.00740443
ENSG00000091656.16	ZFHX4	0.481356	7.28034e-05	0.00247582
ENSG00000267001.1	NA	5.2207	0.00065816	0.0167028
ENSG00000091128.12	LAMB4	-4.74368	0.000305326	0.00876466
ENSG00000254154.8	SEC16B	-1.89246	3.49461e-06	0.00015938
ENSG00000149926.13	TLCD3B	-1.8292	0.000871173	0.0210462
ENSG00000136122.15	BORA	-0.779589	0.000106687	0.00344738
ENSG00000120725.12	SIL1	0.294649	0.00216955	0.044767
ENSG00000168961.16	LGALS9	-1.02491	1.32059e-06	6.49316e-05
ENSG00000142945.12	KIF2C	-4.78006	1.91241e-122	2.33314e-119
ENSG00000223749.9	MIR503HG	-0.878345	8.15795e-05	0.00272211
ENSG00000123374.10	CDK2	-0.977253	1.26288e-13	1.19089e-11
ENSG00000132016.11	BRME1	-1.10597	8.26108e-05	0.00275181
ENSG00000167193.7	CRK	-0.545378	0.0016427	0.0356679
ENSG00000160957.12	RECQL4	-2.14398	9.68764e-24	1.37031e-21
ENSG00000225791.6	TRAM2-AS1	0.689133	0.00014091	0.00437292
ENSG00000234546.3	LNCTAM34A	0.482589	2.37694e-05	0.000913344
ENSG00000273003.1	ARL2-SNX15	1.63004	0.00121288	0.027849
ENSG00000230006.7	ANKRD36BP2	-5.83902	4.55355e-05	0.00164602
ENSG00000112877.7	CEP72	-1.30767	3.94239e-08	2.30405e-06
ENSG00000170836.11	PPM1D	0.456905	1.32964e-05	0.000531855
ENSG00000110900.14	TSPAN11	0.95925	7.26358e-12	5.98249e-10
ENSG00000139364.10	TMEM132B	0.392009	3.71521e-05	0.00136574
ENSG00000242288.9	BMS1P4-AGAP5	-1.5714	0.000575623	0.0150821
ENSG00000104689.9	TNFRSF10A	0.50233	6.264e-05	0.00218752
ENSG00000115525.17	ST3GAL5	-0.467288	0.00123314	0.0281861
ENSG00000103966.10	EHD4	-0.361712	0.000257351	0.00754278
ENSG00000236565.3	HNRNPA3P5	-0.73537	0.00189582	0.0399875
ENSG00000127528.5	KLF2	-0.556535	6.78771e-05	0.00233268
ENSG00000137812.19	KNL1	-3.6232	8.4029e-82	4.55624e-79
ENSG00000224578.5	HNRNPA1P48	-0.442507	0.000135809	0.00424159
ENSG00000145386.9	CCNA2	-3.44889	6.58369e-202	6.42568e-198
ENSG00000068078.18	FGFR3	-1.68416	2.21516e-06	0.00010598
ENSG00000276043.4	UHRF1	-2.12136	6.75402e-45	1.60779e-42
ENSG00000158604.14	TMED4	0.254677	0.000741958	0.0184028
ENSG00000152455.15	SUV39H2	-1.02264	1.20599e-07	6.726e-06
ENSG00000147601.13	TERF1	0.581959	0.000133252	0.0041751
ENSG00000167862.9	MRPL58	-0.534898	0.00131689	0.0298209
ENSG00000116183.10	PAPPA2	-0.82742	0.00102075	0.0241809
ENSG00000071539.13	TRIP13	-2.74441	4.91683e-45	1.1849e-42
ENSG00000065911.11	MTHFD2	-0.745973	3.17724e-09	2.12396e-07
ENSG00000176597.11	B3GNT5	-1.03657	0.00211551	0.0439306
ENSG00000168393.12	DTYMK	-0.770289	3.00271e-06	0.000138565
ENSG00000100889.11	PCK2	-0.678713	7.93029e-07	3.97942e-05
ENSG00000170144.20	HNRNPA3	-0.379757	0.00132087	0.0298765
ENSG00000244187.7	TMEM141	0.622542	5.73265e-08	3.29122e-06
ENSG00000213024.11	NUP62	-0.334475	0.00205979	0.0428646
ENSG00000129173.12	E2F8	-9.18044	2.56539e-12	2.1492e-10
ENSG00000138160.5	KIF11	-2.92758	1.33475e-111	1.37128e-108
ENSG00000127241.16	MASP1	0.360048	0.00177992	0.0380307
ENSG00000234664.1	HMGN2P5	-0.853951	2.29083e-06	0.000108801
ENSG00000174371.16	EXO1	-2.89903	4.16338e-59	1.35449e-56
ENSG00000152377.13	SPOCK1	0.263211	0.000593301	0.0154829
ENSG00000067057.16	PFKP	-0.402337	0.0012733	0.0289683
ENSG00000188312.13	CENPP	-1.39153	3.29803e-11	2.56484e-09
ENSG00000262246.5	CORO7	-0.551826	5.28631e-05	0.00188301
ENSG00000157693.14	TMEM268	-0.358838	0.00105546	0.0249141
ENSG00000128408.8	RIBC2	-3.19455	1.71525e-14	1.69099e-12
ENSG00000158164.6	TMSB15A	-3.99092	1.21799e-08	7.59587e-07
ENSG00000116670.14	MAD2L2	-0.43278	0.00182347	0.0387314
ENSG00000260442.5	ATP2A1-AS1	-1.28362	0.00166683	0.0361517
ENSG00000188486.3	H2AX	-1.17441	4.48385e-11	3.44585e-09
ENSG00000135373.12	EHF	0.620344	0.00033144	0.00939001
ENSG00000127989.13	MTERF1	0.813111	1.14131e-05	0.000460299
ENSG00000130816.15	DNMT1	-0.80113	9.59555e-14	9.18162e-12
ENSG00000249306.5	LINC01411	0.8049	3.12498e-06	0.000143867
ENSG00000185760.15	KCNQ5	-0.66602	1.17374e-06	5.81507e-05
ENSG00000111331.12	OAS3	-0.835328	1.83457e-07	1.0031e-05
ENSG00000165209.18	STRBP	-0.687943	3.17661e-05	0.0011815
ENSG00000101224.17	CDC25B	-0.504977	5.95307e-06	0.000257659
ENSG00000071626.16	DAZAP1	-0.545275	4.69576e-05	0.00168495
ENSG00000213390.10	ARHGAP19	-0.609046	5.86862e-06	0.000255352
ENSG00000115687.13	PASK	-1.34624	1.42902e-11	1.13855e-09
ENSG00000159055.3	MIS18A	-0.923855	2.94074e-10	2.16616e-08
ENSG00000182504.10	CEP97	-0.423612	0.00188682	0.0398601
ENSG00000101773.18	RBBP8	-0.461385	0.000357618	0.0100297
ENSG00000127586.16	CHTF18	-1.43096	7.71298e-20	9.77645e-18
ENSG00000188985.6	DHFRP1	-1.48327	1.1043e-05	0.000448148
ENSG00000143476.17	DTL	-4.27792	4.61877e-122	5.30344e-119
ENSG00000109670.14	FBXW7	0.364407	0.00202285	0.0421859
ENSG00000185862.6	EVI2B	-3.00839	3.35582e-08	1.99712e-06
ENSG00000139998.15	RAB15	-0.527216	0.000341412	0.00963057
ENSG00000005189.19	REXO5	-1.02839	4.65907e-10	3.38086e-08
ENSG00000163781.13	TOPBP1	-0.451099	0.000311611	0.00893193
ENSG00000166451.13	CENPN	-0.975849	6.37599e-11	4.86169e-09
ENSG00000145819.16	ARHGAP26	-0.800016	2.00665e-08	1.22789e-06
ENSG00000131470.14	PSMC3IP	-2.15231	5.7221e-19	6.89478e-17
ENSG00000175063.16	UBE2C	-4.49851	9.40468e-108	8.34452e-105
ENSG00000256061.7	DNAAF4	-1.41988	0.00137677	0.0309257
ENSG00000146670.9	CDCA5	-3.24142	1.21137e-53	3.33042e-51
ENSG00000180596.7	H2BC4	0.946108	4.58067e-06	0.00020461
ENSG00000176887.6	SOX11	-1.98338	3.6723e-06	0.000167094
ENSG00000109685.17	NSD2	-1.07668	1.51238e-05	0.000593996
ENSG00000203760.8	CENPW	-1.90883	8.95454e-27	1.37632e-24
ENSG00000114023.15	FAM162A	0.427502	0.000423366	0.0115744
ENSG00000185262.8	UBALD2	-0.532497	0.000607811	0.0157982
ENSG00000184635.15	ZNF93	-0.881971	5.61158e-05	0.00198561
ENSG00000117533.14	VAMP4	0.464199	0.00142887	0.0318396
ENSG00000242498.7	ARPIN	-0.415649	8.11963e-06	0.00034085
ENSG00000170779.10	CDCA4	-1.26849	1.03766e-19	1.30678e-17
ENSG00000164045.11	CDC25A	-0.864548	0.00013246	0.00415694
ENSG00000123136.14	DDX39A	-0.910126	1.16831e-10	8.73773e-09
ENSG00000250337.5	PURPL	0.916143	0.000612088	0.0158882
ENSG00000126368.5	NR1D1	-0.480353	0.000397207	0.0109512
ENSG00000182481.8	KPNA2	-1.00897	1.6202e-21	2.18113e-19
ENSG00000077157.21	PPP1R12B	1.10549	0.000478304	0.0128957
ENSG00000048392.11	RRM2B	0.546895	0.00106568	0.025093
ENSG00000170540.14	ARL6IP1	-0.934226	1.43195e-14	1.42611e-12
ENSG00000147274.14	RBMX	-0.307525	0.00178242	0.0380307
ENSG00000169604.19	ANTXR1	0.330789	0.000255825	0.00750934
ENSG00000104880.17	ARHGEF18	-0.545595	1.3245e-06	6.49603e-05
ENSG00000101003.9	GINS1	-1.78678	3.58153e-16	3.84129e-14
ENSG00000242265.5	PEG10	-1.56983	1.21871e-06	6.02258e-05
ENSG00000197013.9	ZNF429	0.519538	0.00177085	0.0379025
ENSG00000149548.14	CCDC15	-1.01378	4.06691e-08	2.36973e-06
ENSG00000259768.5	NA	-0.686524	0.000138956	0.00433294
ENSG00000136824.18	SMC2	-0.509441	0.000642428	0.0164139
ENSG00000165304.7	MELK	-2.20605	1.01164e-37	2.10077e-35
ENSG00000163009.9	NA	-6.02362	0.000245425	0.00723837
ENSG00000168918.13	INPP5D	1.03373	3.30971e-07	1.76037e-05
ENSG00000171208.9	NETO2	-1.12491	5.46416e-06	0.00024186
ENSG00000100612.13	DHRS7	0.304911	0.00135123	0.0304926
ENSG00000183856.10	IQGAP3	-4.7707	3.555e-132	6.30851e-129
ENSG00000231721.7	LINC-PINT	1.13718	0.000377549	0.0104833
ENSG00000111206.12	FOXM1	-1.36859	2.72723e-11	2.13797e-09
ENSG00000176749.8	CDK5R1	-0.537751	0.00212673	0.0440699
ENSG00000011465.16	DCN	0.37078	0.000407643	0.0112073
ENSG00000176890.15	TYMS	-1.29903	5.00288e-20	6.42475e-18
ENSG00000099783.11	HNRNPM	-0.473611	2.92494e-06	0.000135296
ENSG00000214826.5	DDX12P	-1.78698	6.21335e-13	5.64115e-11
ENSG00000175567.8	UCP2	-0.528525	0.000194832	0.0058963
ENSG00000274825.1	NA	-4.45204	9.40516e-05	0.00307519
ENSG00000205208.4	C4orf46	-0.776182	1.61617e-12	1.41469e-10
ENSG00000171848.14	RRM2	-4.10331	1.85739e-75	9.06407e-73
ENSG00000072571.19	HMMR	-4.53332	8.91395e-52	2.28948e-49
ENSG00000149968.11	MMP3	0.555218	8.07213e-06	0.000339586
ENSG00000135451.12	TROAP	-4.48151	5.79113e-79	2.97481e-76
ENSG00000242779.6	ZNF702P	0.459616	0.00234937	0.048071
ENSG00000114346.13	ECT2	-0.601608	5.84074e-07	3.0003e-05
ENSG00000167088.10	SNRPD1	-0.430196	0.000939807	0.0224541
ENSG00000198176.12	TFDP1	-0.363685	0.00137507	0.0309232
ENSG00000157680.15	DGKI	0.762216	0.00242607	0.0491898
ENSG00000188004.10	SNHG28	11.0078	0.000991437	0.023515
ENSG00000161692.17	DBF4B	-0.885842	1.35096e-09	9.45189e-08
ENSG00000157111.12	TMEM171	-0.451937	0.00105553	0.0249141
ENSG00000176974.19	SHMT1	-1.48151	5.58117e-21	7.41118e-19
ENSG00000112759.17	SLC29A1	-0.352757	0.00167883	0.036302
ENSG00000118193.11	KIF14	-4.64719	1.94208e-70	8.24117e-68
ENSG00000160293.16	VAV2	-0.387767	0.00160387	0.0349413
ENSG00000163017.13	ACTG2	-0.997395	1.78106e-07	9.76579e-06
ENSG00000125538.11	IL1B	0.459339	0.000363903	0.0101477
ENSG00000278023.5	RDM1	-6.04224	0.000176021	0.00536028
ENSG00000136542.8	GALNT5	0.451988	2.08252e-08	1.2667e-06
ENSG00000134802.17	SLC43A3	-0.690642	5.67821e-07	2.93224e-05
ENSG00000241634.1	RPL13P8	-1.82823	9.09551e-05	0.00297893
ENSG00000159461.14	AMFR	0.532115	5.66639e-05	0.00199071
ENSG00000165244.6	ZNF367	-3.7264	2.1496e-84	1.19886e-81
ENSG00000026559.13	KCNG1	-0.852363	3.47943e-07	1.84061e-05
ENSG00000165891.15	E2F7	-1.33742	8.26214e-21	1.08971e-18
ENSG00000068079.7	IFI35	-0.472422	0.00178269	0.0380307
ENSG00000040199.18	PHLPP2	-0.374882	0.00177043	0.0379025
ENSG00000040275.16	SPDL1	-0.773027	5.4708e-13	4.99019e-11
ENSG00000131747.14	TOP2A	-3.80054	3.94567e-129	5.50139e-126
ENSG00000134321.11	RSAD2	-1.06768	0.000362063	0.0101253
ENSG00000126822.16	PLEKHG3	-0.609084	4.00491e-06	0.000180963
ENSG00000077942.18	FBLN1	0.451883	4.66763e-05	0.00167794
ENSG00000182010.10	RTKN2	-1.72512	1.2293e-06	6.05959e-05
ENSG00000101255.10	TRIB3	-0.623663	2.0183e-07	1.09437e-05
ENSG00000159231.5	CBR3	-0.41813	0.000130794	0.00411789
ENSG00000100526.19	CDKN3	-3.00092	4.61222e-41	1.00034e-38
ENSG00000120889.12	TNFRSF10B	0.303638	0.00033923	0.00959144
ENSG00000151725.11	CENPU	-3.17265	1.2839e-64	4.91408e-62
ENSG00000167513.8	CDT1	-3.41923	3.07805e-74	1.43056e-71
ENSG00000164611.12	PTTG1	-2.26565	3.2315e-35	6.18421e-33
ENSG00000088247.17	KHSRP	-0.292008	0.00150815	0.0331522
ENSG00000189308.10	LIN54	-0.379129	0.000466245	0.0126229
ENSG00000197977.3	ELOVL2	-1.16073	0.000129473	0.00408949
ENSG00000178445.9	GLDC	-3.9501	0.000501081	0.0134541
ENSG00000224126.2	NA	-1.23756	3.22612e-06	0.000147826
ENSG00000129534.13	MIS18BP1	-0.563467	0.000698383	0.0174775
ENSG00000137310.11	TCF19	-1.81309	4.28889e-15	4.40627e-13
ENSG00000051180.16	RAD51	-2.04178	8.98282e-42	1.97016e-39
ENSG00000094804.10	CDC6	-3.31099	1.2813e-54	3.62477e-52
ENSG00000162745.10	OLFML2B	-1.17216	2.3261e-19	2.87376e-17
ENSG00000184445.11	KNTC1	-1.23592	8.20452e-18	9.31118e-16
ENSG00000138162.18	TACC2	-0.380867	0.000329654	0.00935298
ENSG00000144554.10	FANCD2	-2.27786	2.17795e-55	6.34531e-53
ENSG00000285077.1	ARHGAP11B	-2.00643	6.6332e-05	0.00228763
ENSG00000142731.10	PLK4	-2.68968	1.31252e-49	3.32733e-47
ENSG00000141994.15	DUS3L	-0.484405	0.00197222	0.0412622
ENSG00000261611.6	NA	2.52581	0.000118044	0.00376505
ENSG00000111602.11	TIMELESS	-1.38755	4.28763e-36	8.54025e-34
ENSG00000186193.8	SAPCD2	-4.39814	3.44455e-48	8.6202e-46
ENSG00000047249.17	ATP6V1H	0.374572	0.000813739	0.01993
ENSG00000268861.6	ARHGEF18	4.35589	5.20156e-08	2.99512e-06
ENSG00000137807.15	KIF23	-2.50421	8.80089e-64	3.30372e-61
ENSG00000175600.15	SUGCT	0.749112	1.26025e-10	9.38931e-09
ENSG00000077514.8	POLD3	-0.924481	1.36932e-12	1.20401e-10
ENSG00000267500.1	ZNF887P	-6.61502	5.77167e-06	0.000252042
ENSG00000089127.12	OAS1	-0.740241	0.00168861	0.0364621
ENSG00000132481.6	TRIM47	-0.664836	5.60233e-09	3.64525e-07
ENSG00000178752.15	ERFE	-1.64053	5.62355e-05	0.00198561
ENSG00000267886.1	NA	-2.93894	0.00032397	0.00923195
ENSG00000265817.2	FSBP	-1.65538	9.80102e-05	0.00319392
ENSG00000175305.17	CCNE2	-4.35383	5.08698e-26	7.63829e-24
ENSG00000102172.15	SMS	-0.477365	4.63299e-07	2.40521e-05
ENSG00000267374.1	MIR924HG	-1.50912	0.000246364	0.00725344
ENSG00000137804.12	NUSAP1	-3.42503	9.99911e-126	1.30122e-122
ENSG00000198932.12	GPRASP1	1.24279	0.000179306	0.00544333
ENSG00000197635.9	DPP4	0.404558	0.00031796	0.00909706
ENSG00000124098.9	FAM210B	0.4375	0.000128672	0.00407739
ENSG00000106236.3	NPTX2	-2.22282	9.99426e-08	5.60597e-06
ENSG00000105976.14	MET	-0.385474	1.01245e-05	0.000412591
ENSG00000111261.13	MANSC1	1.03646	0.000277309	0.00805517
ENSG00000214189.9	NA	-0.968997	8.19404e-06	0.000343235
ENSG00000108932.11	SLC16A6	0.922566	0.000951563	0.0227072
ENSG00000120341.18	SEC16B	1.95284	9.45726e-06	0.000387827
ENSG00000162894.11	FCMR	0.562545	0.00159807	0.034854
ENSG00000198826.10	ARHGAP11A	-1.74468	1.93355e-34	3.62913e-32
ENSG00000137033.11	IL33	0.98013	3.08752e-05	0.00115678
ENSG00000168062.9	BATF2	-0.502508	0.00220239	0.0453488
ENSG00000167323.11	STIM1	-0.267699	0.000840541	0.0204072
ENSG00000138587.5	MNS1	-1.33221	6.94101e-06	0.000295827
ENSG00000058056.8	USP13	-0.375231	0.000359389	0.0100649
ENSG00000171791.12	BCL2	-1.63073	0.00149388	0.0329126
ENSG00000136068.14	FLNB	-0.679654	2.28554e-11	1.79895e-09
ENSG00000229676.2	ZNF492	-6.22459	8.07738e-05	0.00269984
ENSG00000157456.7	CCNB2	-3.39094	8.42265e-100	6.08926e-97
ENSG00000164649.19	CDCA7L	-0.589468	1.08027e-08	6.80222e-07
ENSG00000153820.12	SPHKAP	-0.704025	0.000106848	0.00344738
ENSG00000128272.14	ATF4	-0.395503	0.000720355	0.0179125
ENSG00000090238.11	YPEL3	0.305591	0.00121452	0.027849
ENSG00000250786.1	SNHG18	0.267234	0.00143472	0.0318683
ENSG00000156802.12	ATAD2	-1.05523	2.97352e-18	3.43451e-16
ENSG00000120053.11	GOT1	-0.456925	0.000140907	0.00437292
ENSG00000170312.15	CDK1	-4.21695	1.30078e-95	8.46371e-93
ENSG00000131153.8	GINS2	-3.33059	2.17036e-43	5.0435e-41
ENSG00000129195.15	PIMREG	-3.7199	7.26071e-29	1.20109e-26
ENSG00000181544.14	FANCB	-1.27965	0.000327244	0.00931166
ENSG00000120875.8	DUSP4	0.448926	0.000267064	0.00780404
ENSG00000182378.13	PLCXD1	-0.412235	0.00163133	0.0354605
ENSG00000170271.10	FAXDC2	0.424268	0.000223946	0.00669126
ENSG00000158985.13	CDC42SE2	0.961892	7.83331e-07	3.94088e-05
ENSG00000171320.14	ESCO2	-4.2562	4.23885e-38	8.89702e-36
ENSG00000170632.13	ARMC10	0.356316	0.00128466	0.0291928
ENSG00000136108.14	CKAP2	-1.10461	3.45993e-05	0.00127913
ENSG00000125845.6	BMP2	0.610416	0.00167934	0.036302
ENSG00000125319.14	HROB	-1.26242	9.7552e-08	5.48765e-06
ENSG00000100027.14	YPEL1	-1.02786	0.000200529	0.00604063
ENSG00000283149.1	NA	1.49257	0.000459237	0.0124677
ENSG00000144354.13	CDCA7	-2.56278	2.31217e-53	6.26854e-51
ENSG00000113368.11	LMNB1	-3.21384	2.86009e-107	2.42734e-104
ENSG00000031691.6	CENPQ	-0.775426	0.00110656	0.0258682
ENSG00000134690.10	CDCA8	-3.9882	1.13241e-108	1.10523e-105
ENSG00000115363.13	EVA1A	-0.320946	0.00157738	0.0344798
ENSG00000196550.10	FAM72A	-1.16978	0.00247565	0.0499739
ENSG00000167900.11	TK1	-3.45418	6.20055e-37	1.26078e-34
ENSG00000169607.12	CKAP2L	-2.60298	1.04554e-105	8.50372e-103
ENSG00000092853.13	CLSPN	-4.07765	8.41412e-89	4.83069e-86
ENSG00000176244.6	ACBD7	-2.50445	4.27672e-09	2.82989e-07
ENSG00000134539.16	KLRD1	1.56237	0.00107979	0.0253336
ENSG00000100335.14	MIEF1	0.778196	9.82105e-17	1.08924e-14
ENSG00000105202.8	FBL	-0.537604	0.000457748	0.0124446
ENSG00000004799.7	PDK4	0.965405	0.000384509	0.0106614
ENSG00000100749.7	VRK1	-0.867814	3.30773e-07	1.76037e-05
ENSG00000271936.1	NA	-1.19896	0.00152559	0.0334601
ENSG00000259529.1	NA	-0.437521	0.00213369	0.0441671
ENSG00000259781.1	HMGB1P6	-0.58501	1.14183e-07	6.38642e-06
ENSG00000163637.12	PRICKLE2	0.335427	0.000641835	0.0164139
ENSG00000164754.14	RAD21	-0.449849	1.54084e-05	0.00060396
ENSG00000139269.2	INHBE	-0.894891	8.80219e-06	0.000362487
ENSG00000158373.8	H2BC5	0.923607	4.71437e-10	3.40832e-08
ENSG00000185022.11	MAFF	-1.59787	0.00233936	0.0479163
ENSG00000241484.9	ARHGAP8	1.23328	0.00122892	0.0281225
ENSG00000055163.19	CYFIP2	0.88561	1.75273e-19	2.19316e-17
ENSG00000266904.5	LINC00663	1.08299	0.00047075	0.0127272
ENSG00000142453.11	CARM1	-0.322518	0.000363399	0.0101477
ENSG00000148090.11	AUH	0.513784	0.000171996	0.00525409
ENSG00000137825.10	ITPKA	-0.775482	0.000305222	0.00876466
ENSG00000260912.1	NA	0.862066	3.01145e-05	0.00113045
ENSG00000121774.17	KHDRBS1	-0.320175	0.000749415	0.0185407
ENSG00000100350.14	FOXRED2	-0.987672	5.37101e-10	3.84037e-08
ENSG00000136010.13	ALDH1L2	-0.859693	1.75895e-07	9.67173e-06
ENSG00000242732.4	RTL5	0.304715	0.00141145	0.0314875
ENSG00000161513.11	FDXR	0.742742	3.87177e-11	2.99908e-09
ENSG00000143321.18	HDGF	-0.372841	0.000240177	0.00713585
ENSG00000182149.20	IST1	0.889281	2.91141e-06	0.00013499
ENSG00000091409.14	ITGA6	-0.346839	0.000554692	0.0146121
ENSG00000099804.8	CDC34	-0.603309	0.000636841	0.0163353
ENSG00000130270.16	ATP8B3	-0.630625	9.98172e-06	0.000407622
ENSG00000117152.13	RGS4	-0.891075	5.31565e-09	3.49366e-07
ENSG00000237649.7	KIFC1	-4.25156	1.53622e-94	9.37096e-92
ENSG00000218891.4	ZNF579	0.828176	0.00121554	0.027849
ENSG00000111348.8	ARHGDIB	-0.876559	2.95411e-05	0.00111107
ENSG00000231607.10	DLEU2	-1.45024	0.000674053	0.0170089
ENSG00000158859.9	ADAMTS4	-1.70165	1.40344e-31	2.56029e-29
ENSG00000165480.15	SKA3	-4.19478	6.63523e-70	2.75574e-67
ENSG00000184056.14	VPS33B	0.834417	0.000526743	0.0139891
ENSG00000143228.12	NUF2	-4.0657	6.73989e-78	3.3734e-75
ENSG00000108798.8	ABI3	-0.980596	8.52973e-06	0.000354256
ENSG00000224259.6	LINC01133	-0.513055	1.80464e-06	8.69791e-05
ENSG00000138182.14	KIF20B	-1.97628	6.61121e-33	1.22906e-30
ENSG00000213967.10	ZNF726	-1.36387	0.00107831	0.0253291
ENSG00000178921.13	PFAS	-0.52001	4.83266e-09	3.18694e-07
ENSG00000136527.17	TRA2B	-0.389081	2.78341e-05	0.00105704
ENSG00000120539.14	MASTL	-0.729019	2.45404e-06	0.000115151
ENSG00000184319.15	RPL23AP82	0.377644	6.4698e-05	0.00225117
ENSG00000115657.13	ABCB6	0.429678	0.000563871	0.014814
ENSG00000163071.10	SPATA18	0.799052	8.53831e-12	6.97355e-10
ENSG00000067955.13	CBFB	-0.409327	0.000523272	0.0139349
ENSG00000125944.19	HNRNPR	-0.359587	0.00113369	0.0264391
ENSG00000233966.1	UBE2SP1	-1.25497	2.64372e-05	0.00101187
ENSG00000213846.5	NA	-0.366574	0.00158547	0.034618
ENSG00000169679.14	BUB1	-4.05932	1.90842e-142	4.65656e-139
ENSG00000137959.15	IFI44L	-0.622728	0.000879424	0.021193
ENSG00000242221.8	PSG2	0.463311	0.000895734	0.0215009
ENSG00000123416.15	TUBA1B	-1.06433	1.62629e-16	1.75387e-14
ENSG00000213551.4	DNAJC9	-0.694676	8.27091e-09	5.29338e-07
ENSG00000144395.17	CCDC150	-1.41922	2.08954e-08	1.2667e-06
ENSG00000130513.6	GDF15	0.729178	1.08293e-13	1.03116e-11
ENSG00000177595.17	PIDD1	0.590614	0.000155629	0.00478405
ENSG00000071051.13	NCK2	0.863563	0.00221058	0.0454695
ENSG00000248429.5	FAM198B-AS1	0.876992	9.24771e-10	6.5168e-08
ENSG00000184992.10	BRI3BP	-0.496709	0.0021504	0.0444189
ENSG00000125885.13	MCM8	-0.754491	3.94783e-11	3.04591e-09
ENSG00000152253.8	SPC25	-5.81091	5.58573e-10	3.97932e-08
ENSG00000116285.12	ERRFI1	-0.752045	6.06744e-07	3.10857e-05
ENSG00000164087.7	POC1A	-1.78723	3.86823e-23	5.43221e-21
ENSG00000075702.17	WDR62	-4.15249	1.07797e-65	4.20839e-63
ENSG00000121440.14	PDZRN3	0.432759	0.00128996	0.0292791
ENSG00000138092.10	CENPO	-0.956543	2.76138e-05	0.00105278
ENSG00000115008.5	IL1A	0.57463	2.2319e-07	1.2035e-05
ENSG00000177098.8	SCN4B	0.589609	0.00167293	0.0362437
ENSG00000125965.8	GDF5	0.615293	1.82614e-08	1.12449e-06
ENSG00000169258.6	GPRIN1	-1.04587	2.89789e-06	0.00013499
ENSG00000106689.10	LHX2	-5.0037	0.00139608	0.0312518
ENSG00000214357.8	NEURL1B	-3.3772	7.62205e-09	4.89416e-07
ENSG00000168952.15	STXBP6	-0.438202	0.0011907	0.027441
ENSG00000197903.7	H2BC12	0.689236	4.83119e-06	0.000214817
ENSG00000112984.11	KIF20A	-4.71489	1.35635e-133	2.64759e-130
ENSG00000261373.1	VPS9D1-AS1	-0.560581	0.00139936	0.0312567
ENSG00000065328.16	MCM10	-4.42118	7.01179e-71	3.04156e-68
ENSG00000135452.9	TSPAN31	0.37562	0.000268557	0.00782422
ENSG00000060656.19	PTPRU	0.42099	0.000151539	0.00466567
ENSG00000100908.13	EMC9	-0.550988	0.000242154	0.00717473
ENSG00000115875.18	SRSF7	-0.469952	6.70711e-06	0.000287743
ENSG00000167325.14	RRM1	-0.58299	5.59252e-06	0.000245317
ENSG00000136830.11	NIBAN2	-0.453306	0.00114046	0.0265336
ENSG00000166833.20	NAV2	-0.981514	3.561e-07	1.87867e-05
ENSG00000092470.11	WDR76	-2.32036	6.49116e-26	9.67232e-24
ENSG00000183688.4	RFLNB	-0.2987	0.000524521	0.0139491
ENSG00000125148.6	MT2A	-0.605317	0.00106494	0.025093
ENSG00000180008.8	SOCS4	0.368622	0.000763961	0.0188766
ENSG00000172167.7	MTBP	-1.352	5.66903e-06	0.000248115
ENSG00000183207.13	RUVBL2	-0.602048	6.22327e-06	0.000268757
ENSG00000173535.14	TNFRSF10C	0.988503	6.36719e-22	8.63108e-20
ENSG00000140525.17	FANCI	-1.52489	3.21109e-18	3.68708e-16
ENSG00000221963.5	APOL6	-0.455626	7.09917e-07	3.60874e-05
ENSG00000115828.16	QPCT	0.473172	0.000322178	0.00919433
ENSG00000237512.6	UNC5B-AS1	0.990894	0.000811905	0.01991
ENSG00000119333.11	DYNC2I2	-0.664804	2.7601e-06	0.000128893
ENSG00000282988.2	NA	3.15922	0.00242368	0.0491898
ENSG00000151466.11	SCLT1	-0.51995	0.000680205	0.0170883
ENSG00000054654.16	SYNE2	-2.91944	1.94794e-62	6.91343e-60
ENSG00000123080.10	CDKN2C	-0.804267	1.29805e-07	7.2188e-06
ENSG00000147853.16	AK3	0.377054	0.000198645	0.00599312
ENSG00000136982.5	DSCC1	-0.928525	5.62522e-05	0.00198561
ENSG00000163535.17	SGO2	-1.86702	1.06495e-24	1.53983e-22
ENSG00000248592.7	STIMATE-MUSTN1	-3.28683	2.06666e-12	1.73885e-10
ENSG00000105856.13	HBP1	0.349623	0.00192236	0.0404115
ENSG00000198331.10	HYLS1	-0.986433	3.6047e-08	2.1258e-06
ENSG00000121621.6	KIF18A	-1.19283	2.48807e-08	1.49898e-06
ENSG00000178031.16	ADAMTSL1	-0.350024	0.00124665	0.0284615
ENSG00000186185.13	KIF18B	-5.09076	6.54494e-140	1.41953e-136
ENSG00000079462.7	PAFAH1B3	-0.82618	1.42249e-09	9.91676e-08
ENSG00000144339.11	TMEFF2	-0.69987	0.00161947	0.035242
ENSG00000174442.11	ZWILCH	-0.686522	6.60678e-05	0.00228256
ENSG00000134954.14	ETS1	-0.339739	0.000388673	0.0107616
ENSG00000111581.9	NUP107	-0.365689	0.00238447	0.0486871
ENSG00000167550.10	RHEBL1	-3.41824	1.69948e-05	0.000662153
ENSG00000196460.13	RFX8	-0.630358	3.20295e-05	0.00118862
ENSG00000164070.11	HSPA4L	0.963293	8.01119e-11	6.08476e-09
ENSG00000164236.11	ANKRD33B	0.321855	0.000845449	0.0205008
ENSG00000134574.11	DDB2	0.460083	1.9551e-05	0.00075872
ENSG00000186446.11	ZNF501	-1.41761	0.000165276	0.00507262
ENSG00000177363.4	LRRN4CL	0.478558	3.85687e-05	0.00141324
ENSG00000176771.16	NCKAP5	0.392337	0.000635476	0.0163217
ENSG00000116771.5	AGMAT	-0.512854	0.00202081	0.0421859
ENSG00000119403.14	PHF19	-1.01294	1.80544e-09	1.25417e-07
ENSG00000176046.8	NUPR1	-0.487784	0.000820617	0.0199981
ENSG00000121542.11	SEC22A	0.821988	5.5385e-05	0.00196567
ENSG00000160447.6	PKN3	-0.974928	2.32012e-08	1.40213e-06
ENSG00000172244.8	C5orf34	-0.756242	0.000304666	0.00876466
ENSG00000163870.15	TPRA1	-0.495	1.37482e-06	6.72592e-05
ENSG00000135778.11	NTPCR	0.327902	0.000615895	0.0159658
ENSG00000166986.14	MARS1	-0.471522	6.59557e-05	0.00228256
ENSG00000126215.13	XRCC3	-1.8455	2.92513e-18	3.39872e-16
ENSG00000149294.16	NCAM1	-0.874025	6.73894e-06	0.000288474
ENSG00000182752.9	PAPPA	1.1122	6.43893e-19	7.61745e-17
ENSG00000073111.13	MCM2	-1.84817	1.68429e-28	2.7628e-26
ENSG00000187951.11	LOC100288637	-1.85678	1.23781e-12	1.09828e-10
ENSG00000185361.8	TNFAIP8L1	-0.668862	3.04719e-07	1.63197e-05
ENSG00000126860.11	EVI2A	-2.90688	0.00107725	0.0253291
ENSG00000095002.14	MSH2	-0.526089	0.00180827	0.0384882
ENSG00000049541.10	RFC2	-0.653299	1.37888e-05	0.000548184
ENSG00000118939.17	UCHL3	0.533175	0.000512107	0.0136749
ENSG00000177426.20	TGIF1	-0.412245	0.000678129	0.0170581
ENSG00000147576.16	ADHFE1	0.497668	0.000709527	0.0176883
ENSG00000123700.4	KCNJ2	0.739851	2.68283e-09	1.83108e-07
ENSG00000145861.7	C1QTNF2	-1.37341	8.69163e-09	5.52641e-07
ENSG00000130517.13	PGPEP1	0.32046	7.13375e-05	0.00243446
ENSG00000120699.12	EXOSC8	-0.533668	1.40412e-05	0.000557083
ENSG00000213420.7	GPC2	-0.882049	0.00185134	0.0392806
ENSG00000170734.11	POLH	0.27561	0.00126908	0.028906
ENSG00000198805.11	PNP	-0.741217	3.47843e-05	0.00128354
ENSG00000090447.11	TFAP4	-0.660759	2.29196e-05	0.000882426
ENSG00000226650.5	KIF4B	-3.37559	0.000146976	0.00454671
ENSG00000101945.16	SUV39H1	-0.792157	0.00114592	0.0266291
ENSG00000088305.18	DNMT3B	-0.654123	0.000572036	0.0150082
ENSG00000183763.8	TRAIP	-2.03515	1.16804e-27	1.88431e-25
ENSG00000160298.17	C21orf58	-1.16579	2.08802e-08	1.2667e-06
ENSG00000156509.13	FBXO43	-4.66412	1.7225e-12	1.48776e-10
ENSG00000132967.9	HMGB1P5	-0.70625	1.04393e-10	7.86778e-09
ENSG00000196230.12	TUBB	-0.542064	0.000221201	0.00662245
ENSG00000121211.7	MND1	-3.41898	4.96967e-15	5.02632e-13
ENSG00000162607.12	USP1	-0.495274	0.00116911	0.0270713
ENSG00000140534.13	TICRR	-2.5089	4.07654e-38	8.64935e-36
ENSG00000123146.19	ADGRE5	-0.458756	0.000121463	0.00386779
ENSG00000110025.12	SNX15	-0.510878	0.00152282	0.033437
ENSG00000187837.3	H1-2	0.972659	8.01832e-13	7.21279e-11
ENSG00000126453.9	BCL2L12	-0.726358	8.95086e-07	4.44582e-05
ENSG00000129355.6	CDKN2D	-0.710533	7.42745e-05	0.00251272
ENSG00000079156.16	OSBPL6	-0.686849	9.4581e-08	5.35137e-06
ENSG00000029993.14	HMGB3	-0.912845	1.86243e-12	1.58754e-10
ENSG00000104147.8	OIP5	-3.35828	8.10442e-27	1.25554e-24
ENSG00000256663.1	NA	-2.1942	1.66419e-26	2.51822e-24
ENSG00000257065.1	NA	-3.32036	0.000186516	0.0056534
ENSG00000091651.8	ORC6	-1.88029	1.47319e-13	1.38254e-11
ENSG00000285396.1	NA	-5.85665	2.37206e-09	1.62465e-07
ENSG00000231924.9	PSG1	0.425086	4.60609e-07	2.39762e-05
ENSG00000138376.10	BARD1	-1.34994	2.45679e-17	2.75612e-15
ENSG00000163935.13	SFMBT1	-0.44611	0.000352256	0.00990785
ENSG00000135069.13	PSAT1	-1.251	6.7843e-20	8.65553e-18
ENSG00000213300.5	HNRNPA3P6	-0.499564	0.00148234	0.0327322
ENSG00000138798.11	EGF	-0.860452	0.00138351	0.0310416
ENSG00000117877.10	POLR1G	-1.04808	2.7701e-05	0.00105404
ENSG00000111788.10	NA	-1.14889	6.65648e-08	3.81039e-06
ENSG00000140988.15	RPS2	-0.319096	0.0024661	0.0498843
ENSG00000183814.15	LIN9	-1.14907	1.47606e-08	9.17602e-07
ENSG00000115758.12	ODC1	-0.433788	0.000396018	0.0109339
ENSG00000116701.14	NCF2	-1.43684	0.000204849	0.00615177
ENSG00000284681.2	NA	-9.86143	1.40899e-07	7.79134e-06
ENSG00000124702.17	KLHDC3	-0.493904	0.000100295	0.00326295
ENSG00000066923.17	STAG3	-1.92833	8.52001e-05	0.00281882
ENSG00000112773.15	TENT5A	0.428336	0.00024348	0.0072011
ENSG00000100162.14	CENPM	-3.40586	4.24998e-27	6.69029e-25
ENSG00000128165.8	ADM2	-0.918367	1.24442e-05	0.000499612
ENSG00000076382.16	SPAG5	-3.808	2.09721e-75	9.98476e-73
ENSG00000079616.12	KIF22	-1.41468	1.82694e-20	2.36171e-18
ENSG00000154065.16	ANKRD29	0.290348	0.00174687	0.0375126
ENSG00000080546.13	SESN1	0.752559	3.86552e-07	2.03382e-05
ENSG00000105011.8	ASF1B	-3.91098	4.31471e-59	1.38071e-56
ENSG00000186871.6	ERCC6L	-4.95879	5.6651e-60	1.94005e-57
ENSG00000112029.9	FBXO5	-1.36896	8.04892e-23	1.11429e-20
ENSG00000147536.11	GINS4	-1.11011	5.52114e-06	0.00024383
ENSG00000151012.13	SLC7A11	-0.485107	5.67025e-05	0.00199071
ENSG00000169908.11	TM4SF1	-1.08035	7.53904e-06	0.000318532
ENSG00000126500.3	FLRT1	-1.23403	2.35498e-06	0.000110769
ENSG00000105486.13	LIG1	-0.801844	3.05481e-09	2.0562e-07
ENSG00000179750.15	APOBEC3B	-4.21218	1.82025e-62	6.57987e-60
ENSG00000171444.17	MCC	0.480747	2.08601e-06	0.000100046
ENSG00000104738.17	MCM4	-0.842099	1.14632e-08	7.19494e-07
ENSG00000163808.16	KIF15	-2.917	6.38026e-31	1.14259e-28
ENSG00000130695.15	CEP85	-0.741657	2.93387e-09	1.98163e-07
ENSG00000023892.10	DEF6	-0.634387	9.49086e-05	0.00309802
ENSG00000274276.4	CBSL	-0.706136	4.62678e-06	0.000206198
ENSG00000233117.2	LINC00702	-2.26884	6.34093e-05	0.00221027
ENSG00000103257.8	SLC7A5	-0.65784	4.92217e-05	0.00175972
ENSG00000150551.10	LYPD1	0.404106	0.00137342	0.0309217
ENSG00000122705.16	CLTA	0.619945	0.00037157	0.0103467
ENSG00000198901.13	PRC1	-2.87464	6.90254e-56	2.07289e-53
ENSG00000173918.14	C1QTNF1	0.461572	0.00239438	0.0488182
ENSG00000120802.13	TMPO	-1.61549	1.75898e-28	2.86128e-26
ENSG00000153879.8	CEBPG	-0.535067	1.54949e-07	8.54406e-06
ENSG00000168405.17	CMAHP	-0.620074	7.16357e-06	0.000304064
ENSG00000082397.17	EPB41L3	0.335133	0.00040109	0.0110427
ENSG00000099725.14	PRKY	0.521859	0.000907683	0.0217398
ENSG00000147889.17	CDKN2A	-0.453786	0.000202593	0.00609341
ENSG00000142230.11	SAE1	-0.333941	0.00139543	0.0312518
ENSG00000159335.15	PTMS	-0.387673	0.000671469	0.0169781
ENSG00000145012.13	LPP	0.540942	0.000297088	0.00856596
ENSG00000129810.14	SGO1	-4.97276	1.51632e-06	7.38121e-05
ENSG00000128422.16	KRT17	1.23855	2.83607e-22	3.87134e-20
ENSG00000163507.13	CIP2A	-1.60953	1.45639e-16	1.58819e-14
ENSG00000172748.13	ZNF596	0.777136	0.00247274	0.0499668
ENSG00000089685.14	BIRC5	-3.10549	5.82246e-27	9.09236e-25
ENSG00000173530.5	TNFRSF10D	0.543275	5.213e-10	3.74109e-08
ENSG00000076003.4	MCM6	-0.674605	1.97461e-07	1.07366e-05
ENSG00000118197.13	DDX59	0.387303	0.00181005	0.0384882
ENSG00000139174.11	PRICKLE1	-0.530578	0.00113615	0.0264649
ENSG00000060982.14	BCAT1	-0.703261	7.41795e-12	6.08396e-10
ENSG00000106804.7	C5	-0.697149	1.3365e-05	0.000533507
ENSG00000175592.8	FOSL1	-0.647254	0.000894798	0.0215009
ENSG00000283251.1	NA	-6.58155	7.65594e-06	0.000322773
ENSG00000162039.15	MEIOB	-6.44532	1.67541e-05	0.00065408
ENSG00000112118.18	MCM3	-1.11078	1.50891e-13	1.40928e-11
ENSG00000167657.13	DAPK3	-0.388083	2.16904e-05	0.000840072
ENSG00000196547.14	MAN2A2	-0.325245	0.00143259	0.0318683
ENSG00000143401.14	ANP32E	-0.612281	3.82116e-06	0.000173463
ENSG00000273398.6	NA	-3.25578	0.000656908	0.0166964
ENSG00000166845.14	C18orf54	-0.79181	0.000837503	0.0203587
ENSG00000104635.13	SLC39A14	0.507253	0.00175123	0.0375649
ENSG00000183963.18	SMTN	-0.752074	1.34828e-07	7.47684e-06
ENSG00000000460.16	C1orf112	-0.954148	3.69376e-08	2.17175e-06
ENSG00000231205.11	ZNF826P	-0.892067	0.0007088	0.0176883
ENSG00000263513.5	FAM72C	-3.21873	1.81425e-05	0.000705462
ENSG00000168003.16	SLC3A2	-0.528559	8.74146e-06	0.000360747
ENSG00000100297.15	MCM5	-1.90145	1.48896e-27	2.38233e-25
ENSG00000167196.13	FBXO22	0.415763	3.85889e-05	0.00141324
ENSG00000175938.6	ORAI3	0.351653	0.000195521	0.00590802
ENSG00000260456.6	C16orf95	-1.29642	3.44176e-07	1.82563e-05
ENSG00000236675.1	MTX1P1	-0.610555	0.00155099	0.0339409
ENSG00000085840.12	ORC1	-3.23372	4.0276e-69	1.60446e-66
ENSG00000128342.4	LIF	0.50024	3.96055e-05	0.00144504
ENSG00000186767.6	SPIN4	-0.628658	8.98051e-06	0.000369052
ENSG00000111665.11	CDCA3	-3.36301	1.92648e-69	7.83437e-67
ENSG00000108106.13	UBE2S	-1.23519	1.02908e-16	1.1349e-14
ENSG00000196081.9	ZNF724	-1.49917	0.000712944	0.0177509
ENSG00000149090.11	PAMR1	0.403276	0.000166825	0.00511213
ENSG00000162654.8	GBP4	-0.734581	0.00120208	0.0276706
ENSG00000003402.19	CFLAR	0.253255	0.00218503	0.0450389
ENSG00000100206.9	DMC1	-3.20916	3.20956e-10	2.34647e-08
ENSG00000122966.15	CIT	-1.09123	1.97262e-07	1.07366e-05
ENSG00000168411.13	RFWD3	-0.476969	0.000109263	0.00351948
ENSG00000100101.15	NA	-3.41617	0.000791146	0.0194744
ENSG00000137463.4	MGARP	0.345602	0.000239361	0.00712244
ENSG00000074621.13	SLC24A1	0.486752	0.00134994	0.0304926
ENSG00000112312.9	GMNN	-1.6542	3.59632e-12	2.97458e-10
ENSG00000101412.12	E2F1	-2.68037	1.64781e-29	2.74917e-27
ENSG00000086598.10	TMED2	0.458993	7.79892e-07	3.93372e-05
ENSG00000128245.14	YWHAH	-0.440698	0.000638046	0.0163447
ENSG00000170961.6	HAS2	-1.84328	9.05757e-21	1.1866e-18
ENSG00000101868.10	POLA1	-0.681967	5.70016e-07	2.93581e-05
ENSG00000196562.14	SULF2	0.870202	6.36666e-11	4.86169e-09
ENSG00000168872.16	DDX19A	0.45893	4.27244e-06	0.00019172
ENSG00000100714.15	MTHFD1	-0.456262	5.28376e-05	0.00188301
ENSG00000204387.13	SNHG32	0.463253	0.00051784	0.0138091
ENSG00000166803.12	PCLAF	-3.60504	2.924e-57	8.91821e-55
ENSG00000135486.17	HNRNPA1	-0.366225	1.42706e-05	0.00056389
ENSG00000175197.12	DDIT3	-0.486504	0.0017107	0.0368168
ENSG00000054148.17	PHPT1	0.411874	2.92642e-05	0.00110491
ENSG00000148082.9	SHC3	0.419372	0.00242925	0.0491898
ENSG00000135540.11	NHSL1	-0.615542	8.3664e-06	0.000348213
ENSG00000178999.12	AURKB	-3.61534	3.61408e-35	6.8492e-33
ENSG00000128739.22	SNRPN	0.414867	0.000121852	0.00387133
ENSG00000187627.15	RGPD1	-4.68891	0.000502953	0.0134673
ENSG00000119899.12	SLC17A5	0.317212	0.000873561	0.0210778
ENSG00000159388.5	BTG2	0.857848	9.17229e-15	9.22903e-13
ENSG00000171241.8	SHCBP1	-4.30271	7.17871e-99	5.00459e-96
ENSG00000185480.11	PARPBP	-1.45864	4.20375e-08	2.44218e-06
ENSG00000172890.12	NADSYN1	0.35772	0.00196616	0.0412238
ENSG00000162062.14	TEDC2	-1.15163	1.62265e-06	7.85958e-05
ENSG00000198554.11	WDHD1	-1.11834	2.55515e-13	2.34162e-11
ENSG00000135919.12	SERPINE2	0.710449	2.22808e-09	1.53141e-07
ENSG00000225511.7	NA	0.916486	0.000149465	0.0046091
ENSG00000171488.14	LRRC8C	-0.627535	6.77074e-06	0.000289201
ENSG00000154473.17	BUB3	-0.611683	4.57392e-10	3.33145e-08
ENSG00000173207.12	CKS1B	-1.16255	5.97746e-19	7.11464e-17
ENSG00000181588.16	MEX3D	-0.590073	2.94337e-05	0.00110916
ENSG00000186638.16	KIF24	-2.4486	6.78583e-25	9.88504e-23
ENSG00000204291.10	COL15A1	-0.596301	1.15733e-08	7.24076e-07
ENSG00000143799.12	PARP1	-0.374153	0.00102782	0.0243188
ENSG00000136244.11	IL6	0.409152	0.000442985	0.0120601
ENSG00000134057.14	CCNB1	-2.74787	2.37435e-59	7.99092e-57
ENSG00000185112.5	FAM43A	0.445567	0.000541885	0.0143328
ENSG00000105281.12	SLC1A5	-0.496617	6.26446e-05	0.00218752
ENSG00000141753.6	IGFBP4	0.352655	0.00197197	0.0412622
ENSG00000168209.4	DDIT4	-0.829512	9.2436e-09	5.85828e-07
ENSG00000155269.11	GPR78	0.956819	8.28064e-07	4.13397e-05
ENSG00000108950.11	FAM20A	0.59718	7.16545e-06	0.000304064
ENSG00000113407.13	TARS1	-0.369542	6.91508e-05	0.00236811
ENSG00000120156.20	TEK	-0.725199	0.00065454	0.0166579
ENSG00000144136.10	SLC20A1	-0.355507	0.00187659	0.039773
ENSG00000099901.16	RANBP1	-0.473236	8.81731e-05	0.00289754
ENSG00000162929.13	KIAA1841	-0.694738	4.44319e-05	0.00160911
ENSG00000156970.12	BUB1B	-4.08594	9.82631e-131	1.47546e-127
ENSG00000156976.16	EIF4A2	0.315221	0.00192327	0.0404115
ENSG00000204406.13	MBD5	0.673675	5.14029e-08	2.9686e-06
ENSG00000136003.15	ISCU	0.473853	7.60851e-10	5.40066e-08
ENSG00000164039.14	BDH2	0.346125	3.12474e-05	0.00116625
ENSG00000130052.13	STARD8	-0.444216	1.11562e-05	0.000451801
ENSG00000128944.13	KNSTRN	-1.04198	2.53398e-14	2.46086e-12
ENSG00000123473.15	STIL	-1.30672	6.90633e-13	6.24128e-11
ENSG00000163923.9	RPL39L	-0.77654	1.26279e-11	1.01858e-09
ENSG00000072736.18	NFATC3	0.498271	0.000502759	0.0134673
ENSG00000120647.9	CCDC77	-0.66933	5.87362e-06	0.000255352
ENSG00000138675.16	FGF5	-0.636892	2.13489e-09	1.47255e-07
ENSG00000214391.3	TUBAP2	-1.27081	1.52657e-06	7.41261e-05
ENSG00000165490.12	DDIAS	-3.35705	0.000288249	0.00832342
ENSG00000170037.13	CNTROB	-0.519425	0.000168143	0.00514443
ENSG00000105968.18	H2AZ2	-0.571845	5.50391e-09	3.59319e-07
ENSG00000146410.11	MTFR2	-2.17558	3.27316e-08	1.95988e-06
ENSG00000176907.4	TCIM	0.321602	0.000228717	0.00681613
ENSG00000188229.5	TUBB4B	-0.760937	7.37879e-09	4.76934e-07
ENSG00000138180.15	CEP55	-4.56172	1.95362e-121	2.11859e-118
ENSG00000177076.5	ACER2	0.92567	4.31371e-08	2.49862e-06
ENSG00000120334.15	CENPL	-0.510316	2.70547e-05	0.00103348
ENSG00000213782.7	DDX47	0.518381	2.27479e-05	0.000877548
