# Supplementary material for: Epigenetic Modulation of Radiation-Induced Diacylglycerol Kinase Alpha Expression Prevents Pro-Fibrotic Fibroblast Response
Source: Cancers (Basel). 2021 May 18;13(10):2455. doi: 10.3390/cancers13102455 (PMC8158145; doi:10.3390/cancers13102455)
Supplement: Supplementary file 1 [file cancers-13-02455-s001.zip › Table S9. List of differentially expressed genes from effect of IR in sgE1.xlsx]

## Sheet: Sheet1
Table S9. The list DEGs from effect of IR in sgE1
ENSEMBL_id	symbol	log2FoldChange	pvalue	padj
ENSG00000167578.17	RAB4B	0.339293	0.00121779	0.0140968
ENSG00000078237.6	TIGAR	0.501591	1.50673e-05	0.000324751
ENSG00000064601.18	CTSA	0.223048	8.73759e-05	0.00149404
ENSG00000213988.10	ZNF90	-1.48219	0.000200803	0.00307153
ENSG00000164283.12	ESM1	-1.10819	4.36517e-12	2.22648e-10
ENSG00000130204.12	TOMM40	-0.340246	0.00162783	0.0176665
ENSG00000153015.15	CWC27	-0.290776	0.000544836	0.00721917
ENSG00000260549.1	MT1L	-0.465219	0.000105576	0.00174541
ENSG00000172667.10	ZMAT3	0.428243	4.68415e-08	1.55739e-06
ENSG00000121644.18	DESI2	-0.283538	0.00247612	0.0245208
ENSG00000169992.9	NLGN2	0.286981	8.54906e-07	2.32297e-05
ENSG00000127564.16	PKMYT1	-3.80837	3.0053e-48	4.49643e-46
ENSG00000112511.17	PHF1	0.542066	6.18446e-06	0.000145145
ENSG00000143033.17	MTF2	-0.344627	0.00107567	0.0127056
ENSG00000109805.9	NCAPG	-4.74496	2.86342e-157	2.05639e-154
ENSG00000183696.13	UPP1	-0.319388	0.000105206	0.00174089
ENSG00000275591.4	XKR5	-4.29403	6.33255e-12	3.14074e-10
ENSG00000178075.19	GRAMD1C	-0.724404	4.68742e-06	0.000112479
ENSG00000152049.6	KCNE4	-0.384118	0.0012031	0.0139628
ENSG00000128973.12	CLN6	-0.679291	8.48649e-05	0.00145527
ENSG00000241429.1	EEF1A1P25	0.989284	7.01128e-05	0.00124388
ENSG00000153044.9	CENPH	-2.5685	1.25192e-17	8.74592e-16
ENSG00000180447.6	GAS1	0.369307	4.26415e-10	1.78458e-08
ENSG00000064102.14	INTS13	-0.379739	0.00125452	0.0143189
ENSG00000168811.6	IL12A	0.748591	3.34525e-05	0.000658559
ENSG00000117984.13	CTSD	0.294452	0.0003156	0.00452578
ENSG00000144959.9	NCEH1	-0.512919	2.73356e-07	8.08539e-06
ENSG00000183570.16	PCBP3	-0.542738	0.000509072	0.00681572
ENSG00000228502.1	EEF1A1P11	0.296546	0.00041204	0.00569935
ENSG00000135905.19	DOCK10	-0.438383	1.05404e-09	4.2622e-08
ENSG00000105088.8	OLFM2	0.36932	0.00366564	0.0332388
ENSG00000267041.5	ZNF850	-1.06505	0.000110539	0.00181775
ENSG00000149577.15	SIDT2	0.240889	0.000931917	0.0112595
ENSG00000231234.2	SKP1P1	-1.22268	0.00108348	0.0127811
ENSG00000214176.9	PLEKHM1P1	0.273443	0.00473631	0.0405898
ENSG00000092529.23	CAPN3	0.486227	0.000138801	0.00222901
ENSG00000117133.10	RPF1	-0.295214	0.00315103	0.0297286
ENSG00000085999.11	RAD54L	-4.96606	1.42947e-39	1.85977e-37
ENSG00000164104.11	HMGB2	-1.6751	3.03394e-20	2.38909e-18
ENSG00000177889.9	UBE2N	-0.347917	0.000999612	0.0119329
ENSG00000165029.15	ABCA1	0.255852	0.000951309	0.0114246
ENSG00000148677.6	ANKRD1	-0.580791	0.00386281	0.0346418
ENSG00000125746.16	EML2	0.259828	0.00218689	0.0221717
ENSG00000173546.7	CSPG4	-0.39971	5.82182e-05	0.00105576
ENSG00000015532.9	XYLT2	0.215385	0.00156735	0.0171273
ENSG00000165732.12	DDX21	-0.33112	9.80864e-06	0.00022013
ENSG00000152240.12	HAUS1	-0.396062	1.44877e-05	0.000315669
ENSG00000124795.15	DEK	-0.553853	8.82574e-09	3.24708e-07
ENSG00000138658.15	ZGRF1	-1.90861	6.37886e-19	4.75602e-17
ENSG00000205707.10	ETFRF1	0.417399	0.00330063	0.0308162
ENSG00000142856.16	ITGB3BP	-1.31057	7.50412e-13	4.0581e-11
ENSG00000153922.10	CHD1	-0.25676	0.00460023	0.0396698
ENSG00000161996.18	WDR90	-0.230499	0.00510184	0.042803
ENSG00000104870.12	FCGRT	0.320349	0.000160635	0.00252764
ENSG00000249115.8	HAUS5	-0.352223	0.00203582	0.0210452
ENSG00000121957.13	GPSM2	-1.02464	1.95521e-23	1.69584e-21
ENSG00000106615.9	RHEB	-0.3269	0.000756632	0.009513
ENSG00000111371.15	SLC38A1	-0.280581	0.000807627	0.0100626
ENSG00000270800.3	RPS10-NUDT3	1.42375	4.05314e-19	3.05757e-17
ENSG00000160949.16	TONSL	-1.39092	1.03538e-35	1.18403e-33
ENSG00000230615.6	NA	-0.696847	0.00380992	0.0342874
ENSG00000143437.20	ARNT	0.192313	0.00090613	0.0110072
ENSG00000004700.15	RECQL	-0.283964	0.00373355	0.0337353
ENSG00000113657.12	DPYSL3	-0.343555	1.71704e-07	5.28778e-06
ENSG00000025770.18	NCAPH2	-0.503147	2.13596e-05	0.000443341
ENSG00000276101.1	NA	1.30108	0.00535599	0.0444369
ENSG00000198833.6	UBE2J1	-0.172617	0.00276193	0.0267607
ENSG00000267365.1	KCNJ2-AS1	0.9106	1.07372e-05	0.000239468
ENSG00000260007.3	NA	-1.64494	0.000427643	0.00587112
ENSG00000177169.9	ULK1	0.214503	0.000451731	0.00615822
ENSG00000186480.12	INSIG1	0.730626	3.0384e-08	1.04505e-06
ENSG00000143382.14	ADAMTSL4	0.339123	6.41722e-06	0.000150215
ENSG00000153107.12	ANAPC1	-0.294178	0.000495281	0.00665589
ENSG00000204899.5	MZT1	-0.672138	3.76039e-08	1.26668e-06
ENSG00000157184.6	CPT2	0.343266	0.000100487	0.00167361
ENSG00000198517.9	MAFK	0.380133	0.00244986	0.0243068
ENSG00000138326.19	RPS24	-0.444647	0.00505654	0.0425622
ENSG00000120742.10	SERP1	0.220117	0.0057377	0.046981
ENSG00000137507.11	LRRC32	1.39381	1.02077e-05	0.000228801
ENSG00000223485.2	LINC01615	0.303104	0.00362261	0.0329403
ENSG00000004838.13	ZMYND10	-1.55747	3.10649e-08	1.06642e-06
ENSG00000138778.11	CENPE	-2.69212	1.32693e-73	3.01565e-71
ENSG00000117650.12	NEK2	-5.32841	3.45947e-174	2.82324e-171
ENSG00000103226.17	NOMO3	0.251952	0.00495843	0.0419527
ENSG00000109323.9	MANBA	0.295967	0.00234023	0.0234467
ENSG00000092621.12	PHGDH	-1.53016	8.37619e-34	9.16989e-32
ENSG00000173456.4	RNF26	-0.256667	0.000182614	0.00282886
ENSG00000168078.9	PBK	-4.70415	9.4868e-76	2.3017e-73
ENSG00000143369.14	ECM1	0.179372	0.000755084	0.00950685
ENSG00000167553.15	TUBA1C	-0.950245	2.22334e-17	1.52942e-15
ENSG00000169682.17	SPNS1	0.434411	0.000758239	0.00951988
ENSG00000172331.11	BPGM	0.232182	0.00143934	0.0159913
ENSG00000185345.20	PRKN	0.442846	0.00315806	0.0297746
ENSG00000266680.1	NA	0.754724	0.000949802	0.0114218
ENSG00000164938.13	TP53INP1	0.629813	6.95306e-12	3.4108e-10
ENSG00000099625.13	CBARP	0.400132	0.00333281	0.0310359
ENSG00000110811.19	P3H3	0.282658	2.80521e-06	7.00483e-05
ENSG00000163956.11	LRPAP1	0.414826	0.00115402	0.0134541
ENSG00000139618.14	BRCA2	-2.473	6.89406e-23	5.89409e-21
ENSG00000118513.18	MYB	-5.559	1.65319e-05	0.00035043
ENSG00000174871.10	CNIH2	-1.42065	7.32499e-05	0.00128808
ENSG00000163950.12	SLBP	-0.353158	2.34938e-05	0.000485393
ENSG00000139354.10	GAS2L3	-2.99307	2.03719e-106	8.12795e-104
ENSG00000106399.11	RPA3	-0.650571	9.7577e-07	2.6226e-05
ENSG00000172432.18	GTPBP2	-0.281839	2.94078e-05	0.000591252
ENSG00000091592.15	NLRP1	0.324227	9.02378e-05	0.00154005
ENSG00000033030.13	ZCCHC8	-0.343244	0.000159545	0.0025149
ENSG00000162733.17	DDR2	-0.18676	0.00334312	0.0310853
ENSG00000158402.19	CDC25C	-5.35103	4.5966e-57	8.09091e-55
ENSG00000105270.14	CLIP3	0.238575	0.000297487	0.00429693
ENSG00000074800.15	ENO1	-0.694731	6.09685e-08	1.98302e-06
ENSG00000122483.17	CCDC18	-1.86583	2.1355e-21	1.74276e-19
ENSG00000088280.18	ASAP3	0.270887	1.14774e-05	0.000254715
ENSG00000075643.5	MOCOS	-0.263968	0.00372928	0.0337138
ENSG00000123364.4	HOXC13	0.41991	0.00334557	0.0310903
ENSG00000058272.18	PPP1R12A	-0.26102	0.000189773	0.00291961
ENSG00000079387.13	SENP1	-0.323004	0.000749839	0.00944744
ENSG00000070950.9	RAD18	-0.365281	0.000115856	0.00188584
ENSG00000119669.4	IRF2BPL	0.244677	0.000144342	0.00230973
ENSG00000164934.13	DCAF13	-0.390834	7.4451e-05	0.00130536
ENSG00000185883.11	ATP6V0C	-0.698988	0.000601814	0.00785233
ENSG00000166881.9	NEMP1	-1.20861	1.81413e-28	1.81343e-26
ENSG00000163393.12	SLC22A15	-0.429969	0.00250594	0.0247207
ENSG00000181649.6	PHLDA2	0.3894	0.00438667	0.0383252
ENSG00000108468.14	CBX1	-0.384733	7.30527e-08	2.35052e-06
ENSG00000118246.13	FASTKD2	-0.411411	0.000691671	0.00881978
ENSG00000079435.9	LIPE	-0.659922	1.57579e-07	4.8863e-06
ENSG00000186625.13	KATNA1	-0.226057	0.00182508	0.0193091
ENSG00000158769.17	F11R	0.573281	0.000641999	0.00828644
ENSG00000119139.19	TJP2	-0.284563	0.000464141	0.00628446
ENSG00000132182.11	NUP210	-4.34033	3.4585e-07	1.00802e-05
ENSG00000126787.12	DLGAP5	-5.83247	1.99689e-75	4.78028e-73
ENSG00000089280.18	FUS	-0.587236	1.87242e-12	9.77248e-11
ENSG00000184678.10	H2BC21	0.490264	1.20922e-05	0.000267368
ENSG00000134684.10	YARS1	-0.508184	1.73347e-15	1.08065e-13
ENSG00000068903.19	SIRT2	0.233043	0.00264959	0.025995
ENSG00000123243.14	ITIH5	0.399812	2.25479e-09	8.89726e-08
ENSG00000134686.18	PHC2	-0.211808	0.00344854	0.031735
ENSG00000104856.13	RELB	0.504236	0.00317459	0.0298567
ENSG00000223318.1	RNA5SP111	0.54675	0.000461115	0.00625764
ENSG00000161800.12	RACGAP1	-2.06216	2.31986e-78	5.9501e-76
ENSG00000213221.4	DNLZ	0.48137	2.91867e-05	0.000587465
ENSG00000103187.7	COTL1	-0.268271	3.60486e-06	8.82969e-05
ENSG00000112742.9	TTK	-5.48165	2.75319e-47	4.05171e-45
ENSG00000163661.3	PTX3	-0.308084	5.4038e-05	0.000989998
ENSG00000122566.21	HNRNPA2B1	-0.311078	8.6786e-06	0.000198239
ENSG00000176428.5	VPS37D	0.515172	0.00124061	0.0142286
ENSG00000106105.13	GARS1	-0.499928	1.11491e-08	4.05205e-07
ENSG00000135679.23	MDM2	0.669668	8.10141e-18	5.70403e-16
ENSG00000126218.11	F10	0.272452	0.000517545	0.00690341
ENSG00000178719.16	GRINA	0.220644	0.00237294	0.0237048
ENSG00000171298.12	GAA	0.194835	0.00097048	0.0116315
ENSG00000083312.17	TNPO1	-0.244154	0.0027339	0.0265465
ENSG00000157873.17	TNFRSF14	0.383795	0.000152088	0.00240793
ENSG00000284946.1	NA	-3.96045	4.27517e-48	6.34351e-46
ENSG00000185684.14	EP400P1	-0.621223	7.76836e-05	0.00134887
ENSG00000071967.11	CYBRD1	-0.408638	0.000529732	0.00705027
ENSG00000278259.4	MYO19	-0.754694	1.48417e-10	6.49921e-09
ENSG00000249485.1	RBBP4P1	-0.559125	0.000949712	0.0114218
ENSG00000143924.18	EML4	-0.256855	0.000444678	0.00606667
ENSG00000133083.14	DCLK1	0.320257	0.00484	0.041301
ENSG00000164687.10	FABP5	-1.30854	8.75123e-09	3.22627e-07
ENSG00000153885.14	KCTD15	-0.580892	0.000349972	0.00495146
ENSG00000130702.15	LAMA5	0.281976	0.00342159	0.0315517
ENSG00000065802.11	ASB1	-0.323317	0.00125853	0.0143555
ENSG00000169116.11	PARM1	1.20798	1.45836e-08	5.25773e-07
ENSG00000072071.16	ADGRL1	0.340085	1.7177e-05	0.000361967
ENSG00000114107.8	CEP70	-0.545549	0.000234687	0.00349383
ENSG00000204642.13	HLA-F	0.685436	0.000261585	0.00383388
ENSG00000104946.12	TBC1D17	0.275982	2.05822e-05	0.000428196
ENSG00000075213.10	SEMA3A	-0.392083	0.00436454	0.038169
ENSG00000268193.5	NA	0.65547	0.00513634	0.042972
ENSG00000136811.16	ODF2	-0.407212	5.16671e-06	0.00012254
ENSG00000119326.14	CTNNAL1	-0.297209	0.00493127	0.041782
ENSG00000108179.13	PPIF	-0.442204	2.4782e-12	1.27489e-10
ENSG00000161960.14	EIF4A1	-0.344556	0.0015307	0.0168292
ENSG00000120149.8	MSX2	0.680186	6.85326e-07	1.89589e-05
ENSG00000196591.11	HDAC2	-0.274352	0.0016203	0.0175988
ENSG00000182568.16	SATB1	0.252099	8.19462e-05	0.00141332
ENSG00000188610.12	FAM72B	-2.11479	3.24342e-10	1.36696e-08
ENSG00000182004.12	SNRPE	-0.389005	0.00443299	0.0385423
ENSG00000004777.18	ARHGAP33	-1.1069	1.83326e-15	1.13891e-13
ENSG00000284057.1	NA	-2.68654	0.00446611	0.038725
ENSG00000171681.12	ATF7IP	-0.210046	0.00226064	0.0227301
ENSG00000255302.4	EID1	0.243457	0.000334712	0.00476182
ENSG00000139496.15	NUP58	-0.49987	2.70353e-07	8.00977e-06
ENSG00000101447.14	FAM83D	-3.57065	7.52758e-67	1.50167e-64
ENSG00000185100.10	ADSS1	0.486358	0.00308915	0.0292524
ENSG00000130826.17	DKC1	-0.273377	0.00440965	0.0384511
ENSG00000116584.17	ARHGEF2	-0.426722	5.46755e-05	0.000999638
ENSG00000175643.9	RMI2	-1.53039	1.9483e-23	1.69584e-21
ENSG00000241741.1	RPL7AP30	0.30887	0.00164336	0.0177847
ENSG00000198648.10	STK39	-0.276286	0.00136781	0.0153485
ENSG00000171262.11	FAM98B	-0.285009	0.00337349	0.0312826
ENSG00000254122.2	PCDHGB7	0.287156	0.00101956	0.0121226
ENSG00000144580.13	CNOT9	-0.453192	0.00495812	0.0419527
ENSG00000162643.12	DNAI3	1.15008	2.34507e-09	9.21299e-08
ENSG00000168118.11	RAB4A	0.201451	0.00596712	0.0485495
ENSG00000154839.9	SKA1	-6.18422	1.52136e-21	1.25296e-19
ENSG00000160161.9	CILP2	0.549326	0.00292613	0.0279955
ENSG00000237886.1	NALT1	0.864351	0.00156405	0.0171121
ENSG00000215030.5	RPL13P12	0.552003	2.38137e-07	7.12585e-06
ENSG00000121152.9	NCAPH	-4.84025	6.10319e-187	5.21793e-184
ENSG00000119906.12	SLF2	-0.311385	0.00550351	0.0454508
ENSG00000159147.17	DONSON	-0.776463	5.85387e-12	2.91945e-10
ENSG00000277287.1	NA	0.990742	1.09115e-09	4.39395e-08
ENSG00000196262.13	PPIA	-0.297407	4.77272e-05	0.000893528
ENSG00000197451.11	HNRNPAB	-0.321783	1.13968e-07	3.57723e-06
ENSG00000136492.8	BRIP1	-2.59909	1.27884e-61	2.39171e-59
ENSG00000058804.11	NDC1	-1.2137	3.29852e-32	3.5251e-30
ENSG00000146263.11	MMS22L	-1.12033	2.44637e-14	1.42604e-12
ENSG00000182636.6	NDN	0.373944	1.5948e-05	0.000340465
ENSG00000132359.14	RAP1GAP2	0.360863	0.00021633	0.0032666
ENSG00000215784.5	FAM72D	-3.49955	1.06583e-06	2.85611e-05
ENSG00000183684.7	ALYREF	-0.399895	2.43882e-06	6.19328e-05
ENSG00000024526.16	DEPDC1	-5.79953	1.09237e-69	2.30734e-67
ENSG00000131504.16	DIAPH1	-0.225885	0.00482346	0.0411794
ENSG00000105778.18	AVL9	0.524345	0.00126989	0.014461
ENSG00000259522.3	NA	-0.548765	0.00122835	0.0141746
ENSG00000176349.11	NA	-0.967704	0.000302558	0.00436665
ENSG00000126226.21	PCID2	-0.271453	0.00227386	0.0228455
ENSG00000004139.13	SARM1	0.315512	0.000103185	0.00171443
ENSG00000130821.15	SLC6A8	0.279915	0.000458629	0.00623333
ENSG00000244509.3	APOBEC3C	0.530618	7.52958e-20	5.82699e-18
ENSG00000171992.12	SYNPO	0.38067	0.00169696	0.0182438
ENSG00000117593.10	DARS2	-0.368387	0.000419543	0.00578087
ENSG00000268412.2	TRMT112P6	-10.3319	0.00221552	0.022374
ENSG00000051341.13	POLQ	-5.73921	6.36598e-37	7.42175e-35
ENSG00000112081.16	SRSF3	-0.331967	4.12664e-07	1.18165e-05
ENSG00000149636.15	DSN1	-0.895206	8.61714e-17	5.70893e-15
ENSG00000123009.4	NME2P1	0.676263	0.00248117	0.0245514
ENSG00000012048.21	BRCA1	-2.71754	4.18041e-39	5.24861e-37
ENSG00000127423.10	AUNIP	-2.19917	2.62525e-13	1.45474e-11
ENSG00000115163.14	CENPA	-4.15044	4.8182e-75	1.12345e-72
ENSG00000149554.12	CHEK1	-0.745561	6.7531e-06	0.000157257
ENSG00000213707.2	HMGB1P10	-0.84601	0.00249649	0.0246681
ENSG00000171824.13	EXOSC10	-0.213857	0.00113774	0.0133121
ENSG00000137880.5	GCHFR	0.516374	0.00501383	0.0423217
ENSG00000104823.8	ECH1	0.56445	5.63176e-08	1.84512e-06
ENSG00000181192.11	DHTKD1	-0.208927	0.00170783	0.0183387
ENSG00000010244.18	ZNF207	-0.24006	6.81253e-05	0.00121704
ENSG00000160445.10	ZER1	0.264869	0.000822888	0.0102243
ENSG00000030582.17	GRN	0.255353	2.53452e-05	0.000519461
ENSG00000105246.5	EBI3	0.742897	1.50396e-05	0.000324544
ENSG00000161681.15	SHANK1	0.484311	9.24193e-05	0.00156833
ENSG00000108064.10	TFAM	-0.360095	0.00414287	0.0366229
ENSG00000085491.16	SLC25A24	-0.282696	0.0027596	0.0267526
ENSG00000095564.13	BTAF1	-0.191003	0.00612617	0.0495586
ENSG00000132274.15	TRIM22	0.484855	6.65727e-08	2.1536e-06
ENSG00000172893.15	DHCR7	0.306331	0.00601821	0.0488547
ENSG00000071282.11	LMCD1	0.335641	0.000354039	0.00500111
ENSG00000054967.12	RELT	-0.371945	0.00278682	0.0269728
ENSG00000158987.20	RAPGEF6	-0.298933	0.00123299	0.0141905
ENSG00000143493.12	INTS7	-0.359523	7.71732e-05	0.00134261
ENSG00000143933.16	CALM2	-0.436489	0.000217526	0.00327914
ENSG00000189057.10	FAM111B	-5.52987	4.33855e-39	5.40933e-37
ENSG00000182612.10	TSPAN10	0.530752	0.00141204	0.0157464
ENSG00000065809.13	FAM107B	-0.876211	8.0489e-12	3.9269e-10
ENSG00000087586.17	AURKA	-2.51941	5.2055e-89	1.50741e-86
ENSG00000088836.13	SLC4A11	0.42004	0.00282145	0.0272639
ENSG00000219201.4	NA	-0.318218	0.00578741	0.0473597
ENSG00000167526.13	RPL13	0.215067	0.0012325	0.0141905
ENSG00000173894.10	CBX2	-1.21557	1.25417e-06	3.33098e-05
ENSG00000167522.15	ANKRD11	0.733292	3.87515e-07	1.11734e-05
ENSG00000074842.7	MYDGF	0.197086	0.00572502	0.0469347
ENSG00000214021.15	TTLL3	0.263086	0.00252737	0.0249184
ENSG00000106268.15	NUDT1	-0.59586	1.63243e-07	5.04451e-06
ENSG00000274012.1	RN7SL2	0.72872	9.5006e-07	2.56117e-05
ENSG00000178809.11	TRIM73	1.18706	0.00073015	0.0092448
ENSG00000123737.12	EXOSC9	-0.36226	4.53089e-05	0.0008527
ENSG00000235912.1	NA	0.654984	0.00211351	0.0216216
ENSG00000181035.13	SLC25A42	0.283285	0.000149472	0.00237488
ENSG00000225828.1	FAM229A	0.72489	1.48482e-05	0.000321186
ENSG00000114383.9	TUSC2	0.231917	0.00282782	0.0272961
ENSG00000166073.10	GPR176	-0.30638	0.00201268	0.0208997
ENSG00000150753.11	CCT5	-0.382393	6.27399e-09	2.35163e-07
ENSG00000221829.9	FANCG	-1.159	6.3841e-19	4.75602e-17
ENSG00000268858.2	LOC112268269	0.244067	0.00584252	0.0477454
ENSG00000162755.13	KLHDC9	0.661415	0.00062722	0.0081249
ENSG00000069248.11	NUP133	-0.22248	0.000653342	0.00840265
ENSG00000111445.13	RFC5	-0.812296	7.24765e-08	2.33616e-06
ENSG00000166123.13	GPT2	-0.479189	2.14214e-08	7.55601e-07
ENSG00000117724.12	CENPF	-4.64867	5.66605e-295	2.03457e-291
ENSG00000129467.13	ADCY4	0.360056	0.00197458	0.0206334
ENSG00000129465.15	RIPK3	0.326906	0.00187115	0.0197267
ENSG00000117143.13	UAP1	-0.601125	1.39872e-10	6.17018e-09
ENSG00000014138.8	POLA2	-0.96356	0.00289039	0.0277508
ENSG00000124762.13	CDKN1A	1.08696	1.60752e-64	3.10337e-62
ENSG00000162989.4	KCNJ3	0.373951	0.000337767	0.00479388
ENSG00000214944.9	ARHGEF28	-0.233595	0.00101673	0.0120969
ENSG00000280798.1	LINC00294	0.222816	0.00440834	0.0384511
ENSG00000145041.15	DCAF1	-0.217789	0.00217465	0.0220974
ENSG00000128951.13	DUT	-0.327007	0.00183289	0.0193803
ENSG00000149503.12	INCENP	-1.254	1.14115e-43	1.58823e-41
ENSG00000197380.10	DACT3	0.30509	0.00335319	0.031145
ENSG00000149798.4	CDC42EP2	0.267086	5.473e-06	0.000129292
ENSG00000134516.16	DOCK2	-0.285199	0.00122033	0.0141172
ENSG00000247572.7	CKMT2-AS1	0.313355	0.00444406	0.0386199
ENSG00000165072.9	MAMDC2	0.680643	1.71465e-11	8.18747e-10
ENSG00000183150.7	GPR19	-1.17737	0.00492727	0.041776
ENSG00000151503.12	NCAPD3	-0.866495	2.6569e-23	2.29337e-21
ENSG00000176723.9	ZNF843	0.621955	0.00507241	0.0426358
ENSG00000188191.14	PRKAR1B	0.254198	0.00214199	0.0218259
ENSG00000116017.10	ARID3A	0.397057	4.50297e-05	0.000849227
ENSG00000126603.8	GLIS2	0.208773	0.00519341	0.0433076
ENSG00000106683.14	LIMK1	0.760102	1.89324e-22	1.60336e-20
ENSG00000143320.8	CRABP2	0.305549	5.33012e-05	0.00098141
ENSG00000093009.9	CDC45	-3.67327	2.63759e-67	5.38128e-65
ENSG00000110427.15	KIAA1549L	-0.339667	0.000206323	0.00314192
ENSG00000106462.10	EZH2	-1.83901	3.45267e-25	3.21188e-23
ENSG00000088325.15	TPX2	-3.12785	1.7495e-283	3.92631e-280
ENSG00000137975.7	CLCA2	1.64237	1.22854e-21	1.01646e-19
ENSG00000138035.14	PNPT1	-0.431274	0.000763038	0.00957344
ENSG00000169592.14	INO80E	0.273246	0.0033433	0.0310853
ENSG00000228727.8	SAPCD1	-3.4392	4.86304e-05	0.000906657
ENSG00000166452.11	AKIP1	0.525827	0.00100783	0.012015
ENSG00000107281.9	NPDC1	0.290405	5.23575e-05	0.000967567
ENSG00000111696.11	NT5DC3	-0.713988	4.81093e-12	2.43998e-10
ENSG00000160886.13	LY6K	-0.594256	1.13396e-15	7.21955e-14
ENSG00000198692.9	EIF1AY	-0.277677	0.00392157	0.0350908
ENSG00000178105.10	DDX10	-0.296796	0.000222759	0.00333903
ENSG00000198089.15	SFI1	-0.330699	2.72074e-05	0.000550712
ENSG00000148175.12	STOM	0.367289	1.75178e-08	6.25276e-07
ENSG00000102384.13	CENPI	-2.58588	1.05182e-39	1.38766e-37
ENSG00000103995.13	CEP152	-1.43711	4.23565e-18	3.05409e-16
ENSG00000080839.11	RBL1	-1.51842	6.62984e-47	9.52257e-45
ENSG00000122176.11	FMOD	0.333741	0.000274766	0.00400744
ENSG00000162433.14	AK4	-0.382221	0.00389795	0.034922
ENSG00000279738.1	NA	0.777165	0.00372237	0.0336852
ENSG00000182199.10	SHMT2	-0.610173	2.03999e-08	7.23833e-07
ENSG00000176208.8	ATAD5	-2.59565	1.17828e-21	9.79391e-20
ENSG00000068796.16	KIF2A	-0.337378	0.000379308	0.00530794
ENSG00000095539.15	SEMA4G	0.545115	6.94045e-05	0.0012362
ENSG00000064199.6	SPA17	-0.732417	1.90443e-08	6.77071e-07
ENSG00000161281.10	COX7A1	0.327072	0.000343304	0.00486478
ENSG00000162849.15	KIF26B	0.345124	0.00131576	0.0148854
ENSG00000184661.13	CDCA2	-3.00646	3.89214e-104	1.42611e-101
ENSG00000134809.8	TIMM10	-0.442701	2.5983e-05	0.000528312
ENSG00000198830.10	HMGN2	-0.819735	3.29871e-13	1.81116e-11
ENSG00000095319.14	NUP188	-0.300404	0.000598623	0.00781649
ENSG00000197965.11	MPZL1	-1.25913	0.00211555	0.0216301
ENSG00000197093.10	GAL3ST4	0.741264	2.49758e-11	1.17386e-09
ENSG00000131351.14	HAUS8	-1.44196	7.25403e-16	4.66806e-14
ENSG00000176619.12	LMNB2	-0.911765	3.20493e-19	2.42791e-17
ENSG00000133739.15	LRRCC1	-0.601857	0.00116878	0.0135908
ENSG00000184831.13	APOO	-0.358543	0.0056743	0.046604
ENSG00000183137.14	CEP57L1	-0.550623	1.04132e-05	0.000232826
ENSG00000100522.9	GNPNAT1	-0.4915	4.4004e-05	0.000832506
ENSG00000147119.3	CHST7	0.451522	3.45996e-05	0.000678909
ENSG00000165886.4	UBTD1	0.321644	0.00030818	0.00443354
ENSG00000006007.11	GDE1	0.175363	0.0048555	0.0414137
ENSG00000128050.8	PAICS	-0.626128	2.01359e-16	1.31941e-14
ENSG00000213853.9	EMP2	-0.220311	0.000104044	0.00172485
ENSG00000167601.11	AXL	-0.320697	1.30162e-07	4.06423e-06
ENSG00000156876.9	SASS6	-0.719949	2.00794e-07	6.07934e-06
ENSG00000171793.14	CTPS1	-0.437384	5.62317e-05	0.00102288
ENSG00000128708.12	HAT1	-0.736552	7.11539e-09	2.65592e-07
ENSG00000132517.15	SLC52A1	1.46993	0.000541824	0.00718988
ENSG00000187741.14	FANCA	-3.59217	1.38465e-77	3.45278e-75
ENSG00000109107.13	ALDOC	0.261883	0.00312199	0.0295167
ENSG00000185298.12	CCDC137	-1.90134	3.68494e-51	5.75299e-49
ENSG00000076242.14	MLH1	-0.297435	0.00248195	0.0245514
ENSG00000132749.10	TESMIN	-0.970369	8.71398e-07	2.3633e-05
ENSG00000189223.14	PAX8-AS1	0.303933	0.0011046	0.0130131
ENSG00000232388.4	SMIM26	0.30939	0.00204355	0.021062
ENSG00000143653.9	SCCPDH	-0.285814	0.000114996	0.00187523
ENSG00000137692.11	DCUN1D5	-0.399238	0.000215146	0.00325146
ENSG00000096384.19	HSP90AB1	-0.176884	0.00136548	0.0153415
ENSG00000118482.11	PHF3	-0.477668	0.000243197	0.00360857
ENSG00000233426.3	EIF3FP3	0.274003	8.89403e-06	0.000202901
ENSG00000259426.5	LOC145694	-0.596634	0.003378	0.0312826
ENSG00000106799.12	TGFBR1	-0.551447	0.00265807	0.0260355
ENSG00000240979.1	NA	0.37226	0.000439771	0.00600429
ENSG00000175334.7	BANF1	-0.338149	4.48412e-05	0.000846561
ENSG00000134852.14	CLOCK	-0.311397	2.27948e-06	5.84728e-05
ENSG00000123213.22	NLN	-0.241191	0.00547476	0.045255
ENSG00000087245.12	MMP2	0.202721	0.00467746	0.0402199
ENSG00000159259.7	CHAF1B	-1.81962	4.18364e-52	6.76694e-50
ENSG00000101187.15	SLCO4A1	-1.10001	7.81166e-08	2.50001e-06
ENSG00000105223.19	PLD3	0.36493	3.59786e-08	1.2211e-06
ENSG00000154920.14	EME1	-3.38957	7.28774e-27	6.99701e-25
ENSG00000169184.5	MN1	0.468833	9.39046e-12	4.56901e-10
ENSG00000168439.16	STIP1	-0.284344	5.92782e-06	0.000139304
ENSG00000149131.15	SERPING1	0.810154	2.47471e-10	1.05788e-08
ENSG00000012171.19	SEMA3B	0.615795	7.26555e-14	4.1676e-12
ENSG00000135446.16	CDK4	-0.288709	0.000213953	0.00323616
ENSG00000080986.12	NDC80	-4.19533	2.96992e-98	9.87443e-96
ENSG00000270757.1	HSPE1-MOB4	-1.30365	0.0013186	0.0149069
ENSG00000240376.1	RPS8P8	0.493472	0.000154308	0.00243662
ENSG00000119630.13	PGF	0.956317	2.25872e-17	1.54783e-15
ENSG00000165272.15	AQP3	0.608529	0.000308867	0.00443632
ENSG00000102218.5	RP2	-0.256688	0.00124434	0.0142364
ENSG00000169057.21	MECP2	0.239845	0.00203299	0.0210377
ENSG00000152495.10	CAMK4	-1.25569	3.01238e-05	0.000604294
ENSG00000244332.1	NA	-3.44006	0.00479588	0.040983
ENSG00000132383.11	RPA1	-0.28478	8.33318e-05	0.00143034
ENSG00000109881.16	CCDC34	-0.999847	4.32966e-16	2.82672e-14
ENSG00000136518.16	ACTL6A	-0.648891	3.17305e-13	1.75289e-11
ENSG00000077312.8	SNRPA	-0.590586	1.88267e-07	5.77804e-06
ENSG00000197852.10	INKA2	1.09486	1.36715e-11	6.56306e-10
ENSG00000037757.13	MRI1	0.247608	0.00326611	0.0305256
ENSG00000096433.10	ITPR3	-0.216638	0.00285959	0.0275128
ENSG00000183762.12	KREMEN1	-0.307202	0.00182241	0.0192922
ENSG00000175221.14	MED16	0.249941	0.00280968	0.0271648
ENSG00000168496.3	FEN1	-1.74913	6.54072e-106	2.55287e-103
ENSG00000099904.15	ZDHHC8	0.207006	0.00125108	0.0142888
ENSG00000124006.14	OBSL1	0.341118	0.000238067	0.00354123
ENSG00000140264.19	SERF2	0.300986	7.57765e-05	0.00132472
ENSG00000072501.17	SMC1A	-0.339793	0.00479117	0.0409622
ENSG00000007968.6	E2F2	-5.85531	2.64591e-41	3.57178e-39
ENSG00000106080.10	FKBP14	0.243419	0.00285403	0.0275052
ENSG00000153207.15	AHCTF1	-0.262406	3.7126e-05	0.000719052
ENSG00000169994.18	MYO7B	-3.10385	0.000457701	0.00622542
ENSG00000181938.13	GINS3	-1.75756	1.03596e-28	1.04493e-26
ENSG00000138346.14	DNA2	-1.47924	4.08477e-10	1.71752e-08
ENSG00000221890.3	NPTXR	0.385717	0.00168813	0.0182034
ENSG00000029153.14	ARNTL2	-1.04849	9.11085e-06	0.000206797
ENSG00000234648.1	NA	0.634266	7.70925e-05	0.0013425
ENSG00000257167.2	TMPO-AS1	-4.17886	3.72704e-39	4.71234e-37
ENSG00000149136.8	SSRP1	-0.357966	1.65828e-06	4.33541e-05
ENSG00000005073.5	HOXA11	0.166201	0.00360086	0.0328338
ENSG00000156261.12	CCT8	-0.212354	0.000671197	0.00858921
ENSG00000100242.15	SUN2	-0.77521	2.90247e-06	7.2276e-05
ENSG00000109536.11	FRG1	-0.260317	0.00340294	0.0314444
ENSG00000142173.14	COL6A2	0.217352	0.00527039	0.043828
ENSG00000029534.20	ANK1	0.382545	1.59388e-06	4.1776e-05
ENSG00000136875.12	PRPF4	-0.263424	0.000303011	0.00436969
ENSG00000189241.6	TSPYL1	0.173305	0.0011141	0.0130993
ENSG00000196419.12	XRCC6	-0.15002	0.00400114	0.0355979
ENSG00000213293.4	RPL28P5	0.766894	0.000267006	0.00391013
ENSG00000168476.11	REEP4	-0.688382	9.68601e-05	0.0016283
ENSG00000143341.11	HMCN1	-1.27831	0.000149295	0.00237418
ENSG00000155158.20	TTC39B	-0.340608	0.00492824	0.041776
ENSG00000228065.10	LINC01515	-0.725665	0.00429604	0.0378094
ENSG00000198934.4	MAGEE1	0.344132	0.0017855	0.0189798
ENSG00000250644.3	NA	0.282623	0.00282592	0.0272924
ENSG00000111845.4	PAK1IP1	-0.383783	0.000814926	0.0101464
ENSG00000100221.10	JOSD1	-0.176742	0.00506331	0.0425792
ENSG00000141030.12	COPS3	-0.310941	0.000420437	0.00578431
ENSG00000161888.11	SPC24	-3.17068	1.6222e-97	5.29544e-95
ENSG00000184162.14	NR2C2AP	-0.643702	0.000233109	0.00347611
ENSG00000177084.16	POLE	-1.01044	3.20707e-18	2.32177e-16
ENSG00000220785.7	MTMR9LP	0.430899	0.00300983	0.0286373
ENSG00000119943.12	PYROXD2	0.280377	0.00018052	0.00280369
ENSG00000119397.16	CNTRL	-0.607098	4.65224e-06	0.000111966
ENSG00000168672.3	LRATD2	0.718212	9.21275e-06	0.000208588
ENSG00000006634.7	DBF4	-0.872546	1.13659e-05	0.000252553
ENSG00000135521.8	LTV1	-0.267795	0.00204145	0.0210524
ENSG00000152784.15	PRDM8	-0.481138	0.000292763	0.00423892
ENSG00000268942.2	CKS1BP3	-1.21734	0.006134	0.0495586
ENSG00000170629.14	DPY19L2P2	-1.74621	0.000109063	0.00179644
ENSG00000072840.12	EVC	0.367857	3.40108e-08	1.1565e-06
ENSG00000168685.14	IL7R	-0.427072	9.52843e-05	0.00160632
ENSG00000136404.15	TM6SF1	-1.62085	0.000207953	0.00316405
ENSG00000142920.16	AZIN2	0.33152	0.00585775	0.047848
ENSG00000101974.14	ATP11C	-0.366353	0.00038383	0.00535869
ENSG00000100307.12	CBX7	0.271668	5.10203e-05	0.000945323
ENSG00000172716.16	SLFN11	-0.925829	0.000191227	0.00293946
ENSG00000166851.14	PLK1	-4.0006	9.36456e-221	1.29332e-217
ENSG00000272196.2	H2AC19	0.597322	9.52353e-05	0.00160632
ENSG00000269893.6	SNHG8	0.189207	0.00510863	0.04282
ENSG00000143641.9	GALNT2	0.216174	0.00104209	0.0123414
ENSG00000177602.5	HASPIN	-1.95169	1.00712e-24	9.17863e-23
ENSG00000123933.16	MXD4	0.335175	3.55852e-07	1.03214e-05
ENSG00000146376.10	ARHGAP18	-0.262999	0.000670016	0.00858921
ENSG00000189159.15	JPT1	-0.361877	0.000267514	0.00391119
ENSG00000270231.3	NBPF8	-0.289434	9.65732e-05	0.001625
ENSG00000096060.14	FKBP5	-1.57291	4.39331e-16	2.85788e-14
ENSG00000157353.16	FCSK	0.454368	4.8628e-05	0.000906657
ENSG00000137135.17	ARHGEF39	-2.52401	2.55469e-29	2.59135e-27
ENSG00000118007.12	STAG1	-0.192015	0.00305032	0.0289458
ENSG00000105519.15	CAPS	0.413246	0.0049994	0.0422198
ENSG00000174307.6	PHLDA3	0.680592	2.19446e-05	0.000454434
ENSG00000104368.17	PLAT	-0.35596	2.14152e-08	7.55601e-07
ENSG00000257923.10	CUX1	0.375588	0.00215074	0.0219027
ENSG00000139734.18	DIAPH3	-1.70392	2.78607e-39	3.57294e-37
ENSG00000140332.15	TLE3	-0.565883	0.000817097	0.0101607
ENSG00000123240.16	OPTN	0.205865	0.00217479	0.0220974
ENSG00000223953.5	C1QTNF5	-0.690573	1.12413e-07	3.54083e-06
ENSG00000236255.1	NA	0.417793	0.00361025	0.0328861
ENSG00000148672.8	GLUD1	-0.21885	0.000890629	0.010863
ENSG00000068878.14	PSME4	-0.276913	0.000724064	0.00918068
ENSG00000196152.10	ZNF79	0.341373	0.00396709	0.0354177
ENSG00000131080.14	EDA2R	0.487231	7.04517e-06	0.000163423
ENSG00000141076.17	UTP4	-0.355411	7.57705e-05	0.00132472
ENSG00000081181.7	ARG2	-0.600953	0.000560561	0.00737852
ENSG00000132780.16	NASP	-0.723878	2.44577e-19	1.86857e-17
ENSG00000091127.13	PUS7	-0.357612	0.00181023	0.0191973
ENSG00000196517.11	SLC6A9	-0.59602	0.000714181	0.00906818
ENSG00000152137.6	HSPB8	0.346858	0.00142771	0.0158916
ENSG00000204227.4	RING1	0.564365	0.000220638	0.00331492
ENSG00000167740.9	CYB5D2	0.290696	0.000907663	0.0110184
ENSG00000075218.18	GTSE1	-4.69187	7.84512e-140	4.85694e-137
ENSG00000100479.12	POLE2	-2.964	4.48975e-36	5.16724e-34
ENSG00000123975.4	CKS2	-1.74852	5.6997e-27	5.50174e-25
ENSG00000213186.7	TRIM59	-0.48059	0.00364256	0.0330629
ENSG00000099624.7	ATP5F1D	0.243275	0.00267234	0.0261182
ENSG00000197299.11	BLM	-4.63705	9.01013e-40	1.19828e-37
ENSG00000150977.10	RILPL2	0.231329	0.00190084	0.0199928
ENSG00000163939.18	PBRM1	-0.230422	0.000261095	0.00382982
ENSG00000214756.7	CSKMT	-0.537018	0.00142156	0.0158427
ENSG00000108055.9	SMC3	-0.518482	1.72662e-08	6.17525e-07
ENSG00000109674.3	NEIL3	-2.82543	4.66731e-19	3.50614e-17
ENSG00000204272.12	NBDY	0.466316	0.0010407	0.0123332
ENSG00000141699.10	RETREG3	0.432453	0.00084109	0.0103929
ENSG00000087088.19	BAX	0.302553	4.83725e-05	0.000904667
ENSG00000204160.11	ZDHHC18	-0.59834	0.00314219	0.0296784
ENSG00000087086.14	FTL	0.197445	0.000343955	0.00487017
ENSG00000141040.14	ZNF287	0.419086	0.000911146	0.0110457
ENSG00000102409.9	BEX4	0.354398	1.31017e-05	0.000287916
ENSG00000011028.13	MRC2	0.227789	0.000805023	0.010044
ENSG00000164032.11	H2AZ1	-1.2496	6.09174e-79	1.6084e-76
ENSG00000129968.15	ABHD17A	0.361089	0.000427728	0.00587112
ENSG00000164125.15	GASK1B	0.654136	8.09951e-11	3.67219e-09
ENSG00000125871.13	MGME1	-0.494309	0.000905329	0.0110049
ENSG00000117691.9	NENF	0.198498	0.00361866	0.0329293
ENSG00000167670.15	CHAF1A	-1.04727	1.74571e-21	1.43117e-19
ENSG00000188549.12	CCDC9B	0.26627	0.00402437	0.0357691
ENSG00000198668.10	CALM1	-0.285036	0.000565193	0.00743404
ENSG00000133119.12	RFC3	-1.93016	2.88553e-39	3.67424e-37
ENSG00000274272.1	NA	0.312356	0.00441892	0.0384945
ENSG00000171456.18	ASXL1	-0.350094	0.00114884	0.0134111
ENSG00000136938.8	ANP32B	-0.33442	1.6762e-08	6.00689e-07
ENSG00000147862.16	NFIB	-0.511398	0.000121714	0.0019776
ENSG00000103152.11	MPG	0.171041	0.00359765	0.0328291
ENSG00000259091.1	LINC00517	-1.36246	2.28059e-08	7.99722e-07
ENSG00000204946.9	ZNF783	0.304354	0.000435572	0.00595602
ENSG00000090861.15	AARS1	-0.396593	2.07985e-09	8.24318e-08
ENSG00000271551.2	LOC115308161	-3.36158	0.00434034	0.0380327
ENSG00000013375.15	PGM3	-0.451724	0.00225064	0.0226757
ENSG00000226137.5	BAIAP2-DT	0.300286	4.39834e-05	0.000832506
ENSG00000084774.13	CAD	-0.302977	0.00128812	0.0146372
ENSG00000280239.1	NA	-1.73479	8.47186e-06	0.00019386
ENSG00000122952.16	ZWINT	-2.65156	4.07276e-89	1.19873e-86
ENSG00000260032.1	NORAD	0.359897	3.30753e-07	9.67157e-06
ENSG00000228716.6	DHFR	-1.21609	6.16135e-25	5.67286e-23
ENSG00000244694.7	PTCHD4	0.524521	1.42212e-10	6.25801e-09
ENSG00000243130.7	PSG11	0.764228	0.00363265	0.0329897
ENSG00000189403.14	HMGB1	-0.524324	8.71966e-16	5.59117e-14
ENSG00000162063.12	CCNF	-2.23006	2.88086e-78	7.28493e-76
ENSG00000136114.16	THSD1	0.381111	0.00219945	0.0222539
ENSG00000228594.3	FNDC10	-0.322378	0.00510032	0.042803
ENSG00000090581.9	GNPTG	0.290396	2.47477e-06	6.26686e-05
ENSG00000035499.12	DEPDC1B	-5.3362	1.86321e-26	1.77936e-24
ENSG00000069329.17	VPS35	-0.294433	0.00391783	0.0350826
ENSG00000168488.18	ATXN2L	-0.207908	0.00131932	0.0149069
ENSG00000260280.5	SLX1B-SULT1A4	0.447366	0.00616031	0.0496865
ENSG00000142694.6	EVA1B	0.312893	0.00040145	0.00557435
ENSG00000244560.7	LOC155060	0.406828	0.00176576	0.0188257
ENSG00000233608.3	TWIST2	0.350946	1.93683e-07	5.89387e-06
ENSG00000102007.10	PLP2	-0.577967	1.30159e-18	9.53828e-17
ENSG00000162545.5	CAMK2N1	0.175458	0.00423228	0.0373031
ENSG00000020922.12	MRE11	-0.292746	0.00213619	0.0217792
ENSG00000180530.10	NRIP1	-0.336415	5.88373e-05	0.00106381
ENSG00000134222.16	PSRC1	-1.33204	4.295e-24	3.85562e-22
ENSG00000161544.9	CYGB	1.4581	2.89855e-27	2.813e-25
ENSG00000095951.16	HIVEP1	-0.614555	0.00492721	0.041776
ENSG00000167992.12	VWCE	1.34535	1.18561e-35	1.34725e-33
ENSG00000217239.3	RPL34P16	1.0536	0.00346836	0.0318693
ENSG00000107731.12	UNC5B	0.242253	0.00573852	0.046981
ENSG00000148339.12	SLC25A25	-0.464951	0.00556655	0.045908
ENSG00000085231.13	AK6	-0.682677	0.000108565	0.00178988
ENSG00000127220.5	ABHD8	0.340157	0.00121736	0.0140968
ENSG00000118777.11	ABCG2	-0.780592	0.00176905	0.0188384
ENSG00000196584.2	XRCC2	-2.58501	5.51809e-24	4.88038e-22
ENSG00000141458.12	NPC1	-0.249692	0.00440859	0.0384511
ENSG00000137563.11	GGH	-0.936627	7.59871e-13	4.09691e-11
ENSG00000123999.4	INHA	0.695113	0.00462914	0.0398808
ENSG00000159593.14	NAE1	-0.342635	0.00287898	0.027656
ENSG00000178996.13	SNX18	0.182609	0.000677671	0.00865355
ENSG00000214940.8	NPIPA8	1.47617	0.00443069	0.038541
ENSG00000171533.11	MAP6	0.214597	0.00337311	0.0312826
ENSG00000167747.14	C19orf48	-0.701339	1.19523e-06	3.18384e-05
ENSG00000104889.6	RNASEH2A	-2.00472	6.34751e-31	6.66451e-29
ENSG00000138442.9	WDR12	-0.211221	0.00361719	0.0329293
ENSG00000084693.15	AGBL5	0.238671	0.000732452	0.00926741
ENSG00000171872.4	KLF17	-2.25611	3.32435e-08	1.13255e-06
ENSG00000235162.8	C12orf75	-0.390239	2.00954e-05	0.000418714
ENSG00000283239.1	KBTBD11-OT1	1.53933	5.83564e-05	0.00105618
ENSG00000173531.15	MST1	0.418699	0.00512748	0.0429342
ENSG00000132821.11	VSTM2L	0.723515	0.00399059	0.0355569
ENSG00000135829.16	DHX9	-0.221638	2.56061e-05	0.000522423
ENSG00000139410.14	SDSL	0.347262	0.00481509	0.0411275
ENSG00000127663.14	KDM4B	0.368064	4.60643e-06	0.000111161
ENSG00000111247.14	RAD51AP1	-3.19935	1.55709e-53	2.61272e-51
ENSG00000121310.16	ECHDC2	0.371959	1.81174e-06	4.71421e-05
ENSG00000265666.1	RARA-AS1	0.555489	0.000103483	0.00171713
ENSG00000155189.11	AGPAT5	-0.780477	0.00398708	0.0355432
ENSG00000149557.13	FEZ1	0.252636	0.000218028	0.00328395
ENSG00000135372.8	NAT10	-0.176456	0.00489131	0.0416202
ENSG00000042088.13	TDP1	-0.408615	2.39835e-07	7.15282e-06
ENSG00000112078.13	KCTD20	-0.590189	0.00290837	0.0278787
ENSG00000100629.16	CEP128	-1.80208	5.4022e-20	4.19875e-18
ENSG00000077152.10	UBE2T	-2.08029	1.80015e-60	3.26464e-58
ENSG00000011332.19	DPF1	-1.15968	0.00268926	0.0262038
ENSG00000180900.18	SCRIB	0.277837	0.00109784	0.012942
ENSG00000111358.13	GTF2H3	-0.256312	0.00114017	0.0133272
ENSG00000101460.12	MAP1LC3A	0.385019	4.87976e-06	0.000116504
ENSG00000172831.11	CES2	0.361979	0.000125562	0.0020346
ENSG00000270607.1	NA	-0.643185	0.000115369	0.00187962
ENSG00000120868.13	APAF1	-0.454832	4.16928e-05	0.000794641
ENSG00000280670.2	CCDC163	-1.15956	0.00158984	0.0173309
ENSG00000163918.10	RFC4	-1.39197	1.47669e-29	1.515e-27
ENSG00000140848.16	CPNE2	-0.430946	3.64567e-09	1.40762e-07
ENSG00000175602.3	CCDC85B	0.590455	3.12129e-08	1.06946e-06
ENSG00000151692.14	RNF144A	-1.84676	0.000375227	0.0052595
ENSG00000273294.1	C1QTNF3-AMACR	-7.04136	0.000855463	0.0105415
ENSG00000145375.7	SPATA5	-0.566357	2.28303e-06	5.84728e-05
ENSG00000179163.11	FUCA1	0.536895	9.84006e-12	4.77482e-10
ENSG00000146918.19	NCAPG2	-1.85223	9.9284e-108	4.05124e-105
ENSG00000123219.12	CENPK	-2.59481	2.40051e-32	2.59631e-30
ENSG00000167904.14	TMEM68	0.475919	1.26432e-05	0.000278523
ENSG00000110400.10	NECTIN1	-0.27048	0.00469525	0.0403149
ENSG00000177700.5	POLR2L	0.289897	0.00087322	0.0106943
ENSG00000163520.13	FBLN2	0.313458	1.10314e-06	2.9429e-05
ENSG00000261061.1	NA	-1.64838	3.50162e-14	2.03456e-12
ENSG00000258727.1	LOC102724814	0.423255	7.48426e-05	0.00131095
ENSG00000139687.15	RB1	-0.345032	0.00268385	0.026188
ENSG00000168807.16	SNTB2	-0.187065	0.00477014	0.0408408
ENSG00000136002.18	ARHGEF4	0.230633	0.00510464	0.0428065
ENSG00000177666.16	PNPLA2	0.308345	7.6416e-07	2.10103e-05
ENSG00000115825.9	PRKD3	-0.305832	0.00110831	0.0130482
ENSG00000172262.11	ZNF131	0.418674	0.000269194	0.00392935
ENSG00000178074.5	C2orf69	-0.325795	0.00159349	0.0173496
ENSG00000170242.17	USP47	-0.277241	0.000870688	0.0106851
ENSG00000010292.12	NCAPD2	-0.957904	1.47988e-27	1.44401e-25
ENSG00000138750.14	NUP54	-0.456476	4.30731e-07	1.22557e-05
ENSG00000154736.5	ADAMTS5	0.426636	5.24502e-08	1.72471e-06
ENSG00000246273.7	SBF2-AS1	0.3549	0.00122845	0.0141746
ENSG00000118971.7	CCND2	0.283172	0.000461872	0.00626318
ENSG00000151849.14	CENPJ	-0.799161	2.67841e-08	9.28342e-07
ENSG00000168936.10	TMEM129	0.265738	0.000609422	0.00793442
ENSG00000139178.10	C1RL	0.251389	5.37041e-05	0.000985893
ENSG00000144810.15	COL8A1	0.584569	0.00147767	0.0163564
ENSG00000093217.10	XYLB	-0.381551	0.00420244	0.0370582
ENSG00000185475.10	TMEM179B	0.262898	0.0012305	0.01418
ENSG00000279822.1	NA	-1.25071	0.00531157	0.0440887
ENSG00000231298.6	MANCR	-5.31493	0.00051555	0.00688193
ENSG00000230291.5	RPL26P32	0.714328	3.67275e-05	0.000712871
ENSG00000112715.21	VEGFA	-0.377026	2.44591e-05	0.000504178
ENSG00000160200.17	CBS	-0.546679	9.61293e-15	5.75302e-13
ENSG00000166889.13	PATL1	-0.20479	0.00103259	0.0122614
ENSG00000124212.5	PTGIS	0.234727	8.78827e-05	0.00150128
ENSG00000115902.10	SLC1A4	-0.774044	5.39364e-07	1.51779e-05
ENSG00000142303.13	ADAMTS10	0.30555	0.00197248	0.0206334
ENSG00000142102.15	PGGHG	0.496756	0.000506709	0.00678914
ENSG00000214194.8	SMIM30	0.489586	0.00362538	0.0329403
ENSG00000245694.9	CRNDE	-0.84003	6.40823e-07	1.78101e-05
ENSG00000086200.16	IPO11	-0.316935	0.000651983	0.00839119
ENSG00000168077.13	SCARA3	-1.1232	4.44404e-18	3.17882e-16
ENSG00000170581.13	STAT2	0.277668	0.00510145	0.042803
ENSG00000088448.14	ANKRD10	0.241187	0.00131381	0.0148727
ENSG00000173762.7	CD7	0.709665	0.001793	0.019037
ENSG00000138190.16	EXOC6	-0.369729	0.00489882	0.0416446
ENSG00000172346.14	CSDC2	0.352239	0.0002386	0.00354621
ENSG00000066279.17	ASPM	-2.69039	1.26981e-58	2.27982e-56
ENSG00000243725.6	TTC4	-0.313363	0.000316367	0.00453317
ENSG00000010030.13	ETV7	0.648828	2.28097e-06	5.84728e-05
ENSG00000198056.13	PRIM1	-2.57415	9.47922e-23	8.06588e-21
ENSG00000162073.13	PAQR4	-1.9617	7.64186e-09	2.83475e-07
ENSG00000101596.15	SMCHD1	-0.326527	9.96877e-05	0.00166492
ENSG00000188747.8	NOXA1	0.644007	0.000452479	0.00616374
ENSG00000135842.16	NIBAN1	-0.852805	5.79074e-12	2.89602e-10
ENSG00000163002.12	NUP35	-0.608616	7.13204e-09	2.65661e-07
ENSG00000117399.13	CDC20	-4.97419	3.06978e-151	2.04129e-148
ENSG00000120278.16	PLEKHG1	0.599205	0.00318859	0.0299727
ENSG00000221995.5	TIAF1	1.4709	0.000189011	0.00291288
ENSG00000119771.14	KLHL29	0.249154	0.00240979	0.023983
ENSG00000147642.16	SYBU	-0.506071	0.00212352	0.0216993
ENSG00000179954.15	SSC5D	0.291641	0.000148987	0.00237348
ENSG00000155287.10	SLC25A28	0.45651	0.00032454	0.00462811
ENSG00000226608.3	FTLP3	0.600129	1.26829e-05	0.000279055
ENSG00000241923.2	RPL14P3	0.714193	0.00191134	0.0200915
ENSG00000171703.16	TCEA2	0.243348	0.00393067	0.0351276
ENSG00000167487.11	KLHL26	-2.04032	0.000626891	0.0081249
ENSG00000166508.17	MCM7	-1.75638	5.43883e-95	1.71314e-92
ENSG00000101407.12	TTI1	-0.40238	5.34053e-05	0.00098141
ENSG00000138834.12	MAPK8IP3	0.26929	0.001383	0.0154787
ENSG00000113621.14	TXNDC15	0.283532	0.00272571	0.0264813
ENSG00000090889.11	KIF4A	-4.91233	3.56367e-87	9.99721e-85
ENSG00000011426.10	ANLN	-4.36221	2.14683e-271	4.28269e-268
ENSG00000203995.9	ZYG11A	-1.29975	6.6942e-05	0.00119828
ENSG00000169299.13	PGM2	-0.398206	2.62308e-08	9.10923e-07
ENSG00000182871.14	COL18A1	0.320426	8.29043e-05	0.0014271
ENSG00000013810.18	TACC3	-2.67251	7.49991e-127	3.84724e-124
ENSG00000143772.9	ITPKB	0.332398	0.000112765	0.00184388
ENSG00000274600.1	RIMBP3B	5.64262	0.00032019	0.00457334
ENSG00000105327.17	BBC3	0.992051	1.06539e-27	1.04524e-25
ENSG00000253250.2	C8orf88	-0.606929	0.00152817	0.0168118
ENSG00000205978.5	NYNRIN	0.426192	3.80789e-09	1.46083e-07
ENSG00000152475.6	ZNF837	0.655556	0.0004735	0.00638709
ENSG00000171045.14	TSNARE1	0.387326	0.0002228	0.00333903
ENSG00000138381.9	ASNSD1	0.558125	0.00122941	0.0141766
ENSG00000117395.12	EBNA1BP2	-0.222607	0.00365657	0.0331734
ENSG00000141971.12	MVB12A	0.28223	0.00280272	0.0271121
ENSG00000136231.13	IGF2BP3	-0.354519	5.33586e-05	0.00098141
ENSG00000050438.16	SLC4A8	-0.881726	2.2989e-10	9.92176e-09
ENSG00000180155.19	LYNX1	0.934964	3.83707e-45	5.42447e-43
ENSG00000068489.12	PRR11	-2.98966	1.48122e-76	3.643e-74
ENSG00000164484.11	TMEM200A	-0.240194	0.000791796	0.00988589
ENSG00000116830.11	TTF2	-0.5426	0.000161232	0.00253481
ENSG00000136450.12	SRSF1	-0.332888	2.45356e-08	8.55362e-07
ENSG00000008282.8	SYPL1	-0.395097	0.000553734	0.00732087
ENSG00000118816.9	CCNI	-0.247575	0.00563525	0.0463681
ENSG00000110628.14	SLC22A18	0.387587	0.0048846	0.0416202
ENSG00000065357.19	DGKA	0.452439	1.8254e-08	6.50262e-07
ENSG00000276612.3	NA	11.1352	0.000974585	0.0116729
ENSG00000164951.15	PDP1	-0.229023	0.00521705	0.0434649
ENSG00000197472.14	ZNF695	-4.02975	4.90633e-06	0.000116983
ENSG00000101452.14	DHX35	-0.388373	0.00200487	0.020879
ENSG00000091483.6	FH	-0.375554	9.23588e-06	0.000208605
ENSG00000062822.13	POLD1	-1.1663	1.0547e-23	9.28241e-22
ENSG00000229814.1	RPL35AP21	1.86533	9.9848e-05	0.00166605
ENSG00000103342.12	GSPT1	-0.263989	2.19221e-05	0.000454434
ENSG00000140694.16	PARN	-0.224112	0.00362457	0.0329403
ENSG00000086827.8	ZW10	-0.42941	2.09696e-05	0.00043575
ENSG00000164985.14	PSIP1	-0.305952	2.74997e-06	6.87647e-05
ENSG00000139514.12	SLC7A1	-0.513783	1.52178e-17	1.05085e-15
ENSG00000163346.16	PBXIP1	0.321949	4.19534e-07	1.19941e-05
ENSG00000165661.16	QSOX2	-0.220849	0.00265595	0.0260289
ENSG00000131067.16	GGT7	0.286997	2.93182e-06	7.28048e-05
ENSG00000102098.17	SCML2	-1.00529	1.35608e-09	5.41045e-08
ENSG00000189212.12	DPY19L2P1	-5.42494	0.00100591	0.012
ENSG00000189058.8	APOD	0.778713	4.59911e-08	1.53196e-06
ENSG00000125835.18	SNRPB	-0.313775	1.44564e-05	0.000315371
ENSG00000203812.2	H2AC18	0.690299	6.68445e-05	0.00119802
ENSG00000162032.15	SPSB3	0.442531	1.55098e-05	0.000332295
ENSG00000253368.3	TRNP1	0.239539	0.000436581	0.00596528
ENSG00000184371.13	CSF1	0.203973	0.00301886	0.0286927
ENSG00000107566.13	ERLIN1	-0.44611	5.20608e-12	2.62556e-10
ENSG00000141499.16	WRAP53	-0.671657	2.95185e-06	7.32011e-05
ENSG00000198728.10	LDB1	0.253054	0.000703834	0.00895581
ENSG00000082126.17	MPP4	-0.794354	6.08754e-05	0.00109845
ENSG00000075539.14	FRYL	-0.217124	0.00111025	0.0130625
ENSG00000167552.13	TUBA1A	-0.469682	0.00207411	0.0213279
ENSG00000164897.12	TMUB1	0.297327	0.00204809	0.0210967
ENSG00000244405.7	ETV5	-0.434899	1.02578e-06	2.75291e-05
ENSG00000164134.12	NAA15	-0.352156	0.00175431	0.018737
ENSG00000165071.14	TMEM71	-4.35866	7.38364e-10	3.02662e-08
ENSG00000213347.10	MXD3	-1.67287	1.35303e-15	8.49382e-14
ENSG00000138166.5	DUSP5	-0.24676	0.00142427	0.0158631
ENSG00000154146.12	NRGN	-8.58277	2.28215e-13	1.27577e-11
ENSG00000164237.8	CMBL	0.489295	6.31972e-08	2.05179e-06
ENSG00000061337.15	LZTS1	-0.790336	3.15184e-06	7.77309e-05
ENSG00000163029.15	SMC6	-0.404707	4.12361e-05	0.000789289
ENSG00000185347.17	TEDC1	-1.55747	1.02409e-14	6.10849e-13
ENSG00000166897.14	ELFN2	0.520086	5.38717e-17	3.58227e-15
ENSG00000169045.17	HNRNPH1	-0.326891	0.00573259	0.0469753
ENSG00000137962.12	ARHGAP29	-0.33521	0.00149944	0.0165463
ENSG00000143376.13	SNX27	0.790541	0.000625194	0.00811036
ENSG00000112297.14	CRYBG1	-0.635121	1.19942e-05	0.000265858
ENSG00000129226.13	CD68	0.361915	0.00249395	0.0246566
ENSG00000110200.8	ANAPC15	-0.253886	0.00239305	0.0238678
ENSG00000148773.13	MKI67	-5.21955	1.57226e-294	4.70473e-291
ENSG00000117632.22	STMN1	-1.25018	4.21533e-26	4.00434e-24
ENSG00000110092.3	CCND1	0.1962	0.000420102	0.00578414
ENSG00000178234.12	GALNT11	0.292683	2.50649e-05	0.000514307
ENSG00000164050.12	PLXNB1	0.558941	1.31724e-13	7.46046e-12
ENSG00000128578.9	STRIP2	-1.48483	1.57268e-10	6.87006e-09
ENSG00000119401.10	TRIM32	0.837032	0.000136979	0.00220368
ENSG00000214192.3	UBE2V1P2	0.453797	0.00399514	0.0355798
ENSG00000285314.1	NA	11.7288	0.000513937	0.00686549
ENSG00000144488.14	ESPNL	0.352763	0.00222308	0.0224358
ENSG00000164109.13	MAD2L1	-2.95573	1.68346e-88	4.79758e-86
ENSG00000135476.11	ESPL1	-2.45304	4.04715e-89	1.19873e-86
ENSG00000145833.15	DDX46	-0.218857	0.0022536	0.02268
ENSG00000128059.8	PPAT	-0.473825	0.000578273	0.00758387
ENSG00000119969.14	HELLS	-1.57861	1.80751e-12	9.46121e-11
ENSG00000158406.4	H4C8	0.671683	0.0029869	0.0284795
ENSG00000169813.16	HNRNPF	-0.263477	1.3611e-05	0.000298014
ENSG00000103647.12	CORO2B	-0.535471	2.0505e-12	1.06709e-10
ENSG00000141543.10	EIF4A3	-0.206267	0.00146438	0.0162494
ENSG00000113013.13	HSPA9	-0.33312	1.86384e-06	4.82876e-05
ENSG00000124767.6	GLO1	-0.264169	0.00199642	0.0208152
ENSG00000182704.7	TSKU	0.427014	2.42802e-06	6.18336e-05
ENSG00000104177.17	MYEF2	-0.5343	3.34155e-07	9.75515e-06
ENSG00000121039.9	RDH10	0.488159	4.61846e-07	1.30995e-05
ENSG00000184575.11	XPOT	-0.621213	2.66238e-07	7.9009e-06
ENSG00000096746.17	HNRNPH3	-0.350901	1.03378e-09	4.18971e-08
ENSG00000115694.14	STK25	0.233577	0.00139374	0.0155617
ENSG00000047410.13	TPR	-0.217259	6.35459e-05	0.00114319
ENSG00000197415.11	VEPH1	-0.395092	4.35289e-05	0.000826129
ENSG00000131873.6	CHSY1	-0.225082	0.00369668	0.0334865
ENSG00000132436.11	FIGNL1	-0.885758	0.000291502	0.00422415
ENSG00000097046.12	CDC7	-1.11654	2.59801e-07	7.72264e-06
ENSG00000180573.9	H2AC6	0.833453	1.43347e-07	4.46815e-06
ENSG00000105173.13	CCNE1	-0.579089	0.000182813	0.00282951
ENSG00000134910.13	STT3A	-0.204102	0.00448459	0.0388339
ENSG00000072062.13	PRKACA	0.610041	0.000291508	0.00422415
ENSG00000086065.13	CHMP5	0.196891	0.00200446	0.020879
ENSG00000285338.1	NA	1.94391	0.000167719	0.00262989
ENSG00000123485.11	HJURP	-2.66982	7.73689e-53	1.27439e-50
ENSG00000113810.15	SMC4	-1.23506	3.12398e-19	2.37661e-17
ENSG00000183615.5	FAM167B	0.298088	0.00259303	0.0254958
ENSG00000197324.8	LRP10	0.312686	0.000252258	0.00372454
ENSG00000101057.15	MYBL2	-5.41735	7.04148e-265	1.1493e-261
ENSG00000092820.17	EZR	-0.434282	1.09708e-06	2.93111e-05
ENSG00000143786.7	CNIH3	-0.529925	0.000945812	0.0114003
ENSG00000125629.14	INSIG2	-0.276896	0.00598979	0.048705
ENSG00000123505.15	AMD1	-0.386361	7.77551e-06	0.000179206
ENSG00000235106.9	BRD3OS	0.371905	0.00268986	0.0262038
ENSG00000187840.4	EIF4EBP1	-1.00387	1.69444e-38	2.0837e-36
ENSG00000186281.12	GPAT2	-0.543951	6.57895e-06	0.0001536
ENSG00000284505.1	LYNX1-SLURP2	1.74087	1.68659e-10	7.33197e-09
ENSG00000284770.1	TBCE	-0.669665	0.00326537	0.0305256
ENSG00000177000.12	MTHFR	0.26195	3.69347e-05	0.000716119
ENSG00000070669.16	ASNS	-1.26605	2.48732e-08	8.65451e-07
ENSG00000149926.13	TLCD3B	-2.00773	0.000920362	0.0111424
ENSG00000121410.11	A1BG	0.728406	5.76723e-07	1.61125e-05
ENSG00000172216.5	CEBPB	0.34674	0.000179954	0.00279731
ENSG00000115541.10	HSPE1	-0.371593	1.82452e-06	4.74058e-05
ENSG00000136122.15	BORA	-1.50142	2.14991e-14	1.26972e-12
ENSG00000166582.9	CENPV	-0.477301	0.00529702	0.0439883
ENSG00000120725.12	SIL1	0.300949	2.04728e-07	6.17763e-06
ENSG00000234287.1	NA	0.814503	2.50651e-05	0.000514307
ENSG00000276168.1	RN7SL1	0.547194	0.00082781	0.0102783
ENSG00000151065.13	DCP1B	0.256076	0.000985305	0.0117856
ENSG00000026025.15	VIM	-0.322735	1.17668e-10	5.2422e-09
ENSG00000124831.18	LRRFIP1	-0.293084	1.02018e-07	3.2361e-06
ENSG00000142945.12	KIF2C	-5.5775	0	0
ENSG00000076258.9	FMO4	0.254545	0.0046951	0.0403149
ENSG00000223749.9	MIR503HG	-0.536697	0.00448599	0.0388339
ENSG00000123374.10	CDK2	-0.815547	6.86407e-06	0.000159428
ENSG00000163689.20	CFAP20DC	-0.640687	0.000837724	0.0103656
ENSG00000134440.11	NARS1	-0.356141	0.000402078	0.00557875
ENSG00000004487.16	KDM1A	-0.225396	0.00102654	0.0121975
ENSG00000132016.11	BRME1	-0.991339	7.32102e-05	0.00128808
ENSG00000262903.1	NA	0.693391	0.00207053	0.0213033
ENSG00000178966.16	RMI1	-0.714458	9.17376e-05	0.00156119
ENSG00000080345.17	RIF1	-0.364068	9.00296e-07	2.43066e-05
ENSG00000160957.12	RECQL4	-2.01634	1.42023e-18	1.03654e-16
ENSG00000284503.1	MIR3652	2.04892	0.000741592	0.0093501
ENSG00000234546.3	LNCTAM34A	0.63596	4.69414e-08	1.55783e-06
ENSG00000255624.3	NA	-5.98454	3.41592e-06	8.4013e-05
ENSG00000126432.13	PRDX5	0.214598	0.00149555	0.0165237
ENSG00000101210.11	EEF1A2	0.397611	3.19061e-05	0.000632409
ENSG00000174684.6	B4GAT1	0.305945	5.40196e-07	1.51779e-05
ENSG00000175886.10	RPL7AP66	0.520285	0.00612986	0.0495586
ENSG00000258674.5	NA	-0.63977	0.00489753	0.0416446
ENSG00000246705.4	H2AJ	0.230512	0.000647689	0.00834378
ENSG00000265401.1	NA	1.10123	0.00095329	0.0114331
ENSG00000196072.11	BLOC1S2	0.289467	0.00043451	0.00594602
ENSG00000230006.7	ANKRD36BP2	-7.20173	1.13841e-07	3.57723e-06
ENSG00000213593.9	TMX2	-0.363484	2.00629e-06	5.18288e-05
ENSG00000057019.15	DCBLD2	-0.190969	0.00557587	0.0459638
ENSG00000112877.7	CEP72	-1.05878	1.96471e-06	5.08276e-05
ENSG00000118412.12	CASP8AP2	-0.299992	0.00454576	0.0392756
ENSG00000178691.10	SUZ12	-0.390531	0.00159919	0.01738
ENSG00000137168.7	PPIL1	-0.25655	0.000223713	0.00334992
ENSG00000110900.14	TSPAN11	1.06979	5.36213e-25	4.96246e-23
ENSG00000108829.9	LRRC59	-0.247972	0.00135373	0.015241
ENSG00000155561.14	NUP205	-0.460717	6.71716e-11	3.06091e-09
ENSG00000137547.8	MRPL15	-0.264038	0.00341713	0.0315517
ENSG00000165119.20	HNRNPK	-0.192798	0.0011228	0.0131842
ENSG00000123610.4	TNFAIP6	-1.34807	0.00140211	0.0156454
ENSG00000188153.13	COL4A5	0.26434	0.000194386	0.00298291
ENSG00000139505.11	MTMR6	-0.320268	0.000428703	0.00587552
ENSG00000104689.9	TNFRSF10A	0.606892	3.71014e-08	1.25446e-06
ENSG00000156471.12	PTDSS1	-0.181288	0.00208364	0.0213788
ENSG00000188157.14	AGRN	0.438053	2.4928e-13	1.38563e-11
ENSG00000120690.15	ELF1	0.394151	3.03588e-05	0.000607649
ENSG00000185236.11	RAB11B	0.189028	0.0050549	0.0425622
ENSG00000273173.5	SNURF	1.32091	3.12969e-06	7.73972e-05
ENSG00000012963.14	UBR7	-0.392526	0.000789798	0.0098678
ENSG00000005238.19	FAM214B	0.188714	0.00611201	0.0494971
ENSG00000031698.12	SARS1	-0.204459	5.03742e-05	0.000936251
ENSG00000215375.6	MYL5	0.399155	8.64689e-05	0.00147995
ENSG00000103966.10	EHD4	-0.208166	0.00129238	0.0146579
ENSG00000148688.13	RPP30	-0.384309	0.00138674	0.0154932
ENSG00000105204.13	DYRK1B	0.281943	0.000326299	0.0046495
ENSG00000240801.1	NA	0.996965	7.21282e-06	0.000167095
ENSG00000137812.19	KNL1	-5.12724	4.57915e-137	2.74047e-134
ENSG00000224578.5	HNRNPA1P48	-0.383934	5.82746e-05	0.00105576
ENSG00000145386.9	CCNA2	-4.13815	1.75397e-156	1.21118e-153
ENSG00000165757.8	JCAD	-0.339422	0.000110868	0.00181948
ENSG00000132646.10	PCNA	-0.366772	7.33703e-08	2.35651e-06
ENSG00000068078.18	FGFR3	-1.04009	0.000857441	0.0105586
ENSG00000276043.4	UHRF1	-2.03527	4.55475e-63	8.69957e-61
ENSG00000135314.12	KHDC1	-0.33862	0.00380267	0.0342564
ENSG00000106624.10	AEBP1	0.208017	0.000862377	0.0106049
ENSG00000237172.3	B3GNT9	0.270181	4.70431e-05	0.000881641
ENSG00000126456.15	IRF3	0.420443	0.000133758	0.00215767
ENSG00000116183.10	PAPPA2	-0.946467	5.19837e-06	0.000123129
ENSG00000071539.13	TRIP13	-2.87196	4.44354e-80	1.19074e-77
ENSG00000093167.17	LRRFIP2	0.212468	5.64589e-05	0.00102494
ENSG00000154217.14	PITPNC1	-0.437376	0.000101525	0.00168932
ENSG00000065911.11	MTHFD2	-0.933126	4.13889e-08	1.38896e-06
ENSG00000160685.13	ZBTB7B	0.326527	9.8801e-05	0.00165628
ENSG00000105520.10	PLPPR2	0.238887	0.000174579	0.00272792
ENSG00000048740.18	CELF2	-0.904014	1.97336e-05	0.000411974
ENSG00000135424.16	ITGA7	0.27259	0.00037526	0.0052595
ENSG00000168393.12	DTYMK	-0.685791	5.61545e-10	2.31769e-08
ENSG00000185070.10	FLRT2	0.298449	6.87889e-08	2.22129e-06
ENSG00000100889.11	PCK2	-0.766603	7.09558e-21	5.68723e-19
ENSG00000186318.16	BACE1	0.184834	0.00341973	0.0315517
ENSG00000173156.6	RHOD	0.328044	3.3051e-05	0.000652086
ENSG00000105287.12	PRKD2	0.203792	0.00149034	0.0164763
ENSG00000124207.16	CSE1L	-0.779774	2.91107e-11	1.36108e-09
ENSG00000103978.15	TMEM87A	-0.245564	0.00169246	0.0182282
ENSG00000170144.20	HNRNPA3	-0.416499	1.79896e-13	1.01568e-11
ENSG00000244187.7	TMEM141	0.447083	6.96617e-05	0.00123898
ENSG00000213024.11	NUP62	-0.273657	1.54675e-05	0.000331785
ENSG00000129173.12	E2F8	-7.81102	1.45075e-10	6.3684e-09
ENSG00000164163.10	ABCE1	-0.424037	0.00217004	0.0220867
ENSG00000006118.14	TMEM132A	0.272963	0.00311188	0.0294366
ENSG00000138160.5	KIF11	-3.16154	4.59962e-163	3.59051e-160
ENSG00000129038.15	LOXL1	0.281876	2.30292e-06	5.88984e-05
ENSG00000127241.16	MASP1	0.409778	9.80156e-05	0.00164465
ENSG00000177106.15	EPS8L2	0.391351	1.93115e-05	0.000404101
ENSG00000007047.14	MARK4	0.185256	0.00166521	0.0179778
ENSG00000096968.13	JAK2	-0.368642	0.00134389	0.0151591
ENSG00000074181.8	NOTCH3	0.308125	0.00268031	0.0261818
ENSG00000204262.12	COL5A2	0.170446	0.0031072	0.0294078
ENSG00000263812.5	LINC00908	0.885604	0.000455731	0.00620334
ENSG00000173867.10	DET1	1.42885	0.000308593	0.00443594
ENSG00000176912.3	TYMSOS	0.62173	0.0033359	0.0310486
ENSG00000234664.1	HMGN2P5	-0.727178	8.87536e-08	2.82532e-06
ENSG00000219451.3	RPL23P8	0.668466	0.00208217	0.0213788
ENSG00000262304.2	NA	-7.511	4.82369e-24	4.28736e-22
ENSG00000168542.14	COL3A1	0.256629	2.05848e-06	5.31004e-05
ENSG00000180801.13	ARSJ	-0.312421	4.85181e-06	0.000115991
ENSG00000137656.11	BUD13	-0.26743	0.00560478	0.0461809
ENSG00000115233.11	PSMD14	-0.342231	5.10442e-08	1.68775e-06
ENSG00000145781.8	COMMD10	-0.404752	0.0017408	0.0186359
ENSG00000146067.15	FAM193B	0.388794	0.00231908	0.0232738
ENSG00000186834.3	HEXIM1	0.364956	5.31391e-11	2.44631e-09
ENSG00000213885.3	RPL13AP7	1.04692	1.0339e-07	3.26232e-06
ENSG00000174371.16	EXO1	-3.26585	1.31811e-37	1.58828e-35
ENSG00000157106.16	SMG1	-0.401322	3.20327e-07	9.39732e-06
ENSG00000067057.16	PFKP	-0.305046	0.000542894	0.00719876
ENSG00000099889.13	ARVCF	0.387259	0.000946111	0.0114003
ENSG00000284707.1	NA	-1.27409	5.84519e-06	0.000137722
ENSG00000168906.12	MAT2A	-0.332565	0.000296081	0.00428007
ENSG00000188312.13	CENPP	-1.55829	9.72029e-16	6.21061e-14
ENSG00000101986.11	ABCD1	0.202499	0.00261574	0.0256942
ENSG00000184743.12	ATL3	-0.194334	0.0030551	0.0289759
ENSG00000157693.14	TMEM268	-0.567798	0.00325823	0.0304996
ENSG00000132475.10	H3-3B	-0.31038	0.000178315	0.00277598
ENSG00000125648.14	SLC25A23	0.224577	0.00266885	0.0260983
ENSG00000168297.15	PXK	-0.323233	0.000805804	0.0100468
ENSG00000155368.16	DBI	-0.249701	0.000592053	0.00773633
ENSG00000197111.15	PCBP2	-0.175672	0.000878901	0.0107492
ENSG00000128408.8	RIBC2	-4.42942	3.81107e-13	2.07975e-11
ENSG00000166532.15	RIMKLB	-0.529476	7.69958e-05	0.00134212
ENSG00000182165.17	TP53TG1	0.389058	0.00432841	0.0380013
ENSG00000228288.6	PCAT6	0.639009	7.90495e-07	2.17011e-05
ENSG00000181163.13	NPM1	-0.369643	0.000559178	0.00736573
ENSG00000188783.5	PRELP	0.221067	0.000369981	0.00520582
ENSG00000102385.12	DRP2	-1.43868	0.00464082	0.0399623
ENSG00000129103.17	SUMF2	0.181002	0.000944244	0.0113978
ENSG00000137822.12	TUBGCP4	-0.239623	0.00174173	0.0186359
ENSG00000257038.1	LOC100287837	0.477265	0.000817206	0.0101607
ENSG00000147874.10	HAUS6	-0.643351	1.45635e-11	6.97263e-10
ENSG00000064961.18	HMG20B	-0.511562	0.00347307	0.0318693
ENSG00000158164.6	TMSB15A	-3.90119	5.85907e-07	1.63091e-05
ENSG00000131669.9	NINJ1	0.417295	1.0298e-08	3.77328e-07
ENSG00000182196.13	ARL6IP4	0.249944	0.0033141	0.0308937
ENSG00000116670.14	MAD2L2	-0.446203	1.28254e-07	4.01863e-06
ENSG00000100941.8	PNN	-0.259436	0.00423742	0.0373301
ENSG00000158270.11	COLEC12	0.187747	0.00536623	0.0445013
ENSG00000162298.18	SYVN1	0.540518	2.86972e-07	8.47416e-06
ENSG00000127415.12	IDUA	0.363654	3.20025e-05	0.000633486
ENSG00000188486.3	H2AX	-1.16623	1.42383e-35	1.60776e-33
ENSG00000140511.11	HAPLN3	0.436982	0.00546676	0.0452363
ENSG00000185088.13	RPS27L	0.386468	3.5149e-07	1.02114e-05
ENSG00000160058.18	BSDC1	0.221562	0.000559163	0.00736573
ENSG00000171223.5	JUNB	0.444506	0.000540027	0.00717664
ENSG00000088298.12	EDEM2	0.269028	0.000219727	0.00330677
ENSG00000130816.15	DNMT1	-0.705559	2.18726e-14	1.28754e-12
ENSG00000132000.12	PODNL1	0.539039	9.7664e-13	5.20314e-11
ENSG00000183431.11	SF3A3	-0.178805	0.00218782	0.0221717
ENSG00000157212.18	PAXIP1	-0.400325	7.59184e-06	0.000175423
ENSG00000131711.14	MAP1B	-0.428799	0.000495766	0.00665743
ENSG00000100439.10	ABHD4	0.226781	0.000267906	0.00391374
ENSG00000167995.15	BEST1	0.301967	0.00496103	0.0419549
ENSG00000249306.5	LINC01411	1.11965	9.15153e-13	4.91936e-11
ENSG00000185760.15	KCNQ5	-0.638883	9.01522e-06	0.00020519
ENSG00000198604.10	BAZ1A	-0.271838	2.50547e-05	0.000514307
ENSG00000111331.12	OAS3	-0.58122	3.18726e-05	0.000632409
ENSG00000139350.11	NEDD1	-0.367028	0.000168503	0.00263988
ENSG00000071794.15	HLTF	-0.416586	5.5674e-07	1.55939e-05
ENSG00000165209.18	STRBP	-0.523384	0.000350727	0.00495824
ENSG00000070882.12	OSBPL3	0.24548	5.09027e-05	0.000944119
ENSG00000106305.9	AIMP2	-0.393235	7.03756e-05	0.00124675
ENSG00000172780.16	RAB43	0.998311	0.00194837	0.0204329
ENSG00000101224.17	CDC25B	-0.514091	2.76166e-05	0.000558365
ENSG00000231312.6	MAP4K3-DT	0.360719	0.00218313	0.0221571
ENSG00000113070.7	HBEGF	-0.704963	7.91195e-05	0.00136983
ENSG00000099814.15	CEP170B	0.337332	0.00240085	0.0239205
ENSG00000213390.10	ARHGAP19	-0.726984	1.40769e-17	9.7582e-16
ENSG00000115687.13	PASK	-1.40104	4.84419e-15	2.93827e-13
ENSG00000257529.5	RPL36A-HNRNPH2	0.429634	0.00292679	0.0279955
ENSG00000112902.11	SEMA5A	0.201173	0.000547963	0.00724991
ENSG00000159055.3	MIS18A	-0.879576	1.14911e-09	4.60518e-08
ENSG00000197170.9	PSMD12	-0.263865	0.00601908	0.0488547
ENSG00000139899.10	CBLN3	0.28948	0.0035784	0.0327121
ENSG00000115129.13	TP53I3	0.422279	5.27298e-05	0.000972981
ENSG00000182504.10	CEP97	-0.344343	0.0020804	0.0213788
ENSG00000101773.18	RBBP8	-0.621933	6.01718e-08	1.96066e-06
ENSG00000127586.16	CHTF18	-1.46555	4.22158e-12	2.15938e-10
ENSG00000143621.16	ILF2	-0.238327	0.00200832	0.0208854
ENSG00000188985.6	DHFRP1	-1.40095	5.45345e-08	1.78997e-06
ENSG00000116120.9	FARSB	-0.416074	3.10491e-07	9.12365e-06
ENSG00000104853.15	CLPTM1	0.387109	0.00151383	0.0166794
ENSG00000143476.17	DTL	-4.55415	8.65965e-56	1.50947e-53
ENSG00000185862.6	EVI2B	-4.08199	6.00116e-09	2.25408e-07
ENSG00000196839.12	ADA	0.349929	0.00326006	0.0305009
ENSG00000139998.15	RAB15	-0.3892	0.000847365	0.0104633
ENSG00000259316.11	NA	-4.90846	2.04879e-08	7.25522e-07
ENSG00000105855.9	ITGB8	0.271558	0.00246036	0.0243917
ENSG00000005189.19	REXO5	-1.17484	3.68316e-17	2.49537e-15
ENSG00000181026.14	AEN	0.289931	4.22915e-05	0.000805199
ENSG00000163781.13	TOPBP1	-0.655135	3.04733e-17	2.0803e-15
ENSG00000197045.12	GMFB	-0.578111	0.00252914	0.0249221
ENSG00000106992.18	AK1	0.472508	1.22831e-10	5.4452e-09
ENSG00000080824.18	HSP90AA1	-0.362404	6.99356e-05	0.00124196
ENSG00000138080.13	EMILIN1	0.212958	0.00138026	0.0154592
ENSG00000143797.11	MBOAT2	-0.277929	0.0029217	0.0279767
ENSG00000198408.13	OGA	-0.229382	0.000780326	0.00975625
ENSG00000051523.10	CYBA	0.379593	4.15238e-05	0.000792261
ENSG00000242858.1	RPL13AP14	1.83656	0.00254666	0.0250811
ENSG00000166451.13	CENPN	-0.962633	7.01405e-25	6.42502e-23
ENSG00000145819.16	ARHGAP26	-0.956395	5.81211e-07	1.62035e-05
ENSG00000198753.11	PLXNB3	0.579955	9.40991e-10	3.83097e-08
ENSG00000160695.14	VPS11	0.194713	0.00359851	0.0328291
ENSG00000131470.14	PSMC3IP	-2.26025	2.26619e-20	1.79239e-18
ENSG00000175063.16	UBE2C	-5.16077	1.33918e-254	2.00364e-251
ENSG00000137054.15	POLR1E	-0.231248	0.00193468	0.020313
ENSG00000174282.11	ZBTB4	0.248633	1.56346e-05	0.000334172
ENSG00000146670.9	CDCA5	-3.06543	7.22396e-208	7.62935e-205
ENSG00000180596.7	H2BC4	0.827585	1.52053e-05	0.00032694
ENSG00000147799.11	ARHGAP39	0.285497	0.00528785	0.0439528
ENSG00000149823.8	VPS51	0.202649	0.00243663	0.0241965
ENSG00000183831.6	ANKRD45	-2.76161	0.00211109	0.0216092
ENSG00000122644.12	ARL4A	-0.598842	3.63739e-05	0.000707536
ENSG00000198933.9	TBKBP1	0.338525	3.72993e-05	0.000721629
ENSG00000176887.6	SOX11	-2.08517	2.91287e-06	7.24345e-05
ENSG00000109685.17	NSD2	-0.779031	2.35502e-11	1.11151e-09
ENSG00000203760.8	CENPW	-2.24986	1.24531e-60	2.28146e-58
ENSG00000197321.14	SVIL	0.246488	0.0004701	0.006346
ENSG00000226964.1	RHEBP2	-0.54589	4.85341e-05	0.000906657
ENSG00000114023.15	FAM162A	0.565953	6.64267e-09	2.48464e-07
ENSG00000163083.5	INHBB	0.894361	2.83322e-06	7.06496e-05
ENSG00000185262.8	UBALD2	-0.468904	4.29365e-11	1.99194e-09
ENSG00000257599.2	OVCH1-AS1	0.572478	0.000245955	0.00363746
ENSG00000184635.15	ZNF93	-1.46897	7.31422e-07	2.0172e-05
ENSG00000117533.14	VAMP4	0.549674	0.00010659	0.00176055
ENSG00000104381.12	GDAP1	-1.04663	0.00380936	0.0342874
ENSG00000170779.10	CDCA4	-1.20388	1.80745e-13	1.01727e-11
ENSG00000164045.11	CDC25A	-1.08006	4.78632e-16	3.09113e-14
ENSG00000189320.8	FAM180A	-0.368932	0.00503007	0.0424389
ENSG00000100299.17	ARSA	0.324365	2.07221e-07	6.24235e-06
ENSG00000171503.11	ETFDH	0.216531	0.00436205	0.0381658
ENSG00000116661.10	FBXO2	0.439802	0.000151284	0.00239731
ENSG00000100997.18	ABHD12	0.462361	0.000395595	0.00550156
ENSG00000116161.17	CACYBP	-0.565736	2.95176e-08	1.0172e-06
ENSG00000105926.15	MPP6	-0.489618	0.0015606	0.0170903
ENSG00000182541.17	LIMK2	0.322404	0.00235673	0.0235857
ENSG00000033178.12	UBA6	-0.400761	0.00217305	0.0220974
ENSG00000123136.14	DDX39A	-0.914288	2.44596e-10	1.04808e-08
ENSG00000250337.5	PURPL	0.875298	8.54062e-07	2.32297e-05
ENSG00000126368.5	NR1D1	-0.44111	0.000571597	0.00751278
ENSG00000244219.6	TMEM225B	0.515996	0.00144908	0.0160895
ENSG00000182481.8	KPNA2	-1.16617	5.07298e-35	5.65716e-33
ENSG00000048392.11	RRM2B	0.446507	5.39219e-05	0.000988881
ENSG00000170540.14	ARL6IP1	-1.26638	1.09845e-37	1.3416e-35
ENSG00000113721.13	PDGFRB	0.18614	0.00159682	0.0173754
ENSG00000147274.14	RBMX	-0.461645	1.56751e-12	8.22897e-11
ENSG00000189129.13	PLAC9	0.278725	0.00182014	0.0192796
ENSG00000075303.12	SLC25A40	-0.402986	0.000254653	0.00375372
ENSG00000101003.9	GINS1	-2.02608	1.11624e-37	1.35413e-35
ENSG00000102753.9	KPNA3	-0.302419	0.00135786	0.0152655
ENSG00000101825.7	MXRA5	0.27277	0.000110582	0.00181775
ENSG00000197646.7	PDCD1LG2	-0.475647	2.5553e-05	0.000521932
ENSG00000138395.14	CDK15	-1.28172	1.36882e-08	4.94483e-07
ENSG00000149548.14	CCDC15	-1.31652	3.53047e-15	2.17075e-13
ENSG00000227081.5	NA	0.616884	4.2454e-06	0.000103282
ENSG00000182957.15	SPATA13	-0.490953	0.000150657	0.00238948
ENSG00000082898.16	XPO1	-0.555293	5.87523e-06	0.000138249
ENSG00000259768.5	NA	-0.738356	8.55231e-07	2.32297e-05
ENSG00000153721.18	CNKSR3	-0.280205	0.00230847	0.0231803
ENSG00000119574.12	ZBTB45	0.539175	2.4428e-10	1.04808e-08
ENSG00000136824.18	SMC2	-0.758934	1.28043e-17	8.91039e-16
ENSG00000164751.14	PEX2	0.619349	0.00236715	0.0236636
ENSG00000165304.7	MELK	-2.48398	1.38603e-127	7.54085e-125
ENSG00000198924.7	DCLRE1A	-0.570595	1.55852e-06	4.09088e-05
ENSG00000168918.13	INPP5D	1.17773	3.74902e-08	1.26522e-06
ENSG00000083642.18	PDS5B	-0.345962	0.00470085	0.0403245
ENSG00000139182.14	CLSTN3	0.193035	0.00208468	0.0213788
ENSG00000171208.9	NETO2	-1.22365	3.08829e-05	0.000615395
ENSG00000100612.13	DHRS7	0.245795	8.32746e-05	0.00143034
ENSG00000183856.10	IQGAP3	-5.13298	0	0
ENSG00000105821.14	DNAJC2	-0.275089	0.00376573	0.0339919
ENSG00000108846.15	ABCC3	0.303559	3.42938e-05	0.000673644
ENSG00000111206.12	FOXM1	-1.64997	2.77372e-10	1.17451e-08
ENSG00000176749.8	CDK5R1	-0.618567	0.000613491	0.00798161
ENSG00000147065.16	MSN	-0.205556	0.00477952	0.0408821
ENSG00000198246.8	SLC29A3	0.473104	0.000233645	0.00348121
ENSG00000215492.6	HNRNPA1P7	-0.373079	7.62333e-06	0.000175924
ENSG00000135956.8	TMEM127	0.195898	0.000766878	0.00960149
ENSG00000262526.2	NA	1.22774	9.44105e-13	5.04478e-11
ENSG00000176890.15	TYMS	-1.33364	1.47755e-36	1.71148e-34
ENSG00000166224.16	SGPL1	-0.194244	0.00477864	0.0408821
ENSG00000072849.10	DERL2	0.323771	0.00101668	0.0120969
ENSG00000131446.16	MGAT1	0.173323	0.0056729	0.046604
ENSG00000010322.15	NISCH	0.246511	0.00221322	0.0223739
ENSG00000099783.11	HNRNPM	-0.448494	1.15084e-16	7.56854e-15
ENSG00000166226.12	CCT2	-0.279249	2.96331e-05	0.000595114
ENSG00000214826.5	DDX12P	-1.8408	1.02388e-07	3.2421e-06
ENSG00000175567.8	UCP2	-0.430064	0.0011592	0.013497
ENSG00000158445.9	KCNB1	0.693106	7.11774e-05	0.00125903
ENSG00000148841.16	ITPRIP	-0.337311	2.49925e-06	6.31994e-05
ENSG00000205208.4	C4orf46	-0.67867	2.23906e-08	7.86695e-07
ENSG00000186111.9	PIP5K1C	0.216382	0.000739872	0.00933497
ENSG00000130684.13	ZNF337	0.301032	0.000140631	0.00225436
ENSG00000171848.14	RRM2	-4.3126	1.21009e-78	3.1487e-76
ENSG00000072571.19	HMMR	-5.09463	2.36354e-140	1.51554e-137
ENSG00000180574.3	EIF2S3B	1.62722	0.00582185	0.0476198
ENSG00000030066.13	NUP160	-0.408832	1.3449e-06	3.5614e-05
ENSG00000135451.12	TROAP	-5.09696	7.32422e-127	3.84724e-124
ENSG00000197498.12	RPF2	-0.232976	0.00442248	0.0384962
ENSG00000132507.17	EIF5A	-0.25676	1.69576e-05	0.000358185
ENSG00000242779.6	ZNF702P	0.374079	0.00324933	0.030448
ENSG00000125107.17	CNOT1	-0.220426	0.00247127	0.0244863
ENSG00000136878.12	USP20	0.282707	0.000889818	0.0108605
ENSG00000134504.13	KCTD1	0.316592	0.00289713	0.0277858
ENSG00000163704.11	PRRT3	0.425291	1.07393e-05	0.000239468
ENSG00000115271.10	GCA	-0.533631	0.000980751	0.0117389
ENSG00000114346.13	ECT2	-0.901519	1.08125e-16	7.13704e-15
ENSG00000171813.13	PWWP2B	0.29161	0.00319971	0.0300458
ENSG00000116396.14	KCNC4	0.344405	0.000589151	0.00770402
ENSG00000167088.10	SNRPD1	-0.612627	1.01328e-10	4.54812e-09
ENSG00000179406.7	LINC00174	1.32728	7.82682e-05	0.0013564
ENSG00000182195.7	LDOC1	0.28647	5.63266e-05	0.00102357
ENSG00000198482.11	ZNF808	0.935123	3.80802e-08	1.28032e-06
ENSG00000196715.6	VKORC1L1	-0.234367	0.00358251	0.032733
ENSG00000174485.15	DENND4A	-0.229952	0.00225272	0.02268
ENSG00000198176.12	TFDP1	-0.205524	0.000872754	0.0106943
ENSG00000260001.6	TGFBR3L	0.634276	0.000519663	0.00692652
ENSG00000270069.1	MIR222HG	-0.660013	0.000208407	0.00316828
ENSG00000175054.14	ATR	-0.283102	0.00153319	0.0168463
ENSG00000106484.15	MEST	0.287699	0.00338237	0.0313026
ENSG00000135736.5	CCDC102A	0.26888	0.000411843	0.00569935
ENSG00000113569.15	NUP155	-0.540764	3.41005e-15	2.10392e-13
ENSG00000085788.13	DDHD2	-0.471632	0.00261675	0.0256942
ENSG00000130396.20	AFDN	-0.328796	0.00154735	0.0169707
ENSG00000161692.17	DBF4B	-1.30764	1.49532e-06	3.93074e-05
ENSG00000130522.5	JUND	0.369306	0.000114448	0.001868
ENSG00000157111.12	TMEM171	-0.743162	8.1434e-10	3.32288e-08
ENSG00000176974.19	SHMT1	-1.34658	2.65527e-18	1.93007e-16
ENSG00000188785.11	ZNF548	0.783379	0.00122134	0.0141197
ENSG00000126602.10	TRAP1	-0.234938	0.000243923	0.00361336
ENSG00000019991.16	HGF	-0.562989	0.00607047	0.0492495
ENSG00000168890.13	TMEM150A	0.46597	2.09188e-06	5.38074e-05
ENSG00000112759.17	SLC29A1	-0.355925	0.000229175	0.00342314
ENSG00000118193.11	KIF14	-5.75373	2.82292e-52	4.60752e-50
ENSG00000148110.15	MFSD14B	-0.240442	0.00166855	0.0180031
ENSG00000158825.5	CDA	0.232384	0.00205002	0.0211044
ENSG00000160293.16	VAV2	-0.331011	0.00553971	0.0457077
ENSG00000163017.13	ACTG2	-0.888757	5.47803e-05	0.00100053
ENSG00000213080.3	NA	-0.731411	0.0013379	0.0151073
ENSG00000105404.10	RABAC1	0.275323	0.00124325	0.0142364
ENSG00000137770.13	CTDSPL2	-0.596419	0.000547012	0.00724267
ENSG00000136542.8	GALNT5	0.324699	2.65088e-06	6.64719e-05
ENSG00000134802.17	SLC43A3	-0.618242	4.54793e-09	1.73362e-07
ENSG00000241634.1	RPL13P8	-2.11046	5.98139e-05	0.00108038
ENSG00000100519.11	PSMC6	-0.210115	0.00440311	0.0384501
ENSG00000138459.8	SLC35A5	0.772187	8.82718e-08	2.81563e-06
ENSG00000057252.12	SOAT1	-0.401766	0.00147685	0.0163564
ENSG00000218426.5	RPL27AP6	0.410077	0.000468533	0.00633436
ENSG00000156860.15	FBRS	0.199792	0.0041206	0.036462
ENSG00000173559.12	NABP1	0.344377	0.000131126	0.00212093
ENSG00000152359.14	POC5	-0.511927	0.00383555	0.0344649
ENSG00000089006.16	SNX5	-0.616238	3.52014e-05	0.00068921
ENSG00000165244.6	ZNF367	-3.74576	1.90522e-61	3.52643e-59
ENSG00000110801.13	PSMD9	-0.227172	0.000580952	0.00761344
ENSG00000148814.17	LRRC27	0.33525	8.01417e-05	0.00138352
ENSG00000177917.10	ARL6IP6	-0.413542	6.43988e-05	0.00115737
ENSG00000026559.13	KCNG1	-0.818135	1.03525e-11	5.00993e-10
ENSG00000100647.7	SUSD6	0.181653	0.00419171	0.037
ENSG00000145284.11	SCD5	0.199801	0.00265516	0.0260289
ENSG00000183741.11	CBX6	0.203553	0.00393739	0.0351701
ENSG00000165891.15	E2F7	-1.56745	7.55506e-44	1.05972e-41
ENSG00000168487.18	BMP1	0.229965	0.00302474	0.0287334
ENSG00000139990.17	DCAF5	0.449429	9.52236e-05	0.00160632
ENSG00000040275.16	SPDL1	-1.02258	5.32016e-21	4.30262e-19
ENSG00000131747.14	TOP2A	-4.35403	1.36635e-211	1.53322e-208
ENSG00000280206.1	NA	-0.994602	0.00441536	0.0384822
ENSG00000077942.18	FBLN1	0.472561	4.09749e-14	2.37311e-12
ENSG00000182010.10	RTKN2	-1.7974	3.76068e-15	2.30441e-13
ENSG00000075336.11	TIMM21	-0.465494	0.00446822	0.038725
ENSG00000101255.10	TRIB3	-0.690885	1.071e-08	3.90828e-07
ENSG00000124067.16	SLC12A4	0.278808	2.38724e-06	6.08815e-05
ENSG00000159231.5	CBR3	-0.402175	5.05507e-05	0.00093856
ENSG00000065060.16	UHRF1BP1	-0.297388	0.000150565	0.00238948
ENSG00000100526.19	CDKN3	-2.95453	3.43225e-75	8.10823e-73
ENSG00000120889.12	TNFRSF10B	0.320154	2.95251e-09	1.14739e-07
ENSG00000282907.1	NA	1.17673	0.00135483	0.015241
ENSG00000178573.6	MAF	0.375248	7.91912e-06	0.000182049
ENSG00000115355.16	CCDC88A	-0.336839	2.69328e-05	0.000546385
ENSG00000041880.14	PARP3	0.183051	0.00356502	0.0326397
ENSG00000064703.11	DDX20	-0.40608	0.00163899	0.0177589
ENSG00000099256.18	PRTFDC1	-0.4436	0.0052673	0.0438226
ENSG00000114779.19	ABHD14B	-0.765363	4.43985e-17	2.97437e-15
ENSG00000142751.14	GPN2	0.24659	0.000909428	0.0110323
ENSG00000156011.16	PSD3	0.463169	0.000834203	0.0103434
ENSG00000151725.11	CENPU	-3.94078	4.83352e-26	4.56742e-24
ENSG00000148180.19	GSN	0.321606	4.97566e-07	1.40461e-05
ENSG00000111237.18	VPS29	-0.381258	0.000336687	0.00478234
ENSG00000167513.8	CDT1	-3.19051	9.83041e-51	1.50851e-48
ENSG00000164611.12	PTTG1	-2.54478	1.18619e-217	1.41979e-214
ENSG00000275342.4	PRAG1	0.530379	1.45143e-05	0.000315866
ENSG00000173581.7	CCDC106	0.358407	1.09054e-06	2.91796e-05
ENSG00000069020.18	MAST4	0.233621	0.0031424	0.0296784
ENSG00000189308.10	LIN54	-0.32905	2.48015e-05	0.000510649
ENSG00000197977.3	ELOVL2	-1.29114	4.79136e-06	0.000114699
ENSG00000141696.12	P3H4	0.199158	0.00446349	0.038725
ENSG00000132963.7	POMP	-0.339248	0.00417342	0.0368567
ENSG00000224126.2	NA	-1.18018	2.27225e-09	8.9465e-08
ENSG00000111252.10	SH2B3	-0.25101	0.00319384	0.0300064
ENSG00000129534.13	MIS18BP1	-0.699046	6.41665e-12	3.17368e-10
ENSG00000137310.11	TCF19	-1.66593	5.45582e-09	2.05354e-07
ENSG00000006459.10	KDM7A	-0.360809	0.00417123	0.0368555
ENSG00000078902.15	TOLLIP	0.649814	0.002861	0.0275128
ENSG00000051180.16	RAD51	-2.39356	2.89188e-32	3.10903e-30
ENSG00000094804.10	CDC6	-3.01724	5.33662e-131	3.09077e-128
ENSG00000162745.10	OLFML2B	-1.38171	1.95587e-15	1.21088e-13
ENSG00000173638.18	SLC19A1	-0.334724	0.00490982	0.0417183
ENSG00000115226.9	FNDC4	0.236391	0.00107743	0.012718
ENSG00000089486.16	CDIP1	0.624518	1.94919e-07	5.92144e-06
ENSG00000260793.2	NA	0.739178	0.00397912	0.0354899
ENSG00000184445.11	KNTC1	-1.73504	9.1061e-65	1.77707e-62
ENSG00000140451.12	PIF1	-0.53076	1.3559e-05	0.000297239
ENSG00000145907.14	G3BP1	-0.305783	0.00086234	0.0106049
ENSG00000057608.16	GDI2	-0.184623	0.00107251	0.0126767
ENSG00000144554.10	FANCD2	-2.49468	1.98608e-51	3.15559e-49
ENSG00000243509.5	TNFRSF6B	5.71811	0.00155721	0.0170684
ENSG00000285077.1	ARHGAP11B	-1.8896	0.000144804	0.00231505
ENSG00000130643.8	CALY	0.702926	3.41503e-05	0.00067156
ENSG00000063660.8	GPC1	0.387891	4.99637e-06	0.000118814
ENSG00000166444.18	DENND2B	0.202987	0.00104616	0.0123815
ENSG00000101844.17	ATG4A	0.311261	0.00115312	0.0134524
ENSG00000105429.12	MEGF8	0.420372	1.50084e-05	0.000324261
ENSG00000140153.17	WDR20	0.683734	4.91146e-12	2.48396e-10
ENSG00000142731.10	PLK4	-3.33117	3.32785e-102	1.17154e-99
ENSG00000166446.14	CDYL2	-0.283659	0.00138534	0.0154872
ENSG00000161671.16	EMC10	0.282105	0.000403275	0.00559104
ENSG00000104320.13	NBN	-0.364064	0.0031488	0.0297233
ENSG00000261611.6	NA	-2.13448	0.00335558	0.031151
ENSG00000161677.11	JOSD2	0.276673	0.000510572	0.00683071
ENSG00000111602.11	TIMELESS	-1.55618	1.10785e-18	8.18532e-17
ENSG00000186193.8	SAPCD2	-4.31368	5.47613e-37	6.42605e-35
ENSG00000258924.4	NA	-11.0516	0.000950884	0.0114246
ENSG00000140400.16	MAN2C1	0.271808	0.0051154	0.0428567
ENSG00000137807.15	KIF23	-2.64169	4.83198e-119	2.28298e-116
ENSG00000175600.15	SUGCT	0.807831	6.53269e-10	2.68394e-08
ENSG00000132849.20	PATJ	0.253419	0.000576039	0.00756009
ENSG00000163655.15	GMPS	-0.441805	2.3397e-08	8.18849e-07
ENSG00000077514.8	POLD3	-0.756419	4.60689e-14	2.65956e-12
ENSG00000253293.4	HOXA10	0.221523	0.000690688	0.00881351
ENSG00000120800.4	UTP20	-0.312488	3.04542e-05	0.000608881
ENSG00000171863.14	RPS7	-0.153377	0.00221571	0.022374
ENSG00000277654.6	LOC440311	1.16879	2.24137e-05	0.000463612
ENSG00000224858.5	RPL29P11	0.542298	0.000756213	0.009513
ENSG00000057657.16	PRDM1	0.486141	6.56954e-07	1.82302e-05
ENSG00000178752.15	ERFE	-2.2922	5.5222e-12	2.76943e-10
ENSG00000267886.1	NA	-4.21194	7.6919e-09	2.84743e-07
ENSG00000165392.9	WRN	-0.334264	0.0053829	0.0446189
ENSG00000265817.2	FSBP	-2.08808	9.08125e-06	0.000206386
ENSG00000175305.17	CCNE2	-4.64549	3.60633e-22	3.02561e-20
ENSG00000124155.17	PIGT	0.257459	0.000411115	0.00569534
ENSG00000102172.15	SMS	-0.461148	5.54321e-07	1.55504e-05
ENSG00000267374.1	MIR924HG	-2.74827	8.09586e-10	3.311e-08
ENSG00000119705.9	SLIRP	-0.263311	0.00613617	0.0495586
ENSG00000172009.14	THOP1	-0.256146	0.0052475	0.0436781
ENSG00000197114.11	ZGPAT	0.522425	0.00117618	0.0136592
ENSG00000181773.6	GPR3	-0.822326	5.49049e-05	0.00100179
ENSG00000137804.12	NUSAP1	-3.63691	2.92689e-105	1.09478e-102
ENSG00000267470.5	ZNF571-AS1	2.01461	5.14076e-08	1.69664e-06
ENSG00000261105.5	LMO7-AS1	0.349989	2.60793e-06	6.5578e-05
ENSG00000198932.12	GPRASP1	0.794438	4.61851e-05	0.00086828
ENSG00000197635.9	DPP4	0.306233	0.00498175	0.0421103
ENSG00000124098.9	FAM210B	0.285253	0.00137433	0.0154121
ENSG00000234608.7	MAPKAPK5-AS1	0.449377	0.00519523	0.0433076
ENSG00000173486.12	FKBP2	0.241024	0.00560742	0.0461815
ENSG00000105976.14	MET	-0.501763	8.54345e-18	5.99176e-16
ENSG00000161642.17	ZNF385A	0.483677	2.99212e-07	8.80665e-06
ENSG00000116117.17	PARD3B	0.588692	0.000466473	0.00631127
ENSG00000111261.13	MANSC1	-1.05145	3.60674e-05	0.000702337
ENSG00000214189.9	NA	-0.901759	3.90955e-05	0.000752326
ENSG00000198826.10	ARHGAP11A	-2.2683	2.56028e-34	2.82007e-32
ENSG00000094916.15	CBX5	-0.354649	2.53224e-10	1.07734e-08
ENSG00000198832.10	SELENOM	0.504176	1.41181e-06	3.72213e-05
ENSG00000068650.18	ATP11A	-0.407087	8.37951e-07	2.28988e-05
ENSG00000160113.5	NR2F6	0.241044	0.00157459	0.0171855
ENSG00000232112.3	TMA7	0.323606	9.19064e-05	0.00156258
ENSG00000123179.13	EBPL	0.921325	4.92525e-05	0.000917301
ENSG00000246203.2	NA	-1.85411	0.00285789	0.0275123
ENSG00000169715.14	MT1E	-0.412993	0.000197337	0.0030256
ENSG00000260428.2	SCX	1.30373	0.00278078	0.0269288
ENSG00000150051.13	MKX	0.237944	0.00112707	0.0132172
ENSG00000133026.12	MYH10	-0.23203	0.004619	0.0398125
ENSG00000178184.15	PARD6G	0.882623	4.30918e-08	1.43805e-06
ENSG00000144115.16	THNSL2	0.276986	1.78263e-05	0.000374332
ENSG00000197582.5	GPX1P1	0.627795	3.44787e-06	8.46827e-05
ENSG00000138587.5	MNS1	-1.91373	1.70479e-07	5.25906e-06
ENSG00000230076.1	RPL10P6	0.565986	0.000217485	0.00327914
ENSG00000058056.8	USP13	-0.616768	2.08265e-11	9.91827e-10
ENSG00000171791.12	BCL2	-3.50336	0.00159856	0.01738
ENSG00000136068.14	FLNB	-0.73134	2.47312e-09	9.69486e-08
ENSG00000006576.16	PHTF2	-0.271116	0.00181017	0.0191973
ENSG00000156787.16	TBC1D31	-0.75063	2.20396e-07	6.61703e-06
ENSG00000206538.8	VGLL3	0.324553	0.000249741	0.00369042
ENSG00000141503.15	MINK1	0.173631	0.00469816	0.0403206
ENSG00000137941.16	TTLL7	-0.420265	6.68609e-05	0.00119802
ENSG00000157456.7	CCNB2	-3.77425	1.94512e-200	1.94015e-197
ENSG00000153820.12	SPHKAP	-0.639981	0.000715876	0.00908328
ENSG00000128272.14	ATF4	-0.351463	1.66235e-05	0.000351955
ENSG00000090238.11	YPEL3	0.406179	0.0017804	0.0189368
ENSG00000143845.14	ETNK2	0.294884	0.000229628	0.00342705
ENSG00000187824.8	TMEM220	0.325671	7.15928e-05	0.00126513
ENSG00000065882.15	TBC1D1	-0.204649	0.0052924	0.0439703
ENSG00000188042.7	ARL4C	-0.293951	0.00566661	0.046604
ENSG00000135482.6	ZC3H10	2.23996	1.90208e-07	5.80782e-06
ENSG00000250786.1	SNHG18	0.266542	0.000899736	0.0109518
ENSG00000156802.12	ATAD2	-1.36138	1.11534e-70	2.41263e-68
ENSG00000177189.13	RPS6KA3	-0.278596	0.00409808	0.0363343
ENSG00000120053.11	GOT1	-0.511575	1.7883e-10	7.75533e-09
ENSG00000180611.6	MB21D2	-0.218819	0.00322452	0.0302314
ENSG00000100097.11	LGALS1	-0.191741	0.00337759	0.0312826
ENSG00000104774.12	MAN2B1	0.208299	0.00166029	0.0179463
ENSG00000170312.15	CDK1	-4.81845	2.21986e-120	1.10709e-117
ENSG00000170634.12	ACYP2	0.437813	4.69237e-06	0.000112479
ENSG00000144381.16	HSPD1	-0.376319	7.04135e-05	0.00124675
ENSG00000157193.16	LRP8	-0.342092	0.00113284	0.0132674
ENSG00000163481.7	RNF25	0.57436	0.000198288	0.0030376
ENSG00000141682.11	PMAIP1	-0.677907	0.000666481	0.00855325
ENSG00000131153.8	GINS2	-3.63058	8.02941e-68	1.65701e-65
ENSG00000180211.5	RPL23P6	0.537636	0.00274204	0.0266111
ENSG00000149489.8	ROM1	0.466915	0.000757851	0.00951988
ENSG00000129195.15	PIMREG	-3.91693	1.74314e-70	3.72576e-68
ENSG00000005100.12	DHX33	-0.225687	0.00619437	0.0499388
ENSG00000181544.14	FANCB	-1.68667	4.20045e-10	1.76203e-08
ENSG00000156136.9	DCK	-0.788765	1.2695e-06	3.36671e-05
ENSG00000120875.8	DUSP4	0.359725	0.00201894	0.0209313
ENSG00000160226.15	CFAP410	0.327739	0.00301828	0.0286927
ENSG00000170271.10	FAXDC2	0.349816	0.000700336	0.00892394
ENSG00000176894.9	PXMP2	-0.483166	2.7789e-05	0.000560588
ENSG00000140939.14	NOL3	0.42632	9.72155e-07	2.6168e-05
ENSG00000117305.14	HMGCL	0.740522	3.70983e-06	9.07442e-05
ENSG00000216775.3	LOC730101	-0.387307	0.000867887	0.0106653
ENSG00000171320.14	ESCO2	-5.28107	2.40163e-39	3.10207e-37
ENSG00000075399.13	VPS9D1	0.359275	1.03377e-05	0.000231425
ENSG00000120549.17	KIAA1217	-0.341987	0.000147035	0.00234446
ENSG00000025772.7	TOMM34	-0.380359	1.45997e-05	0.00031734
ENSG00000167110.17	GOLGA2	0.188595	0.00169588	0.0182431
ENSG00000092201.9	SUPT16H	-0.245458	1.73394e-05	0.00036496
ENSG00000204410.14	MSH5	-1.28668	0.000144284	0.00230973
ENSG00000002822.15	MAD1L1	0.211001	0.00201922	0.0209313
ENSG00000136261.14	BZW2	-0.280553	4.13784e-05	0.000790328
ENSG00000136108.14	CKAP2	-1.95658	1.05887e-39	1.38766e-37
ENSG00000105373.18	NOP53	0.451262	1.53573e-07	4.77033e-06
ENSG00000125319.14	HROB	-1.34102	3.49637e-12	1.79354e-10
ENSG00000170485.16	NPAS2	-0.324856	0.000104201	0.00172585
ENSG00000100027.14	YPEL1	-1.03591	9.745e-05	0.00163669
ENSG00000257390.5	NA	-3.54999	0.00599651	0.0487376
ENSG00000116062.14	MSH6	-0.358186	0.00218827	0.0221717
ENSG00000144354.13	CDCA7	-2.72718	3.76091e-84	1.02308e-81
ENSG00000113368.11	LMNB1	-3.36154	1.76807e-198	1.67073e-195
ENSG00000255073.8	ZFP91-CNTF	-6.38618	3.95994e-05	0.000761208
ENSG00000245067.6	IGFBP7-AS1	1.38633	0.00218097	0.0221477
ENSG00000248672.5	LY75-CD302	-5.68451	9.01723e-06	0.00020519
ENSG00000031691.6	CENPQ	-1.11877	2.48443e-10	1.05951e-08
ENSG00000141295.13	SCRN2	0.244841	0.00187324	0.0197372
ENSG00000230979.3	RPL18AP6	0.398826	0.000276028	0.00401922
ENSG00000104805.15	NUCB1	0.456257	5.43154e-06	0.000128482
ENSG00000136378.14	ADAMTS7	0.407742	5.23825e-05	0.000967567
ENSG00000134690.10	CDCA8	-4.27925	1.8337e-268	3.29223e-265
ENSG00000115363.13	EVA1A	-0.270479	0.00112373	0.0131866
ENSG00000196550.10	FAM72A	-1.16494	6.26274e-05	0.0011278
ENSG00000146592.16	CREB5	-0.309747	0.00330659	0.0308397
ENSG00000167900.11	TK1	-3.5518	3.47361e-67	7.00733e-65
ENSG00000198624.12	CCDC69	0.932344	0.00304567	0.028917
ENSG00000169607.12	CKAP2L	-2.93559	9.68563e-115	4.3474e-112
ENSG00000145780.7	FEM1C	-0.37216	0.000917507	0.0111153
ENSG00000102871.15	TRADD	0.29751	0.00184903	0.0195279
ENSG00000092853.13	CLSPN	-5.06784	8.42742e-73	1.84519e-70
ENSG00000176244.6	ACBD7	-2.38408	3.08355e-06	7.63615e-05
ENSG00000105202.8	FBL	-0.298225	0.00257384	0.0253314
ENSG00000004799.7	PDK4	0.743815	0.00402365	0.0357691
ENSG00000240914.1	NA	0.916179	0.000729882	0.0092448
ENSG00000100749.7	VRK1	-1.15576	9.20693e-13	4.93437e-11
ENSG00000259781.1	HMGB1P6	-0.858875	5.30842e-20	4.1438e-18
ENSG00000163637.12	PRICKLE2	0.261391	0.00542789	0.0449711
ENSG00000164754.14	RAD21	-0.603301	5.22197e-12	2.6262e-10
ENSG00000081870.11	HSPB11	-0.325169	0.00343362	0.0316302
ENSG00000112149.9	CD83	-0.40432	0.000608433	0.00792729
ENSG00000158373.8	H2BC5	0.992811	7.94418e-09	2.93477e-07
ENSG00000105290.11	APLP1	0.546934	1.46954e-06	3.86865e-05
ENSG00000179454.13	KLHL28	-0.409956	0.00343363	0.0316302
ENSG00000212864.3	RNF208	0.434288	0.00340149	0.0314444
ENSG00000265735.2	RN7SL5P	0.926097	0.000618132	0.00803035
ENSG00000126216.14	TUBGCP3	-0.345554	2.57025e-06	6.48122e-05
ENSG00000135931.17	ARMC9	0.309286	2.0253e-07	6.12159e-06
ENSG00000102024.17	PLS3	-0.392643	4.65196e-06	0.000111966
ENSG00000170345.9	FOS	0.715702	5.30654e-09	2.00576e-07
ENSG00000124587.13	PEX6	0.22815	0.00220011	0.0222539
ENSG00000055163.19	CYFIP2	0.90704	1.4687e-24	1.33177e-22
ENSG00000183128.7	CALHM3	-4.34605	0.000289022	0.00419831
ENSG00000136937.12	NCBP1	-0.298317	0.000360101	0.00507477
ENSG00000137825.10	ITPKA	-0.61583	0.00033185	0.00472485
ENSG00000184205.14	TSPYL2	0.499729	1.02769e-07	3.24843e-06
ENSG00000217930.7	PAM16	0.430826	0.000460269	0.00625088
ENSG00000078668.13	VDAC3	-0.274063	0.000904797	0.0110049
ENSG00000165655.16	ZNF503	0.492752	6.74054e-06	0.000157168
ENSG00000197959.13	DNM3	0.688458	0.000178112	0.00277588
ENSG00000181450.17	ZNF678	0.72369	0.00505095	0.042555
ENSG00000260912.1	NA	0.787296	3.85952e-05	0.000744294
ENSG00000159228.12	CBR1	0.548544	0.002392	0.0238678
ENSG00000203950.6	RTL8A	0.289182	0.00433628	0.0380327
ENSG00000133101.9	CCNA1	-2.87045	0.000764834	0.00958927
ENSG00000065183.15	WDR3	-0.202756	0.00372583	0.0336995
ENSG00000164024.11	METAP1	-0.58678	0.00166166	0.0179503
ENSG00000172270.19	BSG	0.274253	3.88539e-07	1.11792e-05
ENSG00000100350.14	FOXRED2	-0.715921	7.37418e-05	0.00129546
ENSG00000136010.13	ALDH1L2	-1.59771	0.000182024	0.00282216
ENSG00000242732.4	RTL5	0.449923	4.26832e-06	0.000103559
ENSG00000161513.11	FDXR	1.04281	3.6289e-30	3.74444e-28
ENSG00000145777.14	TSLP	-5.36488	0.000673261	0.00860949
ENSG00000228223.3	HCG11	0.276515	0.000480043	0.0064705
ENSG00000187624.8	C17orf97	0.386163	0.00403767	0.0358695
ENSG00000260482.3	NA	1.14353	0.000585087	0.00766203
ENSG00000107872.12	FBXL15	0.447563	1.23561e-05	0.000272869
ENSG00000091409.14	ITGA6	-0.294213	0.00610112	0.0494312
ENSG00000136859.9	ANGPTL2	0.394353	0.000112629	0.00184334
ENSG00000157181.15	ODR4	0.530572	0.000100044	0.00166777
ENSG00000125966.9	MMP24	0.387567	0.000209492	0.00317402
ENSG00000087053.18	MTMR2	-0.305238	0.000531977	0.0070749
ENSG00000101639.18	CEP192	-0.427809	3.67884e-08	1.24622e-06
ENSG00000130270.16	ATP8B3	-0.599163	7.54012e-07	2.07631e-05
ENSG00000245112.2	SMARCA5-AS1	1.22696	0.0032193	0.0301982
ENSG00000169508.6	GPR183	-5.21053	0.00021036	0.00318448
ENSG00000174332.5	GLIS1	0.240565	0.00446228	0.038725
ENSG00000237649.7	KIFC1	-4.46632	6.93817e-160	5.19033e-157
ENSG00000218891.4	ZNF579	0.934068	0.000245292	0.00363065
ENSG00000111348.8	ARHGDIB	-0.885652	6.23103e-05	0.00112321
ENSG00000165704.14	HPRT1	-0.540754	3.98296e-06	9.70287e-05
ENSG00000231607.10	DLEU2	-1.22691	0.000317534	0.00454264
ENSG00000158859.9	ADAMTS4	-1.64329	2.14214e-54	3.66286e-52
ENSG00000165480.15	SKA3	-4.95784	1.7725e-48	2.67424e-46
ENSG00000164692.17	COL1A2	0.21348	0.00411888	0.036462
ENSG00000184056.14	VPS33B	0.460842	0.000243731	0.00361336
ENSG00000130635.15	COL5A1	0.273421	3.05398e-05	0.000609236
ENSG00000132017.10	DCAF15	-0.402607	1.38897e-06	3.6673e-05
ENSG00000239282.7	CASTOR1	0.606958	0.00257491	0.0253314
ENSG00000121210.15	TMEM131L	-0.410337	0.000338718	0.00480359
ENSG00000143228.12	NUF2	-5.11641	4.41925e-115	2.03444e-112
ENSG00000175416.12	CLTB	0.299063	0.000256187	0.00376706
ENSG00000067182.7	TNFRSF1A	-0.231156	9.93107e-05	0.00166017
ENSG00000224677.1	PDIA3P2	0.817434	0.00321289	0.0301538
ENSG00000128513.14	POT1	-0.552179	0.000137384	0.00220823
ENSG00000138182.14	KIF20B	-2.43332	6.16317e-97	1.97596e-94
ENSG00000213967.10	ZNF726	-1.29595	0.00512943	0.0429342
ENSG00000178921.13	PFAS	-0.458015	2.38685e-06	6.08815e-05
ENSG00000196739.14	COL27A1	0.397913	5.41115e-05	0.000990335
ENSG00000174132.8	FAM174A	0.388438	4.2228e-07	1.20343e-05
ENSG00000136527.17	TRA2B	-0.232889	0.0021283	0.0217111
ENSG00000120539.14	MASTL	-0.919512	3.64459e-20	2.85742e-18
ENSG00000176531.10	PHLDB3	0.602488	2.35872e-11	1.11151e-09
ENSG00000119681.11	LTBP2	0.207888	0.00456838	0.0394331
ENSG00000184319.15	RPL23AP82	0.323459	0.000209314	0.00317401
ENSG00000183955.12	KMT5A	-0.702117	0.00245045	0.0243068
ENSG00000163071.10	SPATA18	0.722974	3.98863e-17	2.69217e-15
ENSG00000101367.8	MAPRE1	-0.332403	2.59798e-06	6.54195e-05
ENSG00000138698.14	RAP1GDS1	-0.426819	0.00073532	0.00929713
ENSG00000067955.13	CBFB	-0.422498	4.26428e-06	0.000103559
ENSG00000165672.6	PRDX3	-0.285868	0.000738285	0.00932149
ENSG00000233966.1	UBE2SP1	-0.922751	7.81557e-05	0.00135576
ENSG00000169679.14	BUB1	-4.76666	3.85633e-120	1.87126e-117
ENSG00000172845.14	SP3	-0.549618	3.89766e-09	1.49208e-07
ENSG00000242221.8	PSG2	0.445538	0.00111679	0.0131223
ENSG00000123416.15	TUBA1B	-1.22063	2.01361e-14	1.19315e-12
ENSG00000263155.5	MYZAP	0.976284	3.19128e-05	0.000632409
ENSG00000213551.4	DNAJC9	-0.59062	4.09399e-09	1.56391e-07
ENSG00000144395.17	CCDC150	-1.72437	5.33114e-10	2.20542e-08
ENSG00000130513.6	GDF15	0.832304	3.62794e-13	1.98586e-11
ENSG00000123600.19	METTL8	0.263849	0.00135468	0.015241
ENSG00000204381.11	LAYN	0.325785	1.89951e-07	5.80782e-06
ENSG00000163913.11	IFT122	-0.248465	0.00437639	0.038254
ENSG00000138385.15	SSB	-0.319549	0.00153779	0.0168866
ENSG00000117450.13	PRDX1	-0.50175	0.000872677	0.0106943
ENSG00000196363.9	WDR5	-0.215708	0.00083029	0.010302
ENSG00000196972.8	SMIM10L2B	0.39958	0.00240439	0.0239425
ENSG00000183580.9	FBXL7	-0.547892	0.00519576	0.0433076
ENSG00000023608.4	SNAPC1	-0.286695	0.00551508	0.0455254
ENSG00000177595.17	PIDD1	0.741929	3.35475e-23	2.88187e-21
ENSG00000052850.6	ALX4	0.351564	5.52217e-05	0.00100655
ENSG00000248429.5	FAM198B-AS1	0.9007	1.4489e-15	9.06393e-14
ENSG00000158828.7	PINK1	0.225073	0.000993929	0.0118729
ENSG00000189367.14	KIAA0408	1.42111	0.000493401	0.00664056
ENSG00000184992.10	BRI3BP	-0.688379	3.72328e-09	1.4345e-07
ENSG00000284820.1	NA	0.841601	0.00176124	0.0187886
ENSG00000168016.14	TRANK1	0.40241	4.6402e-05	0.000871445
ENSG00000131389.17	SLC6A6	1.3883	0.0013471	0.0151826
ENSG00000152894.14	PTPRK	0.186805	0.00175905	0.0187765
ENSG00000132326.11	PER2	-0.263879	0.00330255	0.0308181
ENSG00000189180.15	ZNF33A	0.655227	1.56338e-05	0.000334172
ENSG00000125885.13	MCM8	-0.996944	1.25596e-18	9.24163e-17
ENSG00000172409.5	CLP1	0.407335	7.26012e-05	0.00127918
ENSG00000152253.8	SPC25	-7.97403	3.16942e-09	1.22902e-07
ENSG00000005059.15	MCUB	-0.831893	4.38208e-05	0.000830791
ENSG00000042445.13	RETSAT	0.350138	3.05208e-05	0.000609236
ENSG00000011105.13	TSPAN9	0.253562	9.27346e-05	0.0015722
ENSG00000078808.16	SDF4	0.388159	6.85609e-05	0.0012236
ENSG00000151287.16	TEX30	-0.693777	1.68774e-05	0.00035691
ENSG00000106327.12	TFR2	-1.45544	0.00430841	0.0378997
ENSG00000049323.15	LTBP1	-0.278251	0.00489097	0.0416202
ENSG00000116285.12	ERRFI1	-0.805645	2.68235e-10	1.13851e-08
ENSG00000132423.11	COQ3	-0.5794	9.38906e-05	0.0015888
ENSG00000164087.7	POC1A	-1.97186	4.9208e-68	1.0273e-65
ENSG00000266208.1	NA	0.574538	2.31714e-10	9.97648e-09
ENSG00000078403.16	MLLT10	-0.301912	0.00266635	0.0260983
ENSG00000247675.6	LRP4-AS1	-5.40893	0.000178427	0.00277598
ENSG00000013016.15	EHD3	0.281068	0.00200897	0.0208854
ENSG00000075702.17	WDR62	-4.3748	2.17385e-102	7.80587e-100
ENSG00000141582.14	CBX4	0.335799	0.000160348	0.00252534
ENSG00000197417.7	SHPK	0.542256	0.00129144	0.0146564
ENSG00000242147.1	LINC02677	-1.81143	0.00197668	0.0206334
ENSG00000141574.7	SECTM1	0.383007	1.17089e-08	4.2469e-07
ENSG00000100416.13	TRMU	-0.327546	0.000132413	0.00213983
ENSG00000121440.14	PDZRN3	0.769411	1.2562e-12	6.67274e-11
ENSG00000138092.10	CENPO	-0.81383	1.09545e-08	3.9894e-07
ENSG00000166780.10	BMERB1	0.250982	0.00233247	0.023382
ENSG00000285641.1	NA	0.712811	0.0016285	0.0176665
ENSG00000172508.10	CARNS1	1.24374	0.00503328	0.042446
ENSG00000143418.19	CERS2	0.622538	0.000384128	0.00535869
ENSG00000198393.7	ZNF26	-0.603717	0.00193996	0.0203565
ENSG00000178951.8	ZBTB7A	0.379351	7.79859e-06	0.000179508
ENSG00000108518.7	PFN1	-0.179828	0.00514004	0.0429829
ENSG00000153944.10	MSI2	0.448517	4.41745e-07	1.25492e-05
ENSG00000138758.11	SEPTIN11	0.261039	0.00546997	0.0452363
ENSG00000140545.14	MFGE8	0.273843	0.00124013	0.0142286
ENSG00000156469.8	MTERF3	-0.603534	9.14114e-05	0.00155712
ENSG00000110042.7	DTX4	0.255116	0.00567321	0.046604
ENSG00000187123.14	LYPD6	-0.517849	0.000293659	0.00424847
ENSG00000125965.8	GDF5	0.804651	4.95355e-13	2.69503e-11
ENSG00000187091.13	PLCD1	0.289765	0.0058371	0.0477228
ENSG00000059588.9	TARBP1	-0.343609	0.000666363	0.00855325
ENSG00000213315.5	RPS18P2	1.44103	0.0027476	0.0266507
ENSG00000169258.6	GPRIN1	-0.835396	1.97881e-10	8.56084e-09
ENSG00000214357.8	NEURL1B	-2.76046	1.21318e-20	9.6378e-19
ENSG00000095397.13	WHRN	0.467101	3.25084e-05	0.000642793
ENSG00000232098.3	NA	0.282936	0.00408369	0.0362246
ENSG00000160194.17	NDUFV3	0.185273	0.00354547	0.0324772
ENSG00000156110.13	ADK	-0.217532	0.00431319	0.0379231
ENSG00000167733.13	HSD11B1L	0.533083	0.00524451	0.0436734
ENSG00000162746.14	FCRLB	-0.542641	0.00488906	0.0416202
ENSG00000061676.14	NCKAP1	-0.342871	0.00196178	0.0205495
ENSG00000168952.15	STXBP6	-0.50968	0.00121656	0.0140968
ENSG00000197903.7	H2BC12	0.545418	1.51961e-08	5.45663e-07
ENSG00000135763.9	URB2	-0.487109	1.60545e-07	4.9697e-06
ENSG00000112984.11	KIF20A	-5.10063	0	0
ENSG00000173209.23	AHSA2P	0.6259	0.00212478	0.0216998
ENSG00000120526.10	NUDCD1	-0.387018	9.44361e-06	0.000213003
ENSG00000145715.14	RASA1	-0.263767	0.00189596	0.0199531
ENSG00000261373.1	VPS9D1-AS1	-0.459006	0.0061169	0.0495143
ENSG00000188223.9	NA	2.18169	1.4887e-08	5.35635e-07
ENSG00000080608.9	PUM3	-0.264108	0.00124449	0.0142364
ENSG00000164040.16	PGRMC2	0.24454	0.00127019	0.014461
ENSG00000213563.6	C8orf82	0.365781	0.000357486	0.00504188
ENSG00000284691.1	NA	0.994719	0.00201053	0.0208896
ENSG00000065328.16	MCM10	-5.18456	8.76193e-41	1.17397e-38
ENSG00000229847.8	EMX2OS	0.881263	0.00186054	0.0196264
ENSG00000105948.13	TTC26	-0.532461	0.00124083	0.0142286
ENSG00000092096.16	SLC22A17	0.492636	0.000558805	0.00736573
ENSG00000166004.14	CEP295	-0.515264	3.57238e-05	0.000697539
ENSG00000115514.11	TXNDC9	-0.396981	0.000112144	0.00183787
ENSG00000179431.6	FJX1	-0.302912	0.000310824	0.00446086
ENSG00000060656.19	PTPRU	0.472731	4.43411e-10	1.84283e-08
ENSG00000197530.12	MIB2	0.431534	1.76209e-07	5.41721e-06
ENSG00000100908.13	EMC9	-0.386588	0.00250449	0.02472
ENSG00000078674.17	PCM1	-0.293814	0.00172427	0.0184932
ENSG00000176225.13	RTTN	-0.535901	4.92363e-08	1.63097e-06
ENSG00000138668.18	HNRNPD	-0.330632	1.53904e-05	0.000330526
ENSG00000266962.2	LOC108783654	0.264613	0.000321878	0.0045938
ENSG00000134697.12	GNL2	-0.251663	0.0015663	0.0171262
ENSG00000115875.18	SRSF7	-0.430797	0.00122509	0.014154
ENSG00000167325.14	RRM1	-0.796822	6.16992e-42	8.39202e-40
ENSG00000100321.14	SYNGR1	0.257603	0.000633092	0.00819505
ENSG00000166833.20	NAV2	-0.724639	2.45854e-25	2.29899e-23
ENSG00000220205.8	VAMP2	0.225884	0.000136944	0.00220368
ENSG00000156398.12	SFXN2	-0.752938	0.00466578	0.0401386
ENSG00000092470.11	WDR76	-2.28778	6.04344e-73	1.33956e-70
ENSG00000154237.12	LRRK1	0.237715	0.000371383	0.00521738
ENSG00000183688.4	RFLNB	-0.2415	0.0012386	0.0142286
ENSG00000258017.1	LOC105369760	-1.72682	0.000220589	0.00331492
ENSG00000184985.16	SORCS2	0.331323	0.0023531	0.0235625
ENSG00000176826.15	FKBP9P1	0.371071	3.55013e-06	8.70752e-05
ENSG00000213985.4	NA	-0.548437	0.00586599	0.0478936
ENSG00000125148.6	MT2A	-1.00001	2.45027e-12	1.26414e-10
ENSG00000180008.8	SOCS4	-0.43187	0.00434666	0.0380683
ENSG00000099864.17	PALM	0.57452	0.00283331	0.0273343
ENSG00000172167.7	MTBP	-1.26983	2.30293e-12	1.19155e-10
ENSG00000174080.10	CTSF	0.344065	1.35128e-06	3.57302e-05
ENSG00000171988.18	JMJD1C	-0.350401	3.10633e-05	0.000618244
ENSG00000182379.9	NXPH4	-0.731287	0.000156438	0.00246809
ENSG00000183207.13	RUVBL2	-0.535162	1.02822e-10	4.59221e-09
ENSG00000173535.14	TNFRSF10C	1.10032	7.04419e-18	4.99887e-16
ENSG00000012822.15	CALCOCO1	0.311561	4.66125e-07	1.32e-05
ENSG00000136891.13	TEX10	-0.358185	0.0030055	0.0286112
ENSG00000140525.17	FANCI	-1.89688	5.95518e-109	2.4865e-106
ENSG00000221963.5	APOL6	-0.396252	0.000145007	0.00231624
ENSG00000103024.7	NME3	0.544528	0.00291054	0.0278846
ENSG00000185697.16	MYBL1	-0.685203	1.65963e-10	7.2323e-09
ENSG00000237512.6	UNC5B-AS1	0.858679	0.00382247	0.0343831
ENSG00000119333.11	DYNC2I2	-0.509362	2.79361e-08	9.66408e-07
ENSG00000107738.19	VSIR	0.268602	0.00158027	0.017237
ENSG00000135316.17	SYNCRIP	-0.241316	0.00271201	0.0263624
ENSG00000119725.18	ZNF410	0.294242	0.00298554	0.0284795
ENSG00000135318.11	NT5E	-0.398408	1.31559e-05	0.000288755
ENSG00000174501.14	ANKRD36C	-0.840692	0.000944634	0.0113978
ENSG00000255154.7	HTD2	-1.00535	0.00549032	0.0453627
ENSG00000187514.16	PTMA	-0.348534	0.000494416	0.00664925
ENSG00000108559.11	NUP88	-0.423983	2.85883e-08	9.87066e-07
ENSG00000167536.13	DHRS13	-0.587003	0.000386422	0.00538651
ENSG00000198046.11	ZNF667	0.405794	0.000952922	0.0114331
ENSG00000151466.11	SCLT1	-0.572974	3.47357e-05	0.000680834
ENSG00000270504.1	NA	0.267206	0.00073749	0.00931802
ENSG00000167005.13	NUDT21	-0.279013	0.00325736	0.0304996
ENSG00000054654.16	SYNE2	-2.78135	6.04292e-32	6.4198e-30
ENSG00000198816.6	ZNF358	0.244513	0.00399794	0.035587
ENSG00000160783.19	PMF1	-0.354262	8.51604e-05	0.00145894
ENSG00000134363.11	FST	0.353981	5.16791e-08	1.70247e-06
ENSG00000145220.13	LYAR	-0.42311	5.56933e-05	0.00101412
ENSG00000239306.4	RBM14	-0.801752	3.94332e-15	2.40811e-13
ENSG00000187244.11	BCAM	0.307215	0.000112929	0.00184488
ENSG00000013583.9	HEBP1	0.245257	0.00411854	0.036462
ENSG00000132773.11	TOE1	-0.355291	0.00151428	0.0166794
ENSG00000123080.10	CDKN2C	-0.682444	7.44297e-05	0.00130536
ENSG00000171222.10	SCAND1	0.301696	0.00149835	0.0165446
ENSG00000140105.17	WARS1	-0.568652	4.5464e-10	1.88513e-08
ENSG00000249353.2	NPM1P27	-0.574503	3.6427e-05	0.000707804
ENSG00000186298.11	PPP1CC	-0.368021	0.00174064	0.0186359
ENSG00000136628.17	EPRS1	-0.416194	8.11812e-06	0.000186385
ENSG00000136982.5	DSCC1	-0.950273	1.20494e-05	0.00026675
ENSG00000163535.17	SGO2	-2.15062	1.54216e-43	2.12984e-41
ENSG00000248592.7	STIMATE-MUSTN1	-2.1293	0.000986974	0.0117977
ENSG00000157557.11	ETS2	-0.368163	1.85867e-05	0.000389389
ENSG00000198331.10	HYLS1	-0.946874	4.50491e-17	3.00674e-15
ENSG00000163683.11	SMIM14	0.204089	0.00243524	0.0241961
ENSG00000171729.13	TMEM51	-0.619912	0.00315922	0.0297746
ENSG00000187653.11	TMSB4XP8	-0.422653	0.000110661	0.00181775
ENSG00000115053.15	NCL	-0.258977	4.01748e-07	1.15408e-05
ENSG00000121621.6	KIF18A	-1.48366	9.79595e-21	7.81673e-19
ENSG00000178031.16	ADAMTSL1	-0.392472	0.000634939	0.00820836
ENSG00000278311.4	GGNBP2	-0.250474	0.00486424	0.0414685
ENSG00000116032.5	GRIN3B	0.95388	0.00148008	0.016373
ENSG00000103227.18	LMF1	0.355445	0.000184331	0.00284809
ENSG00000051825.14	MPHOSPH9	-0.507972	0.00308547	0.029233
ENSG00000213406.3	ANXA2P1	0.662581	0.00197023	0.0206259
ENSG00000187790.10	FANCM	-0.551015	0.00010848	0.00178988
ENSG00000186185.13	KIF18B	-5.54801	5.81029e-219	7.45128e-216
ENSG00000267317.2	NA	0.290718	0.00203986	0.0210481
ENSG00000079462.7	PAFAH1B3	-0.664988	0.00268571	0.0261919
ENSG00000152332.15	UHMK1	0.779456	7.84011e-11	3.56358e-09
ENSG00000269386.5	RAB11B-AS1	0.530575	0.0012347	0.0142011
ENSG00000144339.11	TMEFF2	-0.616836	0.00356953	0.0326477
ENSG00000119787.13	ATL2	-0.505007	0.000837107	0.0103651
ENSG00000147852.15	VLDLR	-0.259888	0.00609679	0.0494312
ENSG00000204947.8	ZNF425	0.345408	0.00316892	0.0298347
ENSG00000167967.15	E4F1	0.377778	0.00147498	0.0163467
ENSG00000197982.13	C1orf122	0.31453	6.71646e-05	0.00120107
ENSG00000113594.9	LIFR	-0.388103	6.49592e-06	0.000151859
ENSG00000154767.14	XPC	0.258312	0.000305539	0.00439907
ENSG00000163110.14	PDLIM5	-0.393409	0.00450777	0.0390036
ENSG00000185515.14	BRCC3	-0.403792	0.00425715	0.0374855
ENSG00000136149.6	RPL13AP25	0.568207	3.77658e-06	9.22513e-05
ENSG00000164251.4	F2RL1	-1.3602	3.77078e-05	0.000727963
ENSG00000174442.11	ZWILCH	-1.45114	5.18345e-47	7.50513e-45
ENSG00000134954.14	ETS1	-0.502975	1.08818e-13	6.20228e-12
ENSG00000165868.14	HSPA12A	-0.459809	0.00134418	0.0151591
ENSG00000269028.3	MTRNR2L2	0.921054	0.000675893	0.00863699
ENSG00000107949.16	BCCIP	-0.277262	0.000766095	0.00959837
ENSG00000160323.18	ADAMTS13	0.562358	1.62799e-05	0.000346128
ENSG00000143702.15	CEP170	-0.420744	2.42234e-05	0.000499893
ENSG00000122678.16	POLM	0.383289	9.90493e-05	0.00165734
ENSG00000111581.9	NUP107	-0.610436	5.29522e-09	2.0057e-07
ENSG00000111341.9	MGP	-0.698804	0.000192044	0.0029495
ENSG00000167550.10	RHEBL1	-4.56156	1.39068e-05	0.00030412
ENSG00000268388.5	FENDRR	-0.395138	0.00115912	0.013497
ENSG00000196460.13	RFX8	-0.924599	4.75948e-09	1.81042e-07
ENSG00000163453.11	IGFBP7	0.241718	0.00239423	0.0238678
ENSG00000164070.11	HSPA4L	0.787182	4.20533e-15	2.55941e-13
ENSG00000137831.14	UACA	-0.284489	0.00209547	0.0214616
ENSG00000177830.17	CHID1	0.241411	0.0049359	0.0418015
ENSG00000164236.11	ANKRD33B	0.46912	8.2898e-06	0.000190083
ENSG00000100567.12	PSMA3	-0.310782	0.00116216	0.0135226
ENSG00000134574.11	DDB2	0.662826	1.91275e-22	1.61228e-20
ENSG00000229124.6	VIM-AS1	0.523991	3.59139e-05	0.000700106
ENSG00000165804.15	ZNF219	0.542919	7.76899e-12	3.80067e-10
ENSG00000096996.15	IL12RB1	-2.1719	0.00506277	0.0425792
ENSG00000081087.14	OSTM1	0.263687	0.00035624	0.00502825
ENSG00000180998.11	GPR137C	-1.68129	1.07503e-05	0.000239468
ENSG00000177363.4	LRRN4CL	0.649203	2.41689e-14	1.41345e-12
ENSG00000176771.16	NCKAP5	0.397189	4.21116e-08	1.40795e-06
ENSG00000070367.15	EXOC5	-0.341783	0.00202936	0.0210122
ENSG00000136854.20	STXBP1	0.730149	1.46574e-05	0.000318208
ENSG00000119403.14	PHF19	-1.09995	1.06107e-27	1.04524e-25
ENSG00000182963.9	GJC1	-0.465274	0.000291213	0.00422415
ENSG00000154175.16	ABI3BP	-0.351397	8.05097e-07	2.20683e-05
ENSG00000248919.7	ATP5MF-PTCD1	1.42405	0.00378757	0.0341376
ENSG00000116127.17	ALMS1	-0.459389	0.000616879	0.00801988
ENSG00000187193.8	MT1X	-0.365616	0.00289329	0.0277638
ENSG00000160447.6	PKN3	-0.690614	4.68301e-06	0.000112479
ENSG00000172244.8	C5orf34	-1.03008	2.53707e-09	9.92385e-08
ENSG00000162804.13	SNED1	0.294438	0.00175101	0.0187128
ENSG00000135778.11	NTPCR	0.337233	8.31118e-07	2.27468e-05
ENSG00000099810.19	MTAP	-0.687967	0.000256621	0.00377035
ENSG00000235297.3	NA	0.658917	7.24449e-05	0.00127781
ENSG00000156256.14	USP16	-0.293776	0.0029426	0.0281168
ENSG00000131778.18	CHD1L	-0.298338	0.00185238	0.0195518
ENSG00000166986.14	MARS1	-0.458598	3.2614e-08	1.11322e-06
ENSG00000255717.6	SNHG1	-0.56793	7.24522e-05	0.00127781
ENSG00000137364.4	TPMT	-0.241785	0.00588031	0.0479595
ENSG00000214784.4	RPS3AP21	0.581998	0.0022386	0.022567
ENSG00000143995.19	MEIS1	0.304704	0.00492448	0.041776
ENSG00000133818.13	RRAS2	0.228599	4.52335e-05	0.000852175
ENSG00000138780.14	GSTCD	-0.513926	0.00054136	0.00718903
ENSG00000226121.2	NA	-0.407906	0.000949599	0.0114218
ENSG00000053372.4	MRTO4	-0.290504	0.00202922	0.0210122
ENSG00000126215.13	XRCC3	-1.94798	3.58409e-17	2.43745e-15
ENSG00000149294.16	NCAM1	-0.887471	0.000558655	0.00736573
ENSG00000090006.17	LTBP4	0.286808	0.000276246	0.00401922
ENSG00000182752.9	PAPPA	0.99763	2.5007e-29	2.551e-27
ENSG00000073111.13	MCM2	-1.99931	4.72775e-52	7.57875e-50
ENSG00000105664.10	COMP	0.306848	0.00392707	0.0351128
ENSG00000187951.11	LOC100288637	-2.10053	1.06089e-18	7.87078e-17
ENSG00000234335.1	RPS4XP11	1.20421	0.00308305	0.0292255
ENSG00000131462.7	TUBG1	-0.355306	0.00087858	0.0107492
ENSG00000086544.2	ITPKC	0.260278	0.000304685	0.0043903
ENSG00000181019.12	NQO1	-0.32257	1.70864e-05	0.000360481
ENSG00000087076.8	HSD17B14	0.643995	1.06392e-08	3.89036e-07
ENSG00000185361.8	TNFAIP8L1	-0.645315	1.16788e-09	4.66994e-08
ENSG00000115091.11	ACTR3	-0.246045	0.000396472	0.00550949
ENSG00000126860.11	EVI2A	-4.15474	0.00015351	0.00242616
ENSG00000178802.17	MPI	0.557563	4.21233e-07	1.20235e-05
ENSG00000157637.12	SLC38A10	0.189236	0.00143043	0.0159119
ENSG00000130787.13	HIP1R	0.251275	0.00198891	0.0207489
ENSG00000095002.14	MSH2	-0.902076	2.94671e-10	1.24483e-08
ENSG00000102900.12	NUP93	-0.34226	1.73823e-05	0.000365434
ENSG00000137207.11	YIPF3	0.289954	0.000183622	0.00283958
ENSG00000049541.10	RFC2	-0.606174	0.00203853	0.0210465
ENSG00000118655.5	DCLRE1B	-0.690787	1.62329e-05	0.000346128
ENSG00000255152.8	MSH5-SAPCD1	1.68524	0.00356708	0.0326419
ENSG00000177030.16	DEAF1	0.258475	2.58348e-05	0.00052649
ENSG00000237214.3	RPS9P2	0.681914	3.24446e-07	9.50262e-06
ENSG00000110958.15	PTGES3	-0.371834	0.00174743	0.0186858
ENSG00000087303.17	NID2	0.194413	0.0059146	0.0481809
ENSG00000145734.18	BDP1	-0.271163	0.00510057	0.042803
ENSG00000123700.4	KCNJ2	0.582015	0.000149119	0.00237348
ENSG00000137338.5	PGBD1	-0.348954	0.00504923	0.042555
ENSG00000145861.7	C1QTNF2	-1.22122	1.16139e-15	7.34208e-14
ENSG00000158201.9	ABHD3	-0.524449	0.00347055	0.0318693
ENSG00000130517.13	PGPEP1	0.543096	0.000899243	0.0109518
ENSG00000117118.9	SDHB	-0.195085	0.000929628	0.0112394
ENSG00000196199.13	MPHOSPH8	0.161165	0.00519373	0.0433076
ENSG00000120699.12	EXOSC8	-0.636663	5.90733e-08	1.92837e-06
ENSG00000139625.12	MAP3K12	0.186318	0.00432844	0.0380013
ENSG00000198805.11	PNP	-0.809064	6.44347e-12	3.17819e-10
ENSG00000180182.10	MED14	-0.238478	4.29591e-05	0.000816178
ENSG00000183527.11	PSMG1	-0.456794	9.77065e-06	0.000219552
ENSG00000226650.5	KIF4B	-5.70568	0.000209073	0.00317303
ENSG00000101945.16	SUV39H1	-1.05514	0.000647835	0.00834378
ENSG00000161714.11	PLCD3	0.346432	4.94522e-06	0.000117754
ENSG00000088305.18	DNMT3B	-1.03299	6.60723e-08	2.14127e-06
ENSG00000183763.8	TRAIP	-2.0379	2.3336e-34	2.58626e-32
ENSG00000160298.17	C21orf58	-0.973794	2.42521e-07	7.22094e-06
ENSG00000133706.17	LARS1	-0.349977	1.50517e-07	4.68349e-06
ENSG00000162783.10	IER5	0.286298	3.33631e-05	0.000657521
ENSG00000062582.13	MRPS24	0.253177	0.000381448	0.00532958
ENSG00000263740.2	RN7SL4P	1.18616	0.000708525	0.00900274
ENSG00000164099.3	PRSS12	0.230132	0.000575456	0.00755796
ENSG00000198618.5	PPIAP22	-0.240254	0.00169142	0.0182279
ENSG00000156509.13	FBXO43	-3.898	8.39223e-07	2.28988e-05
ENSG00000143815.14	LBR	-0.670502	6.17041e-12	3.06879e-10
ENSG00000130653.15	PNPLA7	0.415279	0.000585788	0.00766563
ENSG00000110011.13	DNAJC4	0.361336	0.00169418	0.0182358
ENSG00000132967.9	HMGB1P5	-0.864989	3.5655e-07	1.0325e-05
ENSG00000170835.14	CEL	0.651668	0.000770083	0.0096349
ENSG00000114745.13	GORASP1	0.426628	0.00376987	0.0339951
ENSG00000197771.12	MCMBP	-0.380624	4.85489e-09	1.84281e-07
ENSG00000006016.10	CRLF1	0.421473	6.79823e-07	1.88357e-05
ENSG00000182628.12	SKA2	-0.312185	0.00476536	0.0408193
ENSG00000196230.12	TUBB	-0.781852	3.21008e-09	1.24211e-07
ENSG00000196730.12	DAPK1	0.332875	0.000119406	0.00194186
ENSG00000149679.11	CABLES2	-0.300159	0.000469172	0.00633824
ENSG00000121211.7	MND1	-4.16333	1.58999e-23	1.39252e-21
ENSG00000173744.17	AGFG1	-0.338263	1.10432e-05	0.000245687
ENSG00000174799.10	CEP135	-0.58199	3.74132e-05	0.000723054
ENSG00000166963.12	MAP1A	0.352238	0.000373509	0.00524315
ENSG00000162607.12	USP1	-0.857439	6.07239e-10	2.50054e-08
ENSG00000140534.13	TICRR	-3.00408	5.12305e-51	7.92925e-49
ENSG00000182154.7	MRPL41	0.33409	0.000661106	0.00849641
ENSG00000123146.19	ADGRE5	-0.517372	1.02115e-10	4.572e-09
ENSG00000097021.19	ACOT7	-0.417816	4.34981e-06	0.000105393
ENSG00000223764.2	LINC02593	0.440257	0.00397574	0.0354773
ENSG00000114686.8	MRPL3	-0.25111	0.00163219	0.0176959
ENSG00000183826.17	BTBD9	0.612134	0.00562047	0.0462677
ENSG00000100490.9	CDKL1	-1.22269	4.00843e-05	0.000768882
ENSG00000167671.11	UBXN6	0.243685	0.00112812	0.0132208
ENSG00000187837.3	H1-2	0.845966	1.32253e-12	7.00432e-11
ENSG00000126453.9	BCL2L12	-0.544936	1.97235e-05	0.000411974
ENSG00000129355.6	CDKN2D	-0.692028	4.05586e-07	1.16324e-05
ENSG00000079156.16	OSBPL6	-1.27312	1.51676e-12	8.00937e-11
ENSG00000116514.16	RNF19B	0.272331	0.000392551	0.0054677
ENSG00000029993.14	HMGB3	-0.988943	1.34024e-19	1.03273e-17
ENSG00000104147.8	OIP5	-3.92024	2.54371e-30	2.63987e-28
ENSG00000225093.1	RPL3P7	0.838644	0.00491632	0.0417539
ENSG00000256663.1	NA	-2.0907	1.02478e-27	1.01651e-25
ENSG00000275074.1	NUDT18	0.369466	0.00499936	0.0422198
ENSG00000091651.8	ORC6	-2.3081	2.28805e-13	1.27577e-11
ENSG00000285396.1	NA	-3.80578	0.000414582	0.00572569
ENSG00000170425.3	ADORA2B	-0.380133	0.00165005	0.0178464
ENSG00000214022.11	REPIN1	0.197823	0.00232477	0.0233178
ENSG00000175216.14	CKAP5	-0.306749	0.000187759	0.00289607
ENSG00000141367.11	CLTC	-0.217846	0.00385935	0.034628
ENSG00000138376.10	BARD1	-1.23209	7.03606e-18	4.99887e-16
ENSG00000188554.13	NBR1	0.196137	0.000882096	0.0107809
ENSG00000188070.9	C11orf95	0.233199	9.43163e-05	0.0015945
ENSG00000163935.13	SFMBT1	-0.597352	1.48134e-05	0.00032082
ENSG00000135069.13	PSAT1	-1.47264	6.22212e-11	2.84254e-09
ENSG00000212747.4	RTL8B	0.217185	0.0045735	0.0394583
ENSG00000173548.8	SNX33	0.170613	0.00404635	0.0359111
ENSG00000198700.9	IPO9	-0.173602	0.00404235	0.0358934
ENSG00000138798.11	EGF	-1.14263	0.00043013	0.00589058
ENSG00000170364.12	SETMAR	0.710218	0.000414497	0.00572569
ENSG00000115392.11	FANCL	-0.46561	0.00342031	0.0315517
ENSG00000111788.10	NA	-0.827938	0.000146932	0.00234446
ENSG00000204219.10	TCEA3	0.412426	8.63392e-11	3.90462e-09
ENSG00000159131.16	GART	-0.334368	0.00042267	0.00581057
ENSG00000148019.13	CEP78	-0.617741	5.33872e-09	2.01368e-07
ENSG00000140988.15	RPS2	0.276003	0.00452678	0.0391304
ENSG00000164105.3	SAP30	-0.447984	0.00316805	0.0298347
ENSG00000183814.15	LIN9	-1.45895	2.93644e-09	1.14362e-07
ENSG00000115758.12	ODC1	-0.528385	8.69807e-11	3.92375e-09
ENSG00000116701.14	NCF2	-0.954044	0.00614186	0.0495822
ENSG00000284681.2	NA	-11.299	1.22506e-15	7.71746e-14
ENSG00000124191.17	TOX2	-0.508225	1.82961e-05	0.000383748
ENSG00000285628.1	NA	-1.6146	2.36469e-08	8.25984e-07
ENSG00000240694.8	PNMA2	-0.683198	0.000169979	0.00265836
ENSG00000116560.10	SFPQ	-0.244922	0.00212799	0.0217111
ENSG00000258655.2	ARHGAP5-AS1	0.646739	3.82441e-06	9.32927e-05
ENSG00000196743.8	GM2A	0.288464	0.000870418	0.0106851
ENSG00000196814.14	MVB12B	0.317602	9.2926e-05	0.00157396
ENSG00000115232.13	ITGA4	-0.364268	3.57433e-05	0.000697539
ENSG00000108821.13	COL1A1	0.27393	0.000376933	0.00527883
ENSG00000066923.17	STAG3	-2.87472	0.000164607	0.00258335
ENSG00000100056.11	ESS2	0.20964	0.00392265	0.0350908
ENSG00000111716.12	LDHB	-0.218574	0.00184444	0.019491
ENSG00000182287.14	AP1S2	-0.418504	9.89576e-05	0.00165734
ENSG00000133872.13	SARAF	0.363026	9.40959e-09	3.4548e-07
ENSG00000100162.14	CENPM	-3.66108	1.17921e-46	1.68027e-44
ENSG00000128165.8	ADM2	-0.909735	6.78072e-06	0.000157696
ENSG00000116016.13	EPAS1	0.310437	0.000129759	0.00210071
ENSG00000090776.5	EFNB1	0.507446	4.34449e-10	1.81397e-08
ENSG00000076382.16	SPAG5	-3.91844	0	0
ENSG00000274180.1	NATD1	0.415823	4.16085e-08	1.39373e-06
ENSG00000116679.15	IVNS1ABP	-0.356087	0.00143917	0.0159913
ENSG00000261221.3	ZNF865	0.283158	0.0017897	0.0190132
ENSG00000175352.10	NRIP3	-0.298335	1.50862e-05	0.00032477
ENSG00000079616.12	KIF22	-1.42629	4.60392e-37	5.43808e-35
ENSG00000168453.14	HR	0.348185	0.00360781	0.0328805
ENSG00000105376.4	ICAM5	0.360727	8.4761e-06	0.00019386
ENSG00000124789.11	NUP153	-0.442685	7.23112e-07	1.99735e-05
ENSG00000080546.13	SESN1	0.74342	1.65892e-06	4.33541e-05
ENSG00000102054.17	RBBP7	-0.294251	0.00182015	0.0192796
ENSG00000198712.1	COX2	-0.254168	0.00203724	0.0210452
ENSG00000105011.8	ASF1B	-4.23473	2.13504e-191	1.91662e-188
ENSG00000186871.6	ERCC6L	-6.00202	2.06563e-65	4.07543e-63
ENSG00000177954.12	RPS27	0.225417	0.00126197	0.0143857
ENSG00000168734.13	PKIG	0.189556	0.00203621	0.0210452
ENSG00000233830.2	EIF4HP1	-0.357825	0.00367382	0.0332962
ENSG00000120438.11	TCP1	-0.284256	2.5495e-05	0.00052134
ENSG00000112029.9	FBXO5	-1.59153	1.35199e-30	1.41126e-28
ENSG00000234975.6	FTH1P2	0.480825	0.00337847	0.0312826
ENSG00000183287.14	CCBE1	-0.51507	0.0033919	0.0313746
ENSG00000185641.6	NA	0.351562	0.000643072	0.00829433
ENSG00000142687.17	KIAA0319L	0.219564	0.000380297	0.00531764
ENSG00000063180.8	CA11	0.44657	0.000200845	0.00307153
ENSG00000171566.11	PLRG1	-0.276635	0.00070363	0.00895581
ENSG00000118046.14	STK11	0.247289	0.00261751	0.0256942
ENSG00000099308.10	MAST3	0.317085	5.29776e-05	0.000976549
ENSG00000147536.11	GINS4	-1.82813	1.1057e-09	4.4411e-08
ENSG00000103489.11	XYLT1	-0.373576	8.30786e-05	0.00142873
ENSG00000151012.13	SLC7A11	-0.771428	5.45674e-15	3.29866e-13
ENSG00000169908.11	TM4SF1	-1.62932	2.99843e-24	2.70521e-22
ENSG00000167658.15	EEF2	0.18981	0.00345178	0.0317486
ENSG00000167394.12	ZNF668	0.821886	0.000316655	0.00453367
ENSG00000130811.11	EIF3G	0.256426	0.000670245	0.00858921
ENSG00000168056.15	LTBP3	0.385123	1.09151e-09	4.39395e-08
ENSG00000102710.19	SUPT20H	-0.210908	0.00136752	0.0153485
ENSG00000105486.13	LIG1	-0.830249	9.47017e-15	5.68654e-13
ENSG00000124496.12	TRERF1	-0.199363	0.0043378	0.0380327
ENSG00000179750.15	APOBEC3B	-4.92943	5.42346e-55	9.36277e-53
ENSG00000163006.11	CCDC138	-1.20933	0.00328127	0.0306513
ENSG00000171444.17	MCC	0.415003	3.87715e-07	1.11734e-05
ENSG00000104738.17	MCM4	-1.01708	7.47009e-18	5.28023e-16
ENSG00000146143.17	PRIM2	-0.320559	0.000502679	0.00674018
ENSG00000101361.16	NOP56	-0.310029	0.000428255	0.00587387
ENSG00000146247.13	PHIP	-0.203235	0.00435367	0.0381111
ENSG00000163808.16	KIF15	-3.3379	2.46428e-53	4.09664e-51
ENSG00000221869.4	CEBPD	0.470434	1.2894e-07	4.03307e-06
ENSG00000130695.15	CEP85	-0.847268	1.51124e-14	8.98436e-13
ENSG00000023892.10	DEF6	-0.447671	0.00359774	0.0328291
ENSG00000163814.7	CDCP1	-0.709551	7.37927e-09	2.74301e-07
ENSG00000183283.15	DAZAP2	0.475647	0.00588207	0.0479595
ENSG00000274276.4	CBSL	-0.560559	2.35325e-14	1.38073e-12
ENSG00000141933.9	TPGS1	0.535797	0.000221458	0.00332446
ENSG00000114270.17	COL7A1	0.396506	0.000417411	0.00576033
ENSG00000268083.5	NA	-8.68425	0.000187052	0.00288764
ENSG00000188807.12	TMEM201	-0.534038	3.23062e-08	1.10481e-06
ENSG00000186376.14	ZNF75D	0.40319	0.00131157	0.0148567
ENSG00000103257.8	SLC7A5	-0.589359	1.21316e-10	5.39136e-09
ENSG00000131236.16	CAP1	-0.417515	0.00243405	0.0241961
ENSG00000150551.10	LYPD1	0.653251	2.11013e-12	1.09495e-10
ENSG00000142459.8	EVI5L	0.244199	0.00446787	0.038725
ENSG00000189164.14	ZNF527	-0.529637	0.00600291	0.0487675
ENSG00000198901.13	PRC1	-2.92231	1.27202e-100	4.30904e-98
ENSG00000060069.16	CTDP1	0.190371	0.00517063	0.0431783
ENSG00000173918.14	C1QTNF1	0.504171	1.4219e-05	0.00031057
ENSG00000162613.16	FUBP1	-0.252628	9.62629e-05	0.0016213
ENSG00000120802.13	TMPO	-1.70521	2.26011e-51	3.55947e-49
ENSG00000153879.8	CEBPG	-0.613968	3.52902e-05	0.000690197
ENSG00000168405.17	CMAHP	-0.759614	4.70735e-12	2.39422e-10
ENSG00000150630.3	VEGFC	-0.214977	0.00127639	0.0145224
ENSG00000082397.17	EPB41L3	0.412375	7.35669e-06	0.000170209
ENSG00000064687.12	ABCA7	0.677491	1.46348e-09	5.82602e-08
ENSG00000147912.12	FBXO10	-0.529981	0.000365103	0.00514122
ENSG00000182484.15	WASH6P	0.441858	0.000122858	0.00199438
ENSG00000072864.14	NDE1	-0.544544	1.25359e-08	4.53769e-07
ENSG00000142197.12	DOP1B	-0.26837	0.00124106	0.0142286
ENSG00000137309.19	HMGA1	-0.346102	0.00170556	0.0183253
ENSG00000099725.14	PRKY	0.317894	0.00209224	0.0214407
ENSG00000222005.9	LINC01118	0.547876	0.00545356	0.0451629
ENSG00000142230.11	SAE1	-0.331372	7.76457e-05	0.00134887
ENSG00000091490.10	SEL1L3	-0.424772	5.31264e-07	1.49738e-05
ENSG00000243449.6	C4orf48	0.607209	4.57956e-06	0.000110661
ENSG00000145012.13	LPP	-0.988861	0.000133152	0.00214983
ENSG00000129810.14	SGO1	-7.55367	4.40098e-10	1.8333e-08
ENSG00000136159.3	NUDT15	-0.412572	9.237e-06	0.000208605
ENSG00000150457.8	LATS2	0.193097	0.00431764	0.0379437
ENSG00000059122.16	FLYWCH1	0.24924	0.00105775	0.0125104
ENSG00000109625.18	CPZ	0.375999	9.81361e-11	4.41588e-09
ENSG00000184900.15	SUMO3	-0.20345	0.00188412	0.0198402
ENSG00000128422.16	KRT17	1.50425	1.91781e-73	4.30405e-71
ENSG00000163507.13	CIP2A	-2.14352	4.51029e-90	1.3725e-87
ENSG00000104529.17	EEF1D	0.572866	3.98291e-05	0.000764804
ENSG00000108651.9	UTP6	-0.268113	0.00177552	0.0188961
ENSG00000089685.14	BIRC5	-4.03271	9.38705e-128	5.26672e-125
ENSG00000173530.5	TNFRSF10D	0.522433	1.03811e-11	5.0103e-10
ENSG00000214223.4	HNRNPA1P10	-0.31028	0.00208501	0.0213788
ENSG00000152229.18	PSTPIP2	0.293665	0.003174	0.0298567
ENSG00000076003.4	MCM6	-0.890988	1.91583e-37	2.27793e-35
ENSG00000115970.18	THADA	-0.221486	0.000855302	0.0105415
ENSG00000060982.14	BCAT1	-0.721876	1.69545e-06	4.42444e-05
ENSG00000254838.5	GVINP1	-1.2917	0.00376806	0.0339951
ENSG00000171206.14	TRIM8	0.22118	0.00295608	0.0282305
ENSG00000284874.1	SEPT5-GP1BB	1.10899	5.13667e-06	0.000121989
ENSG00000164764.10	SBSPON	0.334835	0.000181725	0.00281996
ENSG00000102755.11	FLT1	-0.285038	3.10947e-05	0.000618244
ENSG00000106804.7	C5	-0.868123	2.14419e-11	1.01844e-09
ENSG00000120437.8	ACAT2	-0.378894	0.00197459	0.0206334
ENSG00000087077.13	TRIP6	0.247971	0.0015611	0.0170903
ENSG00000232434.2	AJM1	0.546613	3.22252e-06	7.93651e-05
ENSG00000175592.8	FOSL1	-0.723606	5.28879e-11	2.441e-09
ENSG00000197258.5	EIF4BP6	0.324906	0.00236231	0.0236283
ENSG00000108960.8	MMD	-0.80813	0.0051673	0.0431706
ENSG00000160691.18	SHC1	0.246206	5.03023e-05	0.000935884
ENSG00000136295.14	TTYH3	0.277978	2.58945e-05	0.000527109
ENSG00000065150.18	IPO5	-0.362328	1.48108e-05	0.00032082
ENSG00000103145.10	HCFC1R1	0.513547	0.00200702	0.0208854
ENSG00000261888.1	NA	0.496305	6.15782e-11	2.82035e-09
ENSG00000162039.15	MEIOB	-5.20126	0.00113813	0.0133121
ENSG00000112118.18	MCM3	-1.07751	1.81808e-28	1.81343e-26
ENSG00000162104.9	ADCY9	0.254316	0.00156942	0.0171396
ENSG00000196576.14	PLXNB2	0.445344	2.8373e-09	1.10741e-07
ENSG00000111452.12	ADGRD1	0.479119	1.25789e-05	0.000277448
ENSG00000165861.13	ZFYVE1	0.289478	1.64071e-05	0.000348196
ENSG00000177432.7	NAP1L5	0.353076	0.00028763	0.00418147
ENSG00000136813.14	ECPAS	-0.209143	0.000169261	0.00264945
ENSG00000143401.14	ANP32E	-0.692826	1.55667e-12	8.19604e-11
ENSG00000163328.13	GPR155	0.45586	0.00193385	0.020313
ENSG00000149485.18	FADS1	0.194299	0.00372183	0.0336852
ENSG00000179300.3	RTL3	-1.19062	0.00124492	0.0142364
ENSG00000168610.14	STAT3	0.172819	0.000854864	0.0105415
ENSG00000182836.9	PLCXD3	-1.01783	0.00152237	0.0167582
ENSG00000166845.14	C18orf54	-0.94584	2.71742e-05	0.00055066
ENSG00000126005.16	MMP24OS	0.454916	8.7787e-07	2.37727e-05
[truncated: 229 more rows]
