# Supplementary material for: Epigenetic Modulation of Radiation-Induced Diacylglycerol Kinase Alpha Expression Prevents Pro-Fibrotic Fibroblast Response
Source: Cancers (Basel). 2021 May 18;13(10):2455. doi: 10.3390/cancers13102455 (PMC8158145; doi:10.3390/cancers13102455)
Supplement: Supplementary file 1 [file cancers-13-02455-s001.zip › Table S10. List of differentially expressed genes from effect of mutation, adjusted for IR.xlsx]

## Sheet: Sheet1
Table S10. The list DEGs from effect of mutation, adjusted for IR
ENSEMBL_id	symbol	log2FoldChange	pvalue	padj
107	GUCY1A1	1.31603	6.59601e-07	0.000430742
152	NA	-0.164031	0.000338906	0.0289779
185	WFDC1	0.525791	0.000233139	0.0243047
306	FOXC2	0.333912	0.000265524	0.0263421
450	ANKRD1	-0.331532	0.000300713	0.0277153
466	PCDHGA2	-0.280409	3.51855e-05	0.00715496
616	SLPI	-1.17158	1.15433e-05	0.00378791
771	POPDC3	-0.317497	0.00039413	0.0317454
831	NREP	0.544093	9.49053e-06	0.00336344
965	CASP4	-0.203678	0.000305333	0.0278892
1058	NRN1	-0.870178	2.74636e-07	0.000243327
1312	SMAD6	0.385431	0.000580097	0.0407909
1483	NA	0.384458	4.13909e-05	0.00780263
1569	PCDHGB4	-0.375459	1.40925e-05	0.00416198
1669	KIAA1522	0.206145	0.000682837	0.0460071
1779	FAM156A	-0.185599	1.71323e-05	0.0047435
1926	PARM1	-0.590401	6.20746e-07	0.000423062
2049	PI3	-1.53717	3.77437e-06	0.00176005
2079	ERBB3	0.349671	0.000384144	0.0314706				83
2082	KCNJ6	-0.652886	4.02901e-05	0.00767678
2093	KDM3A	-0.204047	1.00096e-05	0.00347786
2100	ANGEL1	-0.189896	8.01591e-05	0.0116428
2248	TMEM64	0.215635	5.70985e-05	0.00929945
2331	KCTD4	-0.869098	9.31552e-05	0.0125832
2492	RAMP1	0.696927	2.44941e-07	0.000232526
2657	NA	10.675	0.00032822	0.0289779
2730	EFHD1	0.42682	0.000656015	0.0448826
2889	GDA	-1.06979	0.000419801	0.0329994
2906	NIPSNAP2	0.240863	0.000232729	0.0243047
2915	CLSTN2	-0.430178	3.70156e-05	0.00728796
3122	NTNG1	-0.258917	0.00031859	0.0285122
3147	IVL	-1.54669	6.03031e-05	0.00954081
3215	NFIX	0.305196	0.000548072	0.0398026
3230	NA	0.138238	0.000556635	0.0400959
3249	RIPK3	0.278077	1.56753e-06	0.00086802
3277	KCNJ3	0.481835	0.000509318	0.037762
3403	MAMDC2	-0.30897	2.78764e-06	0.00141981
3618	KANK2	0.163403	0.000424597	0.0329994
3819	KRAS	0.217359	0.000670698	0.0455355
4087	PREX1	-0.53581	5.7728e-05	0.00929945
4108	CCDC137	-0.876796	0.000298936	0.0277153
4115	NA	0.696997	0.000215573	0.0234353
4147	TMEM30B	0.533919	4.96108e-10	1.46517e-06
4186	SNAP25	-0.705064	2.03276e-07	0.000211886
4196	HSP90AB1	-0.128745	0.000364656	0.0302516
4233	GIT1	-0.249131	0.000260976	0.0262755
4364	TCEAL3	0.290369	0.000397529	0.0318743
4512	INKA2	-0.331151	9.73696e-05	0.0129729
4697	NPTXR	-0.26686	1.96119e-05	0.00511064
4703	PGD	-0.122921	0.000464998	0.0352432
4865	SH3D19	0.211904	0.000432012	0.0332837
4916	GAS5	-0.188963	3.0089e-07	0.000253894
4979	PNMA8B	0.492822	0.000565567	0.0403757
5081	ZNF560	-0.384041	4.25112e-05	0.00792946
5307	SNHG8	-0.0920329	0.000638785	0.0438731
5372	PWP2	-0.153833	8.55015e-05	0.0118705
5424	PAPSS1	-0.126227	0.000174558	0.019828
5426	ERAP1	-0.237616	3.7973e-05	0.00739431
5481	SYPL2	0.48175	3.9034e-06	0.00176687
5482	GLUL	0.139654	0.000711633	0.0475854
5630	UGT1A8	1.13998	0.000403904	0.032095
5690	PDE3A	0.739696	0.00010125	0.0130959
6009	SCUBE3	-0.36515	0.000250826	0.0255439
6129	RXFP1	0.848497	3.16192e-05	0.00688813
6183	LINC00346	0.209512	0.000290821	0.027527
6188	EPHB2	-0.319828	0.000423739	0.0329994
6344	CAMK2N1	0.145352	7.78638e-06	0.00304975
6376	ATXN10	-0.247201	7.00138e-05	0.0104797
6476	NPC1	-0.189361	5.27249e-05	0.00907072
6521	SNX18	0.272055	6.51422e-10	1.6124e-06
6588	PTPRN	-0.534949	2.96317e-05	0.00681914
6989	FUCA1	-0.237054	0.00010554	0.013552
7056	PTGFRN	0.641654	4.89486e-10	1.46517e-06
7309	BEX2	-0.654446	0.000184896	0.0207364
7318	ADRB2	-0.410958	0.000270356	0.0263421
7462	TRMT10B	-0.46031	0.00012013	0.0149658
7534	CSDC2	0.41159	8.57461e-05	0.0118705
7641	STMN2	-0.546936	5.78854e-08	7.89022e-05
7928	ITPKB	0.328674	5.24593e-05	0.00907072
7951	WNT16	-0.905465	2.3147e-05	0.00569675
8024	NAGPA	-0.449679	0.000164447	0.019171
8055	TMEM200A	-0.210202	0.000309939	0.0281647
8297	APOD	0.593922	1.95192e-07	0.000211886
8459	WNT2	0.841862	8.0769e-06	0.00304975
8482	TRO	-0.651154	0.000427814	0.0331042
8502	MPP4	-0.527314	4.82455e-05	0.00867475
8511	UBQLNL	-1.3141	5.09044e-05	0.00893094
8599	BAMBI	0.404351	0.000235452	0.0243988
8674	VIT	0.488788	0.00014294	0.0171142
8699	NA	0.487555	0.000721144	0.0478602
8845	CCDC8	0.27685	0.000101151	0.0130959
8951	BASP1	0.151011	1.35426e-05	0.0041586
9239	VSTM4	0.238129	8.43921e-10	1.66159e-06
9418	MTUS1	0.329058	0.000591983	0.041299
9485	PDCL	0.116392	0.000529429	0.038607
9586	ADRA1B	0.685767	1.9304e-05	0.00511064
9632	CLGN	-0.644716	2.12474e-05	0.00538021
9979	LAMB3	-0.402036	0.00038539	0.0314706
9982	EEF1A2	-0.354159	0.000229566	0.0243047
9989	KLHDC7B	-0.855481	0.000292048	0.027527
10149	TMEM54	-0.214978	0.000524377	0.0384813
10388	EXT2	-0.270644	4.454e-06	0.001925
10480	DUSP6	-0.403874	1.44325e-05	0.00419254
10481	SLC38A5	0.666609	0.000215496	0.0234353
10571	FLRT2	-0.152456	0.000670304	0.0455355
10722	MPST	0.468898	0.00029417	0.0275803
10751	DKK3	-0.239156	1.35652e-05	0.0041586
10841	COL3A1	0.499278	2.49323e-07	0.000232526
10964	MPHOSPH10	0.379885	6.80773e-05	0.0104709
10973	SPOCK1	0.235089	0.000142362	0.0171142
11058	SYNRG	-0.273312	5.86334e-07	0.000418009
11062	EXPH5	0.3368	1.57123e-05	0.00449068
11157	ADRA2A	1.18782	3.10321e-05	0.00688749
11212	SLC11A2	-0.365124	0.000465401	0.0352432
11524	OAS3	-0.47979	0.000323043	0.0287654
11653	DENND2D	-0.188521	0.000341791	0.0289779
11663	MAP4K3-DT	-0.239722	0.000271467	0.0263421
11759	NEO1	-0.171033	5.61793e-05	0.00929945
11924	IGSF3	-0.651688	0.000120773	0.0149658
11954	CHDH	0.587058	6.81768e-06	0.00280952
12045	SLC7A14	-0.572315	0.000223661	0.0241663
12094	ANOS1	-0.586926	1.20526e-06	0.000736452
12264	NA	-6.01083	0.000738968	0.0486785
12333	NA	-2.26162	0.000377974	0.0311521
12341	MIR1915HG	0.309643	0.000212657	0.0234055
12487	MFAP5	0.404945	0.000233171	0.0243047
12712	CNKSR3	0.278186	0.000107543	0.0137098
13311	ZNF808	-0.742113	6.74458e-05	0.0104709
13445	MEST	0.357333	3.65361e-05	0.00727439
13467	PGAM1	-0.14743	2.45436e-05	0.00587719
13542	JUND	0.30964	1.37463e-05	0.0041586
13564	STEAP3	-0.301693	3.18751e-05	0.00688813
13611	NA	-0.65783	0.000401481	0.0320462
13718	ACTG2	0.519071	9.17584e-05	0.0125074
13791	GABBR2	0.668608	6.80631e-07	0.000430742
13807	DMD	0.394002	5.88771e-05	0.00939912
14062	COQ9	-0.273486	0.000569487	0.0403757
14093	RYR1	1.48522	1.38546e-06	0.0007963
14106	KANK1	0.169068	0.000514259	0.0379694
14124	KAT7	-0.400293	0.000363934	0.0302516
14127	MAF	0.487882	3.4769e-05	0.00715496
14135	CNTNAP3B	1.06216	2.24437e-20	3.97702e-16
14136	ARF6	0.127518	0.000268728	0.0263421
14175	TMEM258	-0.121968	0.000751646	0.0489926
14220	AOX1	-0.219242	2.42225e-05	0.00587719
14221	ACPP	-0.708004	5.48636e-05	0.00925889
14327	NA	-1.28693	0.000625217	0.0432767
14516	ADAMTS15	0.327987	4.84651e-05	0.00867475
14523	KBTBD11	0.472054	1.83376e-05	0.0049991
14574	DNAAF4-CCPG1	-26.1686	7.0384e-18	6.23602e-14
14771	PLEKHG4B	0.366875	0.000556151	0.0400959
14935	LINC00452	-0.629197	3.09951e-05	0.00688749
14999	GALNT15	-0.400178	3.98841e-06	0.00176687
15138	ZNFX1	-0.16356	3.33449e-05	0.00703418
15238	ABCG1	-0.482191	0.000745604	0.0489337
15264	SERPINB9	0.362785	1.39308e-06	0.0007963
15340	LAMP3	-0.954563	1.29933e-05	0.0041586
15397	GAS6	-0.277747	1.93662e-05	0.00511064
15429	YIPF1	-0.193038	0.000391064	0.0316422
15430	TP53I11	0.214502	0.000715667	0.0476752
15508	CA8	-0.782349	0.000281266	0.0267959
15647	TMEM220	0.19709	1.62974e-05	0.00458396
15661	INPP5A	0.157526	0.000569635	0.0403757
15979	ATP1A1	-0.117178	0.000243794	0.0251165
15991	TRPC6	0.679266	0.000343417	0.0289779
16027	MYO1D	0.175651	5.88237e-06	0.0024818
16109	C1orf115	0.406609	5.55833e-09	9.84937e-06
16220	SERPINB10	-0.50472	0.000577201	0.040749
16255	RNF150	0.458923	0.000246247	0.0252226
16291	ZBTB34	0.198963	0.000274143	0.0264012
16372	ADAMTS7	0.326059	0.00015677	0.0185197
16528	SPARC	0.314951	0.000140348	0.017034
16558	ATG7	-0.177382	0.000487131	0.0364218
16744	RASIP1	0.756546	3.79476e-10	1.46517e-06
16761	ACKR3	0.620631	5.03425e-07	0.000387856
16791	NA	-1.40377	0.000622594	0.0432642
16810	CYFIP2	-0.362161	7.27945e-10	1.6124e-06
17061	PCDHGA4	-0.337964	0.000272043	0.0263421
17102	AREG	-0.807219	0.000334446	0.0289779
17122	CSRNP3	0.441762	7.98858e-05	0.0116428
17375	COL5A1	0.390663	0.00031666	0.0284833
17479	NLGN1	0.386001	0.000268274	0.0263421
17723	EDIL3	0.826749	1.72129e-11	1.01671e-07
17751	DOK6	0.489757	7.7904e-05	0.0115038
17808	KCNMA1	-0.328122	5.05347e-05	0.00893094
17961	FAM174B	0.441586	1.27692e-08	2.057e-05
18021	ATP8B1	0.241193	0.000330095	0.0289779
18109	PCDH18	0.826573	0.000340678	0.0289779
18155	TMEM130	0.431194	0.000681589	0.0460071
18160	LTBP1	-0.355645	9.81724e-05	0.0129822
18267	RAB11A	0.617683	0.000338186	0.0289779
18330	PDZRN3	0.380286	0.000301865	0.0277153
18557	TBCEL	0.392799	0.000263209	0.0263421
18954	A2M	0.417125	2.164e-05	0.00540085
19038	RFLNB	0.229643	4.65168e-05	0.00849771
19141	KMT5C	0.419033	3.55325e-05	0.00715496
19155	TAFA5	0.569166	4.55554e-05	0.00840877
19207	TMEM104	-0.623649	0.000334031	0.0289779
19309	NPIPA2	-10.2126	9.05125e-06	0.00327323
19318	PTH1R	0.710688	2.77555e-06	0.00141981
19358	NT5E	-0.330094	9.89731e-05	0.0129911
19400	RUNX3	0.683395	0.00035083	0.0294631
19468	NA	0.235054	0.000225669	0.0242355
19521	FST	-0.484454	5.71679e-05	0.00929945
19529	PEG3	-0.761143	0.000752031	0.0489926
19794	COL5A3	0.378841	5.41308e-05	0.00922306
19874	CYB5R1	-0.160059	0.000561326	0.04027
19993	MYL3	0.774463	0.000139044	0.0169922
20138	RAP2B	0.264843	2.12536e-05	0.00538021
20206	KCNK6	0.240171	0.000591693	0.041299
20333	AFF1	-0.572865	0.00025558	0.0258793
20503	GUCY1B1	0.608744	3.73647e-06	0.00176005
20541	MTAP	-0.539672	0.000122465	0.01507
20663	HERC6	-0.552748	0.000199056	0.0220455
20701	SHANK2	0.480081	3.32634e-05	0.00703418
20724	HOXC5	1.76718	0.000685767	0.0460295
20766	KCNS2	0.639273	0.000314235	0.0284094
20808	COMP	0.691609	7.09267e-06	0.00285641
20867	TLE2	0.675453	0.000422392	0.0329994
21009	NA	0.718195	0.00072446	0.0479009
21401	CHRAC1	0.208943	8.19211e-05	0.0117068
21435	PRSS12	0.266421	0.000109879	0.0139076
21477	ZNF585A	0.299549	0.000525535	0.0384813
21530	CRLF1	0.329203	0.000172548	0.0198077
21566	DAPK1	0.272039	8.11347e-05	0.0116887
21599	RCCD1	0.272208	0.000341378	0.0289779
21637	SNCA	-0.322045	3.10948e-05	0.00688749
21836	TGFA	-0.375907	3.96557e-05	0.00763803
21907	REPS1	-0.190366	0.000388325	0.0315648
22131	CNN3	0.193218	0.000232019	0.0243047
22276	COL1A1	0.504188	0.000118539	0.0148973
22367	CSMD2	-0.529568	2.80436e-06	0.00141981
22383	HR	0.597555	3.46668e-06	0.00170637
22429	SELENOP	0.665067	1.94148e-07	0.000211886
22693	HUNK	0.351772	8.4988e-05	0.0118705
22840	CDCP1	-0.578823	0.000489517	0.0364464
22863	HAPLN1	0.722259	2.38153e-08	3.51673e-05
22951	TGM2	-0.360584	2.60674e-05	0.00615887
23182	KRTAP3-1	-0.98998	0.000275819	0.026419
23229	DPAGT1	-0.219112	2.82158e-05	0.00657874
23250	C4orf48	0.422089	0.000470056	0.0354442
23292	CPZ	0.390309	6.91365e-05	0.0104709
23308	KRT17	0.269715	8.45411e-05	0.0118705
23375	BNC1	-0.363494	1.09978e-05	0.00374771
23551	NCSTN	-0.168985	1.38464e-05	0.0041586
23672	LIN7A	0.295159	0.000477469	0.0358506
23707	HERC5	-0.544336	0.000170834	0.0197855
23743	LURAP1L	-0.404927	6.89727e-05	0.0104709
23777	NA	-2.21088	8.94499e-08	0.000113218
24049	TNFRSF21	-0.457614	6.89117e-05	0.0104709
24181	SLC35F2	-0.300056	0.000158435	0.0185925
24291	FAM8A1	0.274235	0.000186769	0.0208147
24333	PAMR1	-0.314792	0.000458514	0.035021
24412	OSR2	0.409597	0.000173261	0.0198077
24497	SRD5A2	0.70755	0.000148813	0.0176977
24529	PLEKHG4	-0.250717	0.000183797	0.0207364
24573	NA	0.588784	7.03771e-05	0.0104797
24584	TWIST1	0.244608	0.000295806	0.0275878
24734	SVBP	0.693663	3.94962e-07	0.000318124
24828	PHACTR2	0.21439	0.000418549	0.0329994
24871	FBXO34	1.81576	0.000365341	0.0302516
24963	KPRP	-1.5056	8.08905e-06	0.00304975
25082	JCHAIN	0.617305	3.51143e-05	0.00715496
25129	PDPN	0.916053	8.87836e-05	0.0121957
25200	NAA60	0.425763	0.000334177	0.0289779
25226	GLB1	-0.201056	8.74416e-06	0.00322805
25530	PPP1R3D	0.215477	5.77109e-05	0.00929945
25795	PDGFA	0.284264	1.13594e-05	0.00378791
26154	ANO3	0.513956	0.000453757	0.0348077
26351	ZNRF2	0.346479	5.89742e-07	0.000418009
26374	PRNP	-0.151821	9.37347e-05	0.0125832
26399	NA	-0.169955	0.000630053	0.0434418
